# Supplementary material for: Transcriptomics and proteomics analyses of the PACAP38 influenced ischemic brain in permanent middle cerebral artery occlusion model mice
Source: J Neuroinflammation. 2012 Nov 23;9:256. doi: 10.1186/1742-2094-9-256 (PMC3526409; doi:10.1186/1742-2094-9-256)
Supplement: Additional file 2 — Table S2. Primer combinations used for RT-PCR. [file 1742-2094-9-256-S2.xlsx]

## Sheet: Suppl Table 2
Supplementary Table 2. Primer combinations used for RT-PCR.
	Forward Primer		Reverse Primer
Accession (Gene)	Primer name	Nucleotide sequence (5'-3')	Primer name	Nucleotide sequence (5'-3')	Product size (bp)	Description
NM_001001303	MS099	gctacactgaggaccaggttgt	MS100	ctcctgttattatgggggtctg	306	GAPDH
NM_007393	MS101	acgttgacatccgtaaagacct	MS102	ggtgtaaaacgcagctcagtaa	302	b-actin
NM_008068	MS495	cttcaccaatctccagtcacag	MS496	gcaaaagctactgggaagagaa	312	Gabra6
NM_031168	MS245	agaggataccactcccaacaga	MS246	ctgaaggactctggctttgtct	322	Il6
NM_011312	MS235	gctgaccctgagtaggaaagaa	MS236	ataggaggggcagttaaagagg	264	S100a5
NM_016971	MS497	actgttgacacttgtgcgatct	MS498	ctgactcctcggaacagtttct	276	Il22
NM_008361	MS499	tgacgttcccattagacaactg	MS500	tcaaactccactttgctcttga	342	Il1b
AK050118	MS501	tggttcaaactaaccattgcag	MS502	ggagcttccccttcagtatttt	261	Igf1
NM_011333	MS505	ttttgtcaccaagctcaagaga	MS506	attaaggcatcacagtccgagt	279	Ccl2
NM_020013	MS519	ctctctatggatcgcctcactt	MS520	tgtaaaggctctaccatgctca	277	Fgf21
AK171340	MS515	ctcgagagagaagtgtgcttca	MS516	ctgtgtccaatcagcaagatgt	260	Pitpnc1
NM_010140	MS517	atcaaaccttcttctggaccaa	MS518	ggagctttctgcagcatcttat	346	Epha3
NM_008350	MS703	ggcctgctgttgttaaagactc	MS704	atctcagttccctgctcttcag	284	Il11
NM_009909	MS699	tcgtcttcagcaaacacctcta	MS700	ctgatgggtaggaggcagtatc	330	Cxcr2
NM_001159317	MS701	agaaagtcacctcaggagcaag	MS702	tgggatagacacatcctgtgag	327	Il1rap
AK021047	MS695	ttttgtttgccttctcaacaga	MS696	catgtgggctcttgacattaaa	281	C030005H24Rik
NM_019465	MS697	ggagccaaaacaaagaagagtg	MS698	tgatccaaaacgacttagcaga	331	Crtam
NM_013693	MS171	tactcccaggttctcttcaagg	MS172	gctgggtagagaatggatgaac	330	Tnf
NM_010484	MS507	ccctctgtttctcctgttcatc	MS508	atgtcctctccctcagtgtgtt	279	Slc6a4
NM_173391	MS509	cgtatggagcagggttactttc	MS510	tcctgcaccacattctcaatac	283	Tph2
NM_008611	MS241	ggttaggatgagccataagtgc	MS242	atgtgcttgagaaaggaatggt	273	Mmp8
NM_011169	MS491	ggagttcttggaagtggatgac	MS492	tgtatgacaattgggggtgtta	334	Prlr
NM_009140	MS521	aacatccagagcttgagtgtga	MS522	ataacaacatctgggcaatgg	338	Cxcl2
