# Supplementary material for: Transcriptomics and proteomics analyses of the PACAP38 influenced ischemic brain in permanent middle cerebral artery occlusion model mice
Source: J Neuroinflammation. 2012 Nov 23;9:256. doi: 10.1186/1742-2094-9-256 (PMC3526409; doi:10.1186/1742-2094-9-256)
Supplement: Additional file 10 — Table S4. Effect of PACAP 38 injection on expression of genes at 24 h with a focus on ischemia and PACAP. [file 1742-2094-9-256-S10.xlsx]

## Sheet: Suppl Table 4
Supplementary Table 4: Efect of PACAP38 injection on expression of genes at 24 h with a focus on ischemia and PACAP.
24 h Upregulated
4930412M03Rik	A_52_P395342	5.71836	A_52_P395342	1.57894
Lao1	A_51_P349652	5.43818	A_51_P349652	1.59294
Fgf21	A_52_P235347	5.37659	A_52_P235347	4.25262
Aire	A_51_P376127	4.87742	A_51_P376127	2.04949
Lipg	A_52_P344424	4.09322	A_52_P344424	1.85522
Klk1b26	A_52_P543684	3.94674	A_52_P543684	1.62327
A_51_P198596	A_51_P198596	3.5175	A_51_P198596	1.53917
Fgf21	A_51_P315925	3.0899	A_52_P235347	4.25262
Fbxw16	A_52_P486523	2.99238	A_52_P486523	2.22189
1110020A10Rik	A_52_P1138643	2.79168	A_52_P1138643	2.17664
Nudt6	A_52_P1067757	2.41931	A_52_P257041	1.66133
Rph3al	A_52_P396401	2.32953	A_52_P396401	1.95434
AI447904	A_51_P334785	2.23298	A_52_P563280	1.75668
Cyp3a25	A_51_P489367	2.18447	A_51_P489367	1.66236
Chit1	A_51_P253074	2.12315	A_51_P253074	1.51971
MGC58416	A_51_P284125	2.08385	A_51_P284125	1.44477
Olfr202	A_51_P354419	2.06351	A_51_P354419	1.56355
H2-D1	A_51_P496996	1.99118	A_52_P246277	1.93784
Cyp2b13	A_51_P492339	1.97875	A_52_P289091	1.48544
9130019P16Rik	A_51_P429974	1.89474	A_52_P279110	1.57592
8030475D13Rik	A_52_P327874	1.89253	A_52_P252760	1.81918
GA_x5J8B7W2BV0-3116-4045	A_51_P283359	1.87073	A_51_P283359	1.61053
Olfr1471	A_52_P645465	1.86974	A_52_P645465	1.89927
Fbxw14	A_51_P277454	1.85923	A_51_P277454	2.72168
A730041O05Rik	A_52_P219704	1.81965	A_52_P539710	1.54056
Slc2a4	A_51_P217498	1.80776	A_51_P217498	1.43705
MGC58416	A_51_P284125	1.80288	A_51_P284125	1.44477
Slc2a4	A_51_P217498	1.79362	A_51_P217498	1.43705
LOC633285	A_52_P580634	1.79032	A_52_P580634	1.94919
Slc2a4	A_51_P217498	1.78037	A_51_P217498	1.43705
Daf2	A_51_P343377	1.77908	A_51_P189115	1.6854
Slc2a4	A_51_P217498	1.77325	A_51_P217498	1.43705
4930424G05Rik	A_52_P322096	1.77106	A_52_P322096	1.54277
Slc2a4	A_51_P217498	1.74819	A_51_P217498	1.43705
Slc2a4	A_51_P217498	1.74543	A_51_P217498	1.43705
Dclre1c	A_51_P369740	1.74412	A_52_P652406	1.47841
Slc2a4	A_51_P217498	1.7387	A_51_P217498	1.43705
Ng23	A_51_P233727	1.72693	A_52_P70064	1.52861
Slc2a4	A_51_P217498	1.726	A_51_P217498	1.43705
Slc2a4	A_51_P217498	1.71739	A_51_P217498	1.43705
Gtse1	A_51_P195153	1.70355	A_51_P195153	2.2691
Slc2a4	A_51_P217498	1.70292	A_51_P217498	1.43705
Ng23	A_52_P70064	1.66394	A_52_P70064	1.52861
MGC58416	A_51_P284125	1.65428	A_51_P284125	1.44477
C330018K18Rik	A_52_P106766	1.63635	A_52_P106766	1.47567
Olfr1307	A_51_P362554	1.63044	A_51_P362554	2.55519
Pank1	A_51_P123320	1.61563	A_51_P123320	1.50361
Pax1	A_51_P145322	1.56026	A_51_P145322	2.74596
Glp2r	A_52_P122654	1.54989	A_52_P122654	1.59914
24 h Downregulated
B230206H07Rik	A_52_P634098	0.392669	A_52_P634098	0.174113
Lctl	A_51_P336070	0.472501	A_51_P336070	0.602511
NAP067549-1	A_52_P536260	0.516029	A_52_P536260	0.491832
AK082644	A_52_P84065	0.523576	A_52_P84065	0.569266
Ear10	A_51_P268535	0.567948	A_51_P268535	0.640252
Oprm1	A_51_P100309	0.582474	A_52_P498441	0.616858
Tmprss5	A_51_P516741	0.583337	A_51_P516741	0.503812
Duox1	A_51_P475138	0.586913	A_51_P475138	0.583549
Egr2	A_51_P173043	0.588655	A_51_P173043	0.361329
AB041803	A_52_P26265	0.591424	A_52_P26265	0.258854
Gulo	A_52_P120510	0.600876	A_51_P290626	0.46701
Il1rap	A_52_P207374	0.603053	A_52_P467232	0.456147
Egr2	A_51_P173043	0.603941	A_51_P173043	0.361329
Egr2	A_51_P173043	0.604915	A_51_P173043	0.361329
Egr2	A_51_P173043	0.605046	A_51_P173043	0.361329
Egr2	A_51_P173043	0.605355	A_51_P173043	0.361329
Egr2	A_51_P173043	0.607488	A_51_P173043	0.361329
Egr2	A_51_P173043	0.608864	A_51_P173043	0.361329
Egr2	A_51_P173043	0.611332	A_51_P173043	0.361329
Egr2	A_51_P173043	0.612364	A_51_P173043	0.361329
Egr2	A_51_P173043	0.620517	A_51_P173043	0.361329
4930528G09Rik	A_51_P115526	0.621916	A_51_P115526	0.701293
5330421F07Rik	A_52_P551829	0.632345	A_52_P551829	0.471209
Egr1	A_51_P367866	0.636169	A_51_P367866	0.588736
5430414B12Rik	A_52_P458806	0.638628	A_52_P458806	0.468676
Tmem10	A_51_P262563	0.658154	A_52_P624415	0.633342
Npsr1	A_52_P122891	0.65947	A_52_P571326	0.603681
Lama4	A_52_P78714	0.668785	A_52_P7554	0.604299
