# Supplementary material for: Transcriptomics and proteomics analyses of the PACAP38 influenced ischemic brain in permanent middle cerebral artery occlusion model mice
Source: J Neuroinflammation. 2012 Nov 23;9:256. doi: 10.1186/1742-2094-9-256 (PMC3526409; doi:10.1186/1742-2094-9-256)
Supplement: Additional file 11 — Table S5. Effect of PACAP 38 injection on expression of genes at 6 h with a focus on PACAP and ischemia. [file 1742-2094-9-256-S11.xlsx]

## Sheet: Suppl Table 5
Supplementary Table 5: Efect of PACAP38 injection on expression of genes at 6 h with a focus on PACAP and ischemia.
6 h Upregulated
S100a5	A_51_P108812	3.06553	A_51_P108812	5.82568
Clca1	A_52_P669035	2.93217	A_52_P669035	1.96799
Lepr	A_51_P396045	2.70444	A_51_P396045	1.96476
Clca2	A_51_P265806	2.63912	A_51_P265806	1.80934
Dnase2b	A_51_P166099	2.39242	A_51_P166099	1.58891
Pi4k2b	A_51_P230987	2.38687	A_52_P353567	1.74194
B230120H23Rik	A_52_P522379	2.32713	A_52_P522379	1.92313
Tmod3	A_52_P188782	2.20015	A_52_P450780	1.74877
Nfya	A_51_P514126	2.19903	A_51_P514126	2.13241
AK038372	A_52_P963559	2.1652	A_52_P963559	1.47692
Slc25a15	A_51_P510437	2.15722	A_51_P510437	2.73926
Lepr	A_51_P396045	2.13889	A_51_P396045	1.96476
Itgax	A_51_P303424	2.05928	A_51_P303424	1.454
Eomes	A_51_P332309	2.04874	A_51_P332309	2.83672
Gabra6	A_51_P198335	52.6958	A_51_P198335	2.42464
Pax1	A_51_P145322	1.98579	A_51_P145322	1.76149
Shprh	A_52_P488814	2.11851	A_51_P329084	1.56973
6430701C03Rik	A_52_P614860	1.78937	A_52_P614860	1.62408
Ccl7	A_51_P436652	1.89009	A_51_P436652	2.44818
Ccl7	A_52_P208763	1.85785	A_51_P436652	2.44818
Ryr3	A_52_P521605	1.79049	A_52_P521605	2.28363
4930485B16Rik	A_52_P24980	1.78707	A_52_P24980	1.58855
Pax1	A_51_P145322	1.77312	A_51_P145322	1.76149
Nfrkb	A_52_P43456	1.74229	A_51_P117612	1.75173
ENSMUST00000048275	A_52_P31722	1.74115	A_52_P31722	1.91581
BC022651	A_52_P252070	1.71828	A_52_P252070	2.53061
A630005I04Rik	A_52_P24690	1.71713	A_52_P24690	2.32164
D930017K21Rik	A_52_P163201	1.70537	A_52_P163201	1.88983
Pcdh21	A_51_P173114	1.65246	A_51_P173114	1.98231
Pax1	A_51_P145322	1.6514	A_51_P145322	1.76149
4931407G18Rik	A_51_P127320	1.64736	A_51_P127320	1.71791
NAP070416-1	A_52_P496022	1.63401	A_52_P496022	2.53675
ENSMUST00000059708	A_52_P1109396	1.57769	A_52_P1109396	3.07789
Troap	A_52_P571715	1.56205	A_52_P633714	2.05263
Ccl2	A_51_P286737	1.56099	A_51_P286737	2.00741
Zfp60	A_52_P504677	1.53872	A_51_P437666	2.07077
Ccl2	A_51_P286737	1.53736	A_51_P286737	2.00741
4930465A12Rik	A_51_P411495	1.53465	A_51_P411495	2.31065
Ccl2	A_51_P286737	1.51874	A_51_P286737	2.00741
AK033083	A_51_P328944	1.51813	A_51_P328944	2.13303
Ccl2	A_51_P286737	1.51672	A_51_P286737	2.00741
Ccl2	A_51_P286737	1.49573	A_51_P286737	2.00741
Ccl2	A_51_P286737	1.48479	A_51_P286737	2.00741
6 h Downregulated
Pax1	A_51_P145322	0.514306	A_51_P145322	0.610715
Foxl1	A_51_P224485	0.57741	A_51_P224485	0.368681
Spag17	A_51_P232617	0.469533	A_51_P232617	0.484447
Wt1	A_52_P673458	0.607244	A_52_P673458	0.516871
9030625N01Rik	A_51_P267159	0.446859	A_51_P267159	0.678386
Ret	A_51_P324191	0.509035	A_51_P324191	0.554736
Ret	A_51_P324191	0.564319	A_51_P324191	0.554736
A330041D05Rik	A_51_P328266	0.637736	A_51_P328266	0.550032
4732456N10Rik	A_51_P345022	0.585649	A_51_P345022	0.406068
Slc6a4	A_51_P496253	0.282716	A_51_P496253	0.192186
Nr3c2	A_51_P377914	0.630759	A_52_P264543	0.442746
Arhgap19	A_51_P466364	0.533215	A_52_P213207	0.520825
Asb16	A_51_P488704	0.563779	A_52_P326468	0.605322
Anapc1	A_52_P117491	0.557488	A_52_P427265	0.610387
C1r	A_52_P114260	0.480411	A_52_P114260	0.623575
1110032E23Rik	A_52_P11479	0.526888	A_52_P11479	0.507687
D730027C18Rik	A_52_P1156327	0.528415	A_52_P1156327	0.326882
A430106F12Rik	A_52_P59346	0.567929	A_52_P59346	0.545838
AK018271	A_52_P316728	0.568939	A_52_P316728	0.481403
Tph2	A_52_P673043	0.37803	A_52_P673043	0.302039
Nr3c2	A_52_P378137	0.653133	A_52_P264543	0.442746
Olfr871	A_52_P669986	0.496657	A_52_P669986	0.340064
NAP042543-1	A_52_P578159	0.515572	A_52_P578159	0.49044
AK085324	A_52_P964148	0.504251	A_52_P964148	0.41781
