# Supplementary material for: Transcriptomics and proteomics analyses of the PACAP38 influenced ischemic brain in permanent middle cerebral artery occlusion model mice
Source: J Neuroinflammation. 2012 Nov 23;9:256. doi: 10.1186/1742-2094-9-256 (PMC3526409; doi:10.1186/1742-2094-9-256)
Supplement: Additional file 13 — Table S7. The functionally categorized (pathway- or specific disease states-focused gene classifications) upregulated genes at 6 h. [file 1742-2094-9-256-S13.xlsx]

## Sheet: Suppl Table 7
Supplementary Table 7
Amino Acid Metabolism I
	Nos2	Arginine Metabolism	1.62374
Neuroscience Ion Channels & Transporters
	Clca1	Chloride Channel	2.93217
DNA Damage Signaling Pathway
	Gadd45a	Cell Cycle: Cell Cycle Arrest	1.45047
DNA Repair
	Brip1	Nucleotide Excision Repair (NER)	1.66169
Drug Metabolism: Phase II
	Baat	Amino Acid Transferases	2.26829
Glycosylation
	Mgat5	N-Acetylglucosaminyltransferases	1.58505
	Mgat5	N-Linked Glycosylation
Neurotoxicity
	Fasl	Up-Regulated: Apoptosis	2.12016
	Fasl	Up-Regulated: Signal Transduction
Parkinson's Disease
	Gria3	Ion Transport	1.5923
	Gria3	Transporters
Terminal Differentiation Markers
	Mtap2	Nervous System: Mature Neuron	1.77099
	Fabp4	Adipocyte	1.54512
Cell Lineage Identification
	Dcx	Progenitors: Ectoderm: Immature Neuron	2.68832
	Myl3	Terminal Differentiation: Mesoderm: Cardiomyocyte	1.50543
Embryonic Stem Cells
	Eomes	Selected Embryonic Stem Cell Differentiation / Lineage Markers: Trophoblast Markers	2.04874
	Runx2	Selected Embryonic Stem Cell Differentiation / Lineage Markers: Bone	1.67036
MAP Kinase Signaling Pathway
	Egfr	Activated Transcription Factors	1.91094
	Hspb1	Genes with Induced Expression	1.64308
Polycomb & Trithorax Complexes
	Cbx3	Polycomb Cofactors: Complex Interacting Genes	1.8555
	Asxl1	Polycomb Cofactors: Complex Interacting Genes	1.79084
Polycomb & Trithorax Target Genes
	Hs6st2	Cellular Mechanisms: Other	2.58613
	Atf3	Cellular Functions: Transcription Factors	1.59789
T Helper Cell Differentiation
	Nr4a3	Transcription Factors	2.72733
	Nr4a3	Epigenetically Regulated Genes: Inducible and Natural Regulatory T (iTreg and nTreg) Cells
Transcription Factors
	Smad5	TGFβ / BMP Signaling Pathway	2.26381
	Atf3	Other Transcription Factors	1.59789
VEGF Signaling
	Ptgs2	Others	1.72356
	Hspb1	Heat Shock Proteins	1.64308
Adipogenesis
	Egr2	Adipogenesis Regulation Pro-White Adipose Tissue	1.73002
	Fabp4	PPAR Gamma Targets	1.54512
	Fabp4	Adipogenesis Regulation Pro-Adipogenesis
Fatty Acid Metabolism
	Cpt1b	Fatty Acid Catabolism Carnitine Transferases	2.18769
	Cpt1b	Fatty Acid Transport
	Fabp4	Fatty Acid Transport	1.54512
Epigenetic Chromatin Modification Enzymes
	Myst4	Histone Acetyltransferase	1.77232
	Myst2	Histone Acetyltransferase	1.99396
	Nsd1	SET Domain Proteins (Histone Methyltransfesase Activity)	1.81091
Epigenetic Chromatin Remodeling Factors
	Cbx3	Chromobox / Heterochromatin Protein 1 (HP1) Homologs	1.8555
	Nsd1	Plant Homeodomain (PHD) Proteins	1.81091
	Asxl1	Polycomb Group Genes	1.79084
Antiviral Response
	Il6	Toll-Like Receptor Signaling: Responsive Genes	4.37786
	Il1b	Toll-Like Receptor Signaling: Responsive Genes	2.55613
	Il1b	Nod-Like Receptor Signaling: Responsive Genes
Signal Transduction PathwayFinder
	Ptgs2	Phospholipase C Pathway	1.72356
	Nos2	Jak-Stat Pathway	1.62374
	Ccl2	LDL Pathway	1.56099
Stem Cell Signaling
	Smad5	TGFβ Superfamily Signaling Pathway: Transcription Factors & Cofactors	2.26381
	Notch2	Notch Signaling Pathway: Receptors & Coreceptors	1.98945
	Tgfbr2	TGFβ Superfamily Signaling Pathway: Receptors & Coreceptors	1.66504
Drug Transporters
	Slc16a1	SLC Transporters Involved in Drug Transport	1.67103
	Slco1a4	SLC Transporters Involved in Drug Transport	1.47259
	Slc15a2	SLC Transporters Involved in Drug Transport	1.46975
Heat Shock Proteins
	Hspa1a	HSP70 Family Members	2.30569
	Hspb1	Small HSPs	1.64308
	Hsp110	Other Regulators of Protein Folding	1.46074
Neurotransmitter Receptors and Regulators
	Gabra6	Neurotransmitter Receptors: GABA-A Receptors	52.6958
	Chrna3	Neurotransmitter Receptors: Other Neurotransmitter Receptors	1.8721
	Galr1	Neurotransmitter Receptors: Gastrin Receptors	1.84562
Stress Response to Cellular Damage
	Hspa1a	Molecular Chaperones: Heat Shock Proteins	2.30569
	Cyp7a1	Xenobiotic Metabolism: Cytochrome P450s	1.69919
	Hspb1	Molecular Chaperones: Heat Shock Proteins	1.64308
Telomeres & Telomerase
	Igf1	Telomere Regulation: Telomerase Regulation	2.15051
	Bcl2	Telomere Regulation: Telomerase Regulation	1.67242
	Dclre1c	Telomere Maintenance	1.63215
Unfolded Protein Response
	Insig1	Regulation of Cholesterol Metabolism	1.63564
	Ppp1r15b	Regulation of Translation	1.48042
	Ppp1r15b	Apoptosis
mTOR Signaling
	Igf1	mTOR Upstream Regulators mTORC1 Positive Regulators	2.15051
	Igf1	Cellular Processes Growth Factor Response
	Ppp2r2b	mTOR Downstream mTORC1 Negative Regulation	1.44537
	Ppp2r2b	Cellular Processes Translation
Obesity
	Il6	Anorectic Genes Neuropeptides and Receptors	4.37786
	Lepr	Anorectic Genes Adipocyte-derived Peptides and Receptors	2.70444
	Il1b	Anorectic Genes Neuropeptides and Receptors	2.55613
	Galr1	Orexigenic Genes Neuropeptides and Receptors	1.84562
Primary Cilia
	Igf1	Cellular Signaling mTOR	2.15051
	Igf1	Cell Cycle
	Ift80	Intraflagellar Transport (IFT)	1.99474
	Cdk5rap2	Cell Cycle	1.88062
Wound Healing
	Il6	Inflammatory Cytokines & Chemokines	4.37786
	Igf1	Growth Factors	2.15051
	Itga1	Extracellular Matrix & Cell Adhesion Cellular Adhesion	2.03064
	Egfr	Signal Transduction Receptors	1.91094
Alzheimer’s Disease
	A2m	Beta-Amyloid Generation, Oligomerization, Clearance, and Degradation: Other Genes Involved in Beta-Amyloid Metabolism	1.87538
	Mtap2	Beta-Amyloid Generation, Oligomerization, Clearance, and Degradation: Microtubule and Cytoskeleton Reorganization	1.77099
	Lrp1	Beta-Amyloid Generation, Oligomerization, Clearance, and Degradation: Beta-Amyloid Clearance Through Endocytosis	1.63161
	Lrp1	Lipid and Lipoprotein Metabolism
Autophagy
	Igf1	Regulation of Autophagy: Co-Regulators of Autophagy and Apoptosis	2.15051
	Bcl2	Regulation of Autophagy: Co-Regulators of Autophagy and Apoptosis	1.67242
	Atg7	Autophagy Machinary Components: Genes Responsible for Protein Transport	1.64003
	Atg7	Autophagy Machinary Components: Genes Involved in Protein Ubiquitination
Cell Death PathwayFinder
	Igf1	Autophagy	2.15051
	Bcl2	Apoptosis and Autophagy	1.67242
	Atg7	Autophagy	1.64003
	Gadd45a	Apoptosis: Pro-Apoptotic	1.45047
PI3K-AKT Signaling
	Igf1	IGF-1 Signaling Pathway	2.15051
	Fasl	PTEN Dependent Cell Cycle Arrest and Apoptosis	2.12016
	Chuk	Other Genes Involved in the AKT Signaling Pathway	1.64518
	Hspb1	AKT and PI3K Family Members and Their Regulators	1.64308
Protein Phosphatases
	Cdc25a	Cell Cycle Phosphatase	1.71874
	Ptpn22	Protein Tyrosine Phosphatases: Non-Receptor Type	1.6574
	Ptprz1	Protein Tyrosine Phosphatases: Receptor Type	1.48296
	Ptpn4	Protein Tyrosine Phosphatases: Non-Receptor Type	1.63862
Diabetes
	Il6	Secreted Factors	4.37786
	Ccr2	Receptors, Transporters & Channels	2.56147
	Slc14a2	Receptors, Transporters & Channels	1.88019
	Trib3	Signal Transduction	1.78111
	Pfkfb3	Metabolic Enzymes	1.68162
Oxidative Stress and Antioxidant Defense
	Il22	Genes Involved in Reactive Oxygen Species (ROS) Metabolism Other Genes Involved in ROS Metabolism	2.96362
	Ptgs2	Antioxidants Glutathione Other Peroxidases	1.72356
	Nos2	Genes Involved in Reactive Oxygen Species (ROS) Metabolism Other Genes Involved in Superoxide Metabolism	1.62374
	Zmynd17	Antioxidants Glutathione Other Antioxidants	1.60521
	Ppp1r15b	Genes Involved in Reactive Oxygen Species (ROS) Metabolism Oxidative Stress Responsive Genes	1.48042
Stress & Toxicity
	Il6	Inflammation	4.37786
	Cyp2a5	Oxidative or Metabolic Stress	3.13307
	Il1b	Inflammation	2.55613
	Cyp7a1	Oxidative or Metabolic Stress	1.69919
	Gadd45a	Growth Arrest and Senescence	1.45047
Stress & Toxicity PathwayFinder
	Il6	Inflammation	4.37786
	Cyp2a5	Oxidative or Metabolic Stress	3.13307
	Il1b	Inflammation	2.55613
	Cyp7a1	Oxidative or Metabolic Stress	1.69919
	Gadd45a	Growth Arrest and Senescence	1.45047
Apoptosis
	Pak7	Anti-Apoptosis	2.34765
	Arc	Anti-Apoptosis	1.86376
	Bcl2	Bcl-2 Family	1.67242
	Bcl2	p53 and DNA Damage-Induced Apoptosis
	Bcl2	Anti-Apoptosis
Interferon (IFN) and Receptor
	Il6	Interferons: Other Genes Related to Interferons	4.37786
	Lepr	Interferon Receptors: Other Hematopoietin and Interferon-class (D200-domain) Cytokine Receptors	2.70444
	Cxcl10	Interferon-Inducible Proteins: Other Interferon-Inducible Genes	1.84805
	Ifi204	Interferon-Inducible Proteins: Transcriptional Regulators	1.61221
	Ifi44	Interferon-Inducible Proteins: Other Interferon-Inducible Genes	1.51151
Cell Motility
	Igf1	Growth Factors	2.15051
	Egfr	Receptors	1.91094
	Egfr	Adhesion: Cell-Cell Adhesion
	Egfr	Cellular Projections: Filopodia
	Egfr	Cellular Projections: Lammelipodia
Cell Surface Markers
	Ms4a1	B-cell Surface Markers: Mature B-cells	2.50968
	Itga1	T-cell surface markers: Activated T-cells	2.03064
	Itga1	Monocyte and Macrophage Cell Surface Markers: Other Monocyte and Macrophage Surface Markers
	Ncam1	Natural Killer (NK) Cell Surface Markers	1.57647
	S100a8	Monocyte and Macrophage Cell Surface Markers: Other Monocyte and Macrophage Surface Markers	1.70187
Drug Metabolism: Phase I Enzymes
	Cyp2a5	Cytochrome P450s	3.13307
	Gzmb	Esterases	1.75429
	Cyp7a1	Cytochrome P450s	1.69919
	Dclre1c	Telomere Maintenance	1.63215
	Aldh1a3	Aldehyde Dehydrogenases	1.58591
Hepatotoxicity
	Serpine1	Necrosis: Up-Regulated	1.83185
	S100a8	Phospholipidosis: Up-Regulated	1.70187
	Btg2	Hepatotoxicity: Up-Regulated	1.47172
	Btg2	Nongenotoxic Hepatocarcinogenicity: Up-Regulated
	Gadd45a	Hepatotoxicity: Up-Regulated	1.45047
Homeobox (HOX) Genes
	Msx2	Skeletal Development	2.13361
	Shox2	Brain & Nervous System Development: Nervous System Development	1.67937
	Shox2	Skeletal Development
	Shox2	Heart Development
	En2	Other HOX Genes Involved In Multicellular Organismal Development	1.56149
Ubiquitination (Ubiquitylation) Pathway
	Ube2t	Ubiquitin-Conjugating Enzymes (E2): Other Ubiquitin-Conjugating Enzymes (E2)	2.21459
	Ube2t	Ubiquitin-Protein Ligases (E3): Other Ubiquitin-Protein Ligases (E3)
	Ube2w	Ubiquitin-Conjugating Enzymes (E2): Regulators of Transcription	1.98063
	Huwe1	Ubiquitin-Protein Ligases (E3): Other Ubiquitin-Protein Ligases (E3)	1.68516
	Atg7	Ubiquitin-Activating Enzymes (E1)	1.64003
Lipoprotein Signaling
	Cyp51	Cholesterol Biosynthesis	1.78933
	Angptl3	Cholesterol Homeostasis	1.7299
	Cyp7a1	Cholesterol Catabolism	1.69919
	Insig1	Other Genes Involved in Cholesterol Metabolism	1.63564
	Nsdhl	Cholesterol Biosynthesis	1.53064
	Idi1	Cholesterol Biosynthesis	1.5055
Common Cytokines
	Il1b	Interleukins	2.55613
	Inhba	Bone Morphogenic Proteins (BMPs) and TGF-β Family	2.0124
	Tnfsf14	TNF Superfamily	1.88228
	Bmp5	Bone Morphogenic Proteins (BMPs) and TGF-β Family	1.61087
	Il11	Interleukins	1.57186
	Inha	Bone Morphogenic Proteins (BMPs) and TGF-β Family	1.54984
Fibrosis
	Ccr2	Inflammatory Cytokines & Chemokines	2.56147
	Il1b	Inflammatory Cytokines & Chemokines	2.55613
	Itga1	Extracellular Matrix & Cell Adhesion: Cellular Adhesion	2.03064
	Mmp8	Extracellular Matrix & Cell Adhesion: Remodeling Enzymes	1.89641
	Thbs1	Signal Transduction: TGFß Superfamily	1.82848
	Tgfbr2	Signal Transduction: TGFß Superfamily	1.66504
T Cell Activation
	Ms4a1	B-cell Activation: Other Genes Involved in B-cell Activation	2.50968
	Tnfsf14	T-cell Activation: Regulators of T-Cell Activation	1.88228
	Tnfsf14	T-cell Activation: T-Cell Proliferation
	Nos2	T-cell Activation: T-Cell Differentiation	1.62374
	Il11	B-cell Activation: B-cell Differentiation	1.57186
	Inha	B-cell Activation: B-cell Differentiation	1.54984
Angiogenesis
	Il6	Other factors involved in angiogenesis: Cytokines and chemokines	4.37786
	Il1b	Other factors involved in angiogenesis: Cytokines and chemokines	2.55613
	Smad5	Angiogenic factors: Transcription factors and others	2.26381
	Igf1	Other factors involved in angiogenesis: Other growth factors and receptors	2.15051
	Thbs1	Angiogenic factors: Adhesion molecules	1.82848
	Ccl2	Other factors involved in angiogenesis: Cytokines and chemokines	1.56099
Cell Cycle
	Notch2	Cell Cycle Checkpoint and Cell Cycle Arrest	1.98945
	Cdc25a	M Phase	1.71874
	Inha	Cell Cycle Checkpoint and Cell Cycle Arrest	1.54984
	Inha	Negative Regulation of the Cell Cycle
	Gadd45a	Cell Cycle Checkpoint and Cell Cycle Arrest	1.45047
	Gadd45a	Regulation of the Cell Cycle
Epithelial to Mesenchymal Transition (EMT)
	Egfr	Cell Growth & Proliferation	1.91094
	Egfr	Migration & Motility
	Egfr	Extracellular Matrix & Cell Adhesion
	Egfr	Signaling Pathways: Receptor Tyrosine Kinase
	Serpine1	Genes Up-Regulated During EMT	1.83185
	Serpine1	Extracellular Matrix & Cell Adhesion
Mitochondria
	Cpt1b	Mitochondrial Transport	2.18769
	Slc25a15	Small Molecule Transport	2.15722
	Bcl2	Membrane Polarization & Potential	1.67242
	Bcl2	Mitochondrial Transport
	Bcl2	Apoptotic Genes
	Immp1l	Inner Membrane Translocation	1.60951
Nitric Oxide Signaling Pathway
	Ptx3	Genes Involved in Nitric Oxide (NO) Biosynthesis: Positive Regulators of NO Biosynthesis	2.12247
	Nos2	Genes Involved in Nitric Oxide (NO) Biosynthesis: Genes with Nitric Oxide Synthase Activity	1.62374
	Nos2	Genes Involved in Nitric Oxide (NO) Biosynthesis: Genes with Oxidoreductase Activity
	Nos2	Genes Involved in Superoxide Metabolism: Genes with Oxidoreductase Activity
	Ppp1r15b	Genes Involved in Response to Oxidative Stress: Other Genes Involved in Oxidative Stress	1.48042
	Gadd45a	Genes Induced by Nitric Oxide: Cell Cycle Genes	1.45047
Nuclear Receptors and Coregulators
	Notch2	Other Transcription Factors & Regulators	1.98945
	Nr1i3	Androgen Receptors & Related Molecules	1.63005
	Nr1i3	Thyroid Hormone Receptors & Related Molecules
	Nr1i3	Positive Regulators of Transcription
	Nr3c1	Glucocorticoid Receptors & Related Molecules	1.51312
	Nr3c1	Other Transcription Factors & Regulators
Tumor Necrosis Factor (TNF) Ligand and Receptor\n
	Fasl	TNF Superfamily Members: Other TNF Superfamily Members	2.12016
	Tnfrsf7	TNF Receptor Superfamily Members: Other Apoptosis Genes	1.98635
	Tnfsf14	TNF Superfamily Members: Other TNF Superfamily Members	1.88228
	Bcl2	Induction of Apoptosis through DR3 and DR4/5 Death Receptors	1.67242
	Chuk	Genes Involved in the TNFR2 Signaling Pathway: Genes Involved in the NF-kappaB Signaling Pathway	1.64518
	Map3k14	Genes Involved in the TNFR2 Signaling Pathway: Other Genes Involved in the TNFR2 Signaling Pathway	1.5235
Insulin Signaling Pathway
	Acaca	Target genes for SREBP1	2.2183
	Serpine1	PI-3 Kinase Pathway Target Genes	1.83185
	Serpine1	Protein Metabolism Other Protein Metabolism Genes
	Nos2	MAPK Pathway Target Genes	1.62374
	Nos2	Protein Metabolism Other Protein Metabolism Genes
	Nos2	Cell Growth and Differentiation Cell Proliferation
	Braf	MAPK Pathway Components	1.70776
Th17 for Autoimmunity & Inflammation
	Il6	Cytokines	4.37786
	Il22	Cytokines	2.96362
	Il1b	Cytokines	2.55613
	Il25	Cytokines	2.29138
	Ccl7	Chemokines	1.89009
	Jak2	Signaling Pathway Molecules and Transcriptional Factors	1.62802
	Ccl2	Chemokines	1.56099
Inflammasomes
	Il6	NOD-Like Receptors: Downstream Signaling	4.37786
	Il1b	Inflammasomes: Downstream Signaling	2.55613
	Ccl7	NOD-Like Receptors: Downstream Signaling	1.89009
	Tnfsf14	Inflammasomes: Negative Regulation	1.88228
	Ptgs2	Inflammasomes: Downstream Signaling	1.72356
	Bcl2	Inflammasomes: Negative Regulation	1.67242
	Chuk	NOD-Like Receptors: Downstream Signaling	1.64518
Estrogen Receptor Signaling
	Il6	Genes Associated with Breast Cancer Prognosis	4.37786
	Egfr	Genes Associated with Breast Cancer Prognosis	1.91094
	Thbs1	Genes Directly Associated with Breast Cancer	1.82848
	Cd44	Genes Associated with the Response to Chemotherapy	1.74894
	Bcl2	Genes Associated with Breast Cancer Prognosis	1.67242
	Bcl2	Genes Associated with the Response to Chemotherapy
	Hspb1	Genes Associated with the Estrogen Receptor Signaling Pathway	1.64308
p53 Signaling Pathway
	Il6	Cell Growth, Proliferation and Differentiation: Cytokines	4.37786
	Il6	Cell Motility and Adhesion: Extracellular Matrix (ECM) Proteins
	Cdc25a	Apoptosis: Other Genes Related to the Cell Cycle	1.71874
	Bcl2	Apoptosis: Anti-apoptosis	1.67242
	Btg2	Apoptosis: Regulation of Apoptosis	1.47172
	Btg2	Cell Growth, Proliferation and Differentiation: Cell Differentiation
	Gadd45a	Apoptosis: Cell Cycle: Cell Cycle Arrest	1.45047
Skeletal Muscle: Myogenesis & Myopathy
	Il6	Skeletal Muscle Autocrine Signaling	4.37786
	Il1b	Skeletal Muscle Wasting/Atrophy Dystrophy	2.55613
	Igf1	Skeletal Myogenesis	2.15051
	Igf1	Skeletal Muscle Hypertrophy
	Igf1	Skeletal Muscle Autocrine Signaling
	Dmd	Skeletal Myogenesis	2.47164
	Bcl2	Skeletal Myogenesis	1.67242
	Nos2	Skeletal Muscle Wasting/Atrophy Autophagy	1.62374
Hedgehog Signaling Pathway
	Mtss1	Regulators of Development: Nervous system development	1.70164
	Shox2	Genes Involved in Hedgehog Signaling Pathway: Smoothened Signaling Pathway	1.67937
	Shox2	Regulators of Development: Other Regulators for Multi-cellular Organism Development
	Runx2	Genes Involved in Hedgehog Signaling Pathway: Smoothened Signaling Pathway	1.67036
	Runx2	Regulators of Cell Differentiation
	Runx2	Regulators of Development: Other Regulators for Multi-cellular Organism Development
	Bmp5	Genes Involved in Hedgehog Signaling Pathway: Other Genes Invovled in Hedgehog Signaling Pathway	1.61087
	Bmp5	Regulators of Development: Cartilage Development
Mesenchymal Stem Cell
	Il6	Other Genes Associated with MSC	4.37786
	Il1b	Other Genes Associated with MSC	2.55613
	Sox9	MSC Differentiation Markers: Gene involved in Myogenesis	2.50826
	Igf1	Other Genes Associated with MSC	2.15051
	Itgax	MSC Differentiation Markers: Gene involved in Chondrogenesis	2.05928
	Cd44	MSC-Specific Markers	1.74894
	Runx2	MSC Differentiation Markers: Gene involved in Osteogenesis	1.67036
	Runx2	MSC Differentiation Markers: Gene involved in Adipogenesis
Fibrosis
	Ccr2	Inflammatory Cytokines & Chemokines	2.56147
	Il1b	Inflammatory Cytokines & Chemokines	2.55613
	Ccl3	Pro-Fibrotic	2.47255
	Ccl3	Inflammatory Cytokines & Chemokines
	Itga1	Extracellular Matrix & Cell Adhesion Cellular Adhesion	2.03064
	Mmp8	Extracellular Matrix & Cell Adhesion Remodeling Enzymes	1.89641
	Serpine1	Epithelial-to-Mesenchymal Transition	1.83185
	Thbs1	Signal Transduction TGFß Superfamily	1.82848
	Tgfbr2	Signal Transduction TGFß Superfamily	1.66504
Hypertension
	Ptgs2	Vasoconstriction	1.72356
	Ptgs2	Smooth Muscle Contraction
	Ptgs2	Blood Pressure Regulation
	Ednra	Vasoconstriction	1.5358
	Ednra	Smooth Muscle Contraction
	Ednra	Hypoxia Response
	Adm	Vasodilation	1.43514
	Adm	Vasoconstriction
	Adm	Hypoxia Response
Cellular Senescence
	Igf1	Senescence Initiators: Insulin Growth Factor (IGF) Related	2.15051
	Thbs1	Senescence Responses: Cytoskeleton Related	1.82848
	Thbs1	Senescence Responses: Cell Adhesion
	Cd44	Senescence Responses: Cell Adhesion	1.74894
	Aldh1a3	Senescence Initiators: p53/pRb Signaling (Cell cycle)	1.58591
	Aldh1a3	Senescence Initiators: Interferon Related
	Aldh1a3	Senescence Initiators: Oxidative Stress
	Aldh1a3	Senescence Responses: p53 Effectors
	Gadd45a	Senescence Initiators: DNA Damage	1.45047
Chemokines & Receptors
	Ccr2	Chemokine (C-C motif) Receptors	2.56147
	Il8rb	Other Chemokines and Related Genes	2.24008
	Ccl4	Chemokine (C-C motif) Ligands	2.04536
	Ccl7	Chemokine (C-C motif) Ligands	1.89009
	Tnfsf14	Other Chemokines and Related Genes	1.88228
	Cxcl10	Chemokine (C-X-C motif) Ligands	1.84805
	Ccl9	Chemokine (C-C motif) Ligands	1.64867
	Ccl2	Chemokine (C-C motif) Ligands	1.56099
	Inha	Other Chemokines and Related Genes	1.54984
Th1-Th2-Th3
	Il6	CD4+T Cell Markers	4.37786
	Il6	Other Immune Response Genes
	Ccr2	TH2 Cytokines and Related Genes	2.56147
	Ccr2	Other Immune Response Genes
	Ccl7	TH2 Cytokines and Related Genes	1.89009
	Ccl7	Other Immune Response Genes
	Jak2	CD4+T Cell Markers	1.62802
	Inha	Immune Cell Activation: B-cell Activation	1.54984
	Inha	T-helper 1 Type Immune Response
Extracellular Matrix and Adhesion Molecules
	Itgax	Cell Adhesion Molecules: Cell-Matrix Adhesion	2.05928
	Mmp8	Extracellular Matrix Proteins (ECM): ECM Proteases	1.89641
	Thbs1	Cell Adhesion Molecules: Other Adhesion Molecules	1.82848
	Thbs1	Extracellular Matrix Proteins (ECM): Other ECM Molecules
	Ncam1	Cell Adhesion Molecules: Transmembrane Molecules	1.57647
	Cd44	Cell Adhesion Molecules: Transmembrane Molecules	1.74894
	Adamts1	Extracellular Matrix Proteins (ECM): ECM Proteases	1.61044
	Col5a1	Cell Adhesion Molecules: Other Adhesion Molecules	1.60278
	Col5a1	Extracellular Matrix Proteins (ECM): Collagens and ECM Structural Constituents
Notch Signaling Pathway
	Notch2	Other Genes Involved in the Notch Signaling Pathway: Apoptosis Genes	1.98945
	Notch2	Other Genes Involved in the Notch Signaling Pathway: Cell Cycle Regulators
	Notch2	Other Genes Involved in the Notch Signaling Pathway: Cell Growth and Migration
	Notch2	Other Genes Involved in the Notch Signaling Pathway: Cell Proliferation
	Notch2	Other Genes Involved in the Notch Signaling Pathway: Genes Regulating Cell Differentiation
	Notch2	Other Genes Involved in the Notch Signaling Pathway: Neurogenesis
	Notch2	Other Genes Involved in the Notch Signaling Pathway: Regulation of Transcription
	Cd44	Notch Signaling Pathway Target Genes: Others with Unspecified Functions	1.74894
	Chuk	Notch Signaling Pathway Target Genes: Others with Unspecified Functions	1.64518
G Protein Coupled Receptors
	Lepr	Others	2.70444
	Ccr2	Chemokine & Cytokine Receptors	2.56147
	Gipr	Others	2.31344
	Il8rb	Chemokine & Cytokine Receptors	2.24008
	Gpr171	Orphan G Protein-Coupled Receptors	2.08712
	Galr1	Galanin Receptors	1.84562
	Gpr84	Orphan G Protein-Coupled Receptors	1.62644
	Grik3	Ionotropic Glutamate Receptor	1.74463
	Htr2b	Serotonin (5-Hydroxytryptamine) Receptors	1.56994
	Ednra	Endothelin Receptors	1.5358
Huntington's Disease
	Igf1	Dysregulated Processes: Apoptosis	2.15051
	Egfr	Huntingtin Cofactors	1.91094
	Egfr	Regulation of Synaptic Transmission
	Egfr	Dysregulated Processes: Apoptosis
	Egfr	Dysregulated Processes: Oxidation / Reduction
	Cd44	Transcription Factor Targets: SP1	1.74894
	Cd44	Dysregulated Processes: Apoptosis
	Syn1	Transcription Factor Targets: SP1	1.56483
	Syn1	Transcription Factor Targets: REST
	Syn1	Synapse
Dendritic and Antigen Presenting Cell
	Il6	Cytokines, Chemokines and Their Receptors	4.37786
	Ccr2	Cytokines, Chemokines and Their Receptors	2.56147
	Ccl3	Cytokines, Chemokines and Their Receptors	2.47255
	Ccl4	Cytokines, Chemokines and Their Receptors	2.04536
	Inhba	Cytokines, Chemokines and Their Receptors	2.0124
	Ccl7	Cytokines, Chemokines and Their Receptors	1.89009
	Cxcl10	Cytokines, Chemokines and Their Receptors	1.84805
	Cd44	Antigen Uptake	1.74894
	Lrp1	Cell Surface Receptors	1.63161
	Ccl2	Cytokines, Chemokines and Their Receptors	1.56099
Inflammatory Cytokines & Receptors
	Ccr2	Chemokine Receptors	2.56147
	Il1b	Cytokine Genes	2.55613
	Ccl3	Chemokine Genes	2.47255
	Il8rb	Chemokine Receptors	2.24008
	Il8rb	Other Genes Involved in Inflammatory Response
	Ccl4	Chemokine Genes	2.04536
	Ccl7	Chemokine Genes	1.89009
	Cxcl10	Chemokine Genes	1.84805
	Ccl9	Chemokine Genes	1.64867
	Il11	Cytokine Genes	1.57186
	Ccl2	Chemokine Genes	1.56099
Synaptic Plasticity
	Igf1	Long Term Depression (LTD)	2.15051
	Inhba	Late Response Genes	2.0124
	Pcdh8	Immediate-Early Response Genes (IEGs)	1.87752
	Pcdh8	Cell Adhesion
	Arc	Immediate-Early Response Genes (IEGs)	1.86376
	Arc	Postsynaptic Density
	Ncam1	Cell Adhesion	1.57647
	Egr2	Immediate-Early Response Genes (IEGs)	1.73002
	Gria3	Long Term Depression (LTD)	1.5923
	Gria3	Neuronal Receptors
	Gria3	Postsynaptic Density
G-Protein-Coupled Receptor Signaling PathwayFinder
	Il1b	Pathways Related to G-Protein-Coupled Receptor Protein Signaling: Rho Pathway	2.55613
	Il1b	Pathways Related to G-Protein-Coupled Receptor Protein Signaling: I?B Kinase / NF?B Cascade
	Serpine1	Pathways Related to G-Protein-Coupled Receptor Protein Signaling: PKC Pathway (Ca2+, MEK, etc.)	1.83185
	Serpine1	Pathways Related to G-Protein-Coupled Receptor Protein Signaling: Rho Pathway
	Ptgs2	Pathways Related to G-Protein-Coupled Receptor Protein Signaling: Rho Pathway	1.72356
	Ptgs2	Pathways Related to G-Protein-Coupled Receptor Protein Signaling: I?B Kinase / NF?B Cascade
	Bcl2	Pathways Related to G-Protein-Coupled Receptor Protein Signaling: PI-3 Kinase Pathway	1.67242
	Nos2	Pathways Related to G-Protein-Coupled Receptor Protein Signaling: G-Protein Signaling, Coupled to cAMP Nucleotide Second Messenger (cAMP / PKA）	1.62374
	Nos2	Pathways Related to G-Protein-Coupled Receptor Protein Signaling: PKC Pathway (Ca2+, MEK, etc.)
	Nos2	Pathways Related to G-Protein-Coupled Receptor Protein Signaling: NO-cGMP Pathway
	Nos2	Pathways Related to G-Protein-Coupled Receptor Protein Signaling: I?B Kinase / NF?B Cascade
Nephrotoxicity
	Ccl3	Up-Regulated: Extracellular Matrix	2.47255
	Ccl3	Up-Regulated: Cytoskeleton
	A2m	Up-Regulated: Other	1.87538
	Cxcl10	Up-Regulated: Proliferation	1.84805
	Cd44	Up-Regulated: Apoptosis	1.74894
	Cd44	Up-Regulated: Extracellular Matrix
	Atf3	Up-Regulated: Proliferation	1.59789
	Btg2	Up-Regulated: Apoptosis	1.47172
	Btg2	Up-Regulated: Proliferation
	Gadd45a	Up-Regulated: Apoptosis	1.45047
	Gadd45a	Up-Regulated: Cell Cycle
Stem Cell Transcription Factors
	Sox9	Ectoderm, Endoderm & Mesoderm Formation & Differentiation	2.50826
	Sox9	Organ Morphogenesis
	Msx2	Embryonic Development	2.13361
	Msx2	Organ Morphogenesis
	Notch2	Axis / Symmetry / Segmentation	1.98945
	Notch2	Embryonic Development
	Notch2	Organ Morphogenesis
	Pax1	Axis / Symmetry / Segmentation	1.98579
	Pax1	Embryonic Development
	Pax1	Organ Morphogenesis
	Lin28b	Other	1.60791
Tumor Metastasis
	Nr4a3	Cell Growth and Proliferation Genes: Receptors	2.72733
	Nr4a3	Transcription Factors and Regulators: Transcription Factors
	Il1b	Cell Cycle Genes: Regulation of the Cell Cycle	2.55613
	Il1b	Cell Growth and Proliferation Genes: Cytokines and Chemokines
	Il8rb	Cell Growth and Proliferation Genes: Receptors	2.24008
	Igf1	Cell Growth and Proliferation Genes: Growth Factors and Hormones	2.15051
	Rorb	Cell Growth and Proliferation Genes: Receptors	1.75757
	Rorb	Transcription Factors and Regulators: Transcription Factors
	Ccl7	Cell Growth and Proliferation Genes: Cytokines and Chemokines	1.89009
	Cd44	Cell Adhesion Genes: Transmembrane Receptors	1.74894
	Mtss1	Cell Adhesion Genes: Other Genes Related to Adhesion	1.70164
Stem Cell
	Igf1	Stem Cell Specific Markers: Cytokines and Growth Factors	2.15051
	Myst2	Stem Cell Specific Markers: Chromosome and Chromatin Modulators	1.99396
	Myst2	Stem Cell Specific Markers: Self-Renewal Markers
	Notch2	Stem Cell Specific Markers: Cell Cycle Regulators	1.98945
	Notch2	Stem Cell Specific Markers: Genes Regulating Symmetric/Asymmetric Cell Division
	Notch2	Signaling Pathways Important for Stem Cell Maintenance: Notch Pathway
	Ncam1	Stem Cell Specific Markers: Cell Adhesion Molecules	1.57647
	Ncam1	Stem Cell Differentiation Markers: Neural Cell Lineage Markers
	Cd44	Stem Cell Specific Markers: Cell Adhesion Molecules	1.74894
	Cd44	Stem Cell Differentiation Markers: Neural Cell Lineage Markers
	Agc1	Stem Cell Specific Markers: Cell Adhesion Molecules	1.66503
	Agc1	Stem Cell Differentiation Markers: Mesenchymal Cell Lineage Markers
Cardiotoxicity
	Il6	Up-Regulated: Angiogenesis	4.37786
	Il6	Up-Regulated: Signal Transduction
	Il6	Up-Regulated: Development
	Il6	Up-Regulated: Metabolism (Regulation & Mechanism):
	Il6	Up-Regulated: Migration / Motility
	Ccl7	Up-Regulated: Migration / Motility	1.89009
	Serpine1	Up-Regulated: Angiogenesis	1.83185
	Rbm3	Up-Regulated: Metabolism (Regulation & Mechanism):	1.8004
	Abhd2	Up-Regulated: Migration / Motility	1.57166
	Btg2	Up-Regulated: Development	1.47172
	Btg2	Up-Regulated: Metabolism (Regulation & Mechanism):
	Nfib	Down-Regulated: Metabolism (Regulation & Mechanism)	1.51895
Growth Factor
	Il6	Apoptosis Regulators	4.37786
	Il1b	Other Growth Factors	2.55613
	Igf1	Apoptosis Regulators	2.15051
	Igf1	Cell Differentiation
	Igf1	Development Controllers: Nervous System Development
	Igf1	Morphogenic Factors
	Inhba	Other Growth Factors	2.0124
	Bmp5	Cell Differentiation	1.61087
	Bmp5	Development Controllers: Skeletal Development
	Bmp5	Development Controllers: Cartilage Development
	Il11	Other Growth Factors	1.57186
	Inha	Other Growth Factors	1.54984
Neurotrophin and Receptors
	Il6	Cell Growth and Differentiation: Growth Factors and Receptors	4.37786
	Il6	Cell Growth and Differentiation: Cytokines and Receptors
	Il6	Apoptosis: Other Apoptosis Genes
	Il6	Immune response: Acute-phase response
	Il1b	Cell Growth and Differentiation: Growth Factors and Receptors	2.55613
	Il1b	Cell Growth and Differentiation: Cell Cycle
	Il1b	Cell Growth and Differentiation: Cell Proliferation
	Il1b	Cell Growth and Differentiation: Cytokines and Receptors
	Il1b	Immune response: Inflammatory response
	Galr1	Neuropeptides and Receptors: Galanin Receptors	1.84562
	Bcl2	Apoptosis: Anti-apoptosis	1.67242
	Hspb1	Apoptosis: Other Apoptosis Genes	1.64308
T-cell Anergy and Immune Tolerance
	Il6	Cytokines, Receptors and their related Proteins	4.37786
	Ccl3	Cytokines, Receptors and their related Proteins	2.47255
	Fasl	Cytokines, Receptors and their related Proteins	2.12016
	Fasl	TNF Superfamily Members and their Receptors
	Eomes	Transcriptional Regulators	2.04874
	Itga1	Other Genes involved in T-cell Anergy	2.03064
	Tnfsf14	T-Cell Regulators	1.88228
	Tnfsf14	Cytokines, Receptors and their related Proteins
	Tnfsf14	TNF Superfamily Members and their Receptors
	Gzmb	Other Genes involved in T-cell Anergy	1.75429
	Ptgs2	Cytokines, Receptors and their related Proteins	1.72356
	Prf1	Cytokines, Receptors and their related Proteins	1.71966
	Egr2	Transcriptional Regulators	1.73002
Toll-Like Receptor Signaling Pathway
	Il6	Pathogen-Specific Responses: Bacterial	4.37786
	Il6	Pathogen-Specific Responses: Viral
	Il6	Downstream Pathways and Target Genes: JAK/STAT Pathway
	Il6	Downstream Pathways and Target Genes: Cytokine-Mediated Signaling Pathway
	Il1b	Pathogen-Specific Responses: Bacterial	2.55613
	Il1b	Downstream Pathways and Target Genes: NFκB Pathway
	Il1b	Downstream Pathways and Target Genes: Cytokine-Mediated Signaling Pathway
	Il1b	Regulation of Adaptive Immunity
	Hspa1a	Pathogen-Specific Responses: Bacterial	2.30569
	Hspa1a	Pathogen-Specific Responses: Fungal/Parasitic
	Nfrkb	Downstream Pathways and Target Genes: NFκB Pathway	1.74229
	Chuk	Downstream Pathways and Target Genes: NFκB Pathway	1.64518
	Ccl2	Downstream Pathways and Target Genes: Cytokine-Mediated Signaling Pathway	1.56099
Atherosclerosis
	Ccr2	Response to Stress Inflammatory Response	2.56147
	Il1b	Response to Stress Inflammatory Response	2.55613
	Il1b	Extracellular Molecules Other Extracellular Molecules
	Il1b	Cell Growth and Proliferation Growth Factors and Receptors
	Il1b	Cell Growth and Proliferation Regulation of the Cell Cycle
	Msr1	Lipid Transport and Metabolism Lipid Transport	2.4769
	Msr1	Lipid Transport and Metabolism Lipoprotein Metabolism
	Itgax	Cell-matrix Ahesion	2.05928
	Serpine1	Extracellular Molecules ECM Protease Inhibitors	1.83185
	Serpine1	Extracellular Molecules ECM Proteases
	Cd44	Other Genes Involved in Adhesion	1.74894
	Bcl2	Anti-apoptosis	1.67242
	Ccl2	Response to Stress Inflammatory Response	1.56099
	Ccl2	Extracellular Molecules Other Extracellular Molecules
NFκB Signaling Pathway
	Il6	NFkB Responsive Genes: Cytokines	4.37786
	Il6	NFkB Responsive Genes: Ligands and Receptors
	Il6	Other Factors Involved in the NFκB Pathway: Ligands and Receptors
	Il1b	Other Factors Involved in the NFκB Pathway: Ligands and Receptors	2.55613
	Il1b	Other Factors Involved in the NFκB Pathway: Inflammatory Response
	Tnfrsf7	Other Factors Involved in the NFκB Pathway: Ligands and Receptors	1.98635
	Tnfsf14	Activation of the NFκB Pathway: Ligands and Receptors	1.88228
	Tgfbr2	Other Factors Involved in the NFκB Pathway: Ligands and Receptors	1.66504
	Tgfbr2	Other Factors Involved in the NFκB Pathway: Kinases
	Chuk	Activation of the NFκB Pathway: Kinases	1.64518
	Chuk	Activation of the NFκB Pathway: IκB kinase and the NFκB Cascade
	Htr2b	Other Factors Involved in the NFκB Pathway: Ligands and Receptors	1.56994
	Ccl2	Other Factors Involved in the NFκB Pathway: Ligands and Receptors	1.56099
	Ccl2	Other Factors Involved in the NFκB Pathway: Inflammatory Response
JAK / STAT Signaling Pathway
	Smad5	Transcription Factors or Regulators that Interact with STAT Proteins: Other Transcription Factors and Regulators	2.26381
	Egfr	Receptors that Bind and Activate JAK Proteins	1.91094
	Egfr	Cell Growth and / or Maintenance: Cell Growth
	A2m	Genes Induced by STAT Proteins: Stat3	1.87538
	Jak2	JAK and STAT Proteins: Janus Kinase Activity	1.62802
	Jak2	STAT Protein Nuclear Translocation
	Jak2	Genes Involved in Tyrosine Phosphorylation of STAT Protein
	Jak2	Apoptosis
	Jak2	Cell Differentiation
	Jak2	Cell Growth and / or Maintenance: Cell Proliferation
	Nos2	Genes Induced by STAT Proteins: Stat1	1.62374
	Nos2	Immune Response: Inflammatory Response
	Nr3c1	Receptors that Bind and Activate JAK Proteins	1.51312
	Nr3c1	Transcription Factors or Regulators that Interact with STAT Proteins: Other Transcription Factors and Regulators
Innate and Adaptive Immune Response
	Il6	IL-1R / TLR Members and Related Genes: Cytokines	4.37786
	Il6	Septic Shock: Cytokines and Growth Factors
	Il1b	IL-1R / TLR Members and Related Genes: Inflammatory Response	2.55613
	Il1b	IL-1R / TLR Members and Related Genes: Apoptosis
	Il1b	IL-1R / TLR Members and Related Genes: Cytokines
	Il1b	Septic Shock: Apoptosis
	Il1b	Septic Shock: Cytokines and Growth Factors
	Il1b	Septic Shock: Inflammatory Response
	Il1rap	IL-1R / TLR Members and Related Genes: Interleukin-1 Receptors	2.02206
	Serpine1	Septic Shock: Other Genes Involved in Septic Shock	1.83185
	Chuk	IL-1R / TLR Members and Related Genes: Genes Involved in NFκB Signaling	1.64518
	Nos2	Host Defense to Bacteria: Inflammatory Response	1.62374
	Nos2	Host Defense to Bacteria: Defense Response to Bacteria
	Ccl2	Host Defense to Bacteria: Inflammatory Response	1.56099
	Ccl2	Host Defense to Bacteria: Cytokines, Chemokines, and their Receptors
Neurogenesis and Neural Stem Cells
	Inhba	Cell Cycle Genes: Cell Cycle Arrest	2.0124
	Inhba	Cell Cycle Genes: Negative Regulation of the Cell Cycle
	Inhba	Regulation of Cell Differentiation: Other Regulators of Cell Differentiation
	Inhba	Growth Factors and Cytokines: Growth Factors
	Inhba	Growth Factors and Cytokines: Cytokines
	Inhba	Apoptosis: Induction of Apoptosis
	Notch2	Cell Proliferation: Negative Regulation of Cell Proliferation	1.98945
	Notch2	Cell Cycle Genes: Cell Cycle Arrest
	Notch2	Regulation of Cell Differentiation: Cell Fate Determination
	Notch2	Apoptosis: Anti-Apoptosis
	Notch2	Apoptosis: Induction of Apoptosis
	Notch2	Cell Signaling Genes Involved in Neurogenesis: Notch Signaling Pathway
	Notch2	Cell Signaling Genes Involved in Neurogenesis: Other Genes Related to Signaling
	Notch2	Regulation of Transcription
	Robo1	Cell Adhesion: Homophilic Cell Adhesion	1.98803
	Cdk5rap2	Regulation of Cell Differentiation: Regulation of Neuronal Differentiation	1.88062
Hypoxia Signaling Pathway
	Il6	Response to Stress: Immune Response	4.37786
	Il6	Apoptosis: Other Apoptosis Genes
	Il6	Protein Metabolism: Protein Biosynthesis
	Il6	Protein Metabolism: Protein Binding
	Il6	Extracellular Matrix (ECM)-Related Molecules: Other Extracellular Molecules
	Il6	Cell Growth: Growth Factors
	Ptx3	Response to Stress: Other Genes Related to Stress Response	2.12247
	Ptx3	Extracellular Matrix (ECM)-Related Molecules: Other Extracellular Molecules
	Ptx3	Metabolism: Carbohydrate Metabolism
	Ptx3	Metabolism: Other Metabolism Genes
	Nos2	Response to Stress: Response to Hypoxia	1.62374
	Nos2	Response to Stress: Immune Response
	Nos2	Hemoglobin Complex Associated Genes
	Nos2	Oxidoreductase: Other Oxidoreductase Genes
	Nos2	Protein Metabolism: Protein Homodimerization
	Nos2	Metabolism: Superoxide Metabolism
	Adm	Extracellular Matrix (ECM)-Related Molecules: Other Extracellular Molecules	1.43514
EGF / PDGF Signaling
	Egfr	Epidermal Growth Factor Receptor Signaling Pathway	1.91094
	Egfr	Intracellular Signaling Molecules: ERK1 / ERK2 MAPK Signaling Pathway
	Egfr	Intracellular Signaling Molecules: MAPKKK Cascade
	Egfr	Cell Survival & Growth: Cell Cycle
	Egfr	Cell Survival & Growth: Cell Motility
	Egfr	Cell Survival & Growth: Cell Proliferation
	Egfr	Metabolism: DNA Metabolism
	Egfr	Metabolism: Protein Metabolism
	Egfr	Response to Stimulus: Response to Other Stimuli
	Egfr	Actin and Calcium Ion Homeostasis
	Bcl2	Cell Survival & Growth: Apoptosis	1.67242
	Bcl2	Cell Survival & Growth: Cell Cycle
	Bcl2	Cell Survival & Growth: Cell Proliferation
	Bcl2	Response to Stimulus: Response to Wounding
	Braf	Intracellular Signaling Molecules: Other Intracellular Signaling Molecules	1.70776
	Braf	Cell Survival & Growth: Apoptosis
	Braf	Metabolism: Lipid Metabolism
	Braf	Metabolism: Protein Metabolism
	Braf	Development
Molecular Toxicology PathwayFinder
	Il6	Cholestasis	4.37786
	Il6	Immunotoxicity
	Il1b	Cholestasis	2.55613
	Il1b	Immunotoxicity
	Hspa1a	Heat Shock Response	2.30569
	Acaca	Steatosis	2.2183
	Cpt1b	Fatty Acid Metabolism (β-Oxidation)	2.18769
	Fasl	Apoptosis	2.12016
	Itgax	Immunotoxicity	2.05928
	Cd44	Immunotoxicity	1.74894
	Ptgs2	Immunotoxicity	1.72356
	S100a8	Phospholipidosis	1.70187
	Cyp7a1	Cholestasis	1.69919
	Slco1a4	Phospholipidosis	1.47259
	Bcl2	Apoptosis	1.67242
	Hspb1	Heat Shock Response	1.64308
	Ppp1r15b	Oxidative Stress & Antioxidant Response	1.48042
	Gadd45a	Apoptosis	1.45047
	Gadd45a	DNA Damage & Repair
	Gadd45a	ER Stress & Unfolded Protein Response
Osteogenesis
	Sox9	Skeletal Development: Cartilage Condensation	2.50826
	Sox9	Cell Growth and Differentiation: Cell Differentiation
	Sox9	Transcription Factors and Regulators
	Igf1	Cell Growth and Differentiation: Growth Factors and Receptors	2.15051
	Igf1	Cell Growth and Differentiation: Cell Differentiation
	Igf1	Extracellular Matrix (ECM) Proteins: Other ECM Molecules
	Mmp8	Bone Mineral Metabolism: Calcium Ion Binding and Homeostasis	1.89641
	Mmp8	Extracellular Matrix (ECM) Proteins: ECM Proteases
	Runx2	Skeletal Development: Other Skeletal Development Genes	1.67036
	Runx2	Cell Growth and Differentiation: Cell Differentiation
	Runx2	Transcription Factors and Regulators
	Tgfbr2	Cell Growth and Differentiation: Cell Proliferation	1.66504
	Tgfbr2	Cell Growth and Differentiation: Growth Factors and Receptors
	Tgfbr2	Cell Growth and Differentiation: Cell Differentiation
	Bmp5	Skeletal Development: Other Skeletal Development Genes	1.61087
	Bmp5	Bone Mineral Metabolism: Phosphate Transport
	Bmp5	Cell Growth and Differentiation: Growth Factors and Receptors
	Bmp5	Extracellular Matrix (ECM) Proteins: Other ECM Molecules
	Col5a1	Bone Mineral Metabolism: Phosphate Transport	1.60278
	Col5a1	Extracellular Matrix (ECM) Proteins: Collagens
	Col5a1	Cell Adhesion Molecules: Other Cell Adhesion Molecules
Multiple Sclerosis
	Il6	T Cell Activation/Signaling	4.37786
	Il6	Cytokine/Chemokine
	Il6	Inflammation: Regulation
	Il6	Inflammation: Genera
	Il1b	Adaptive Immunity	2.55613
	Il1b	Inflammation: Response
	Il1b	Inflammation: Genera
	Il1b	Cell Adhesion
	Il1b	Cellular Stress
	Fasl	Cytokine/Chemokine	2.12016
	Ccl7	Cytokine/Chemokine	1.89009
	Cd44	Inflammation: Response	1.74894
	Cd44	Inflammation: Genera
	Cd44	Cell Adhesion
	Cd44	Receptors
	Bcl2	Inflammation: Apoptosis: Neuronal	1.67242
	Bcl2	Cell Adhesion
	Bcl2	Cellular Stress
	Jak2	Inflammation: Regulation	1.62802
	Jak2	Inflammation: Apoptosis: Neuronal
	Jak2	Cell Adhesion
	Jak2	Cellular Stress
	Ednra	Inflammation: Regulation	1.5358
	Ednra	Receptors
	Adm	Inflammation: Genera	1.43514
	Adm	Cellular Stress
TGFβ / BMP Signaling Pathway
	Il6	TGFβ Superfamily Cytokines: GDF	4.37786
	Il6	Smad Target Genes: TGF-β / Activin Responsive
	Il6	Adhesion and Extracellular Molecules: Other Extracellular Molecules
	Il6	Genes Involving in Cellular and Developmental Processes: Apoptosis
	Smad5	SMAD	2.26381
	Smad5	Transcription Factors and Regulators
	Igf1	TGFβ Superfamily Cytokines: GDF	2.15051
	Igf1	Smad Target Genes: TGF-β / Activin Responsive
	Igf1	Adhesion and Extracellular Molecules: Other Extracellular Molecules
	Igf1	Genes Involving in Cellular and Developmental Processes: Apoptosis
	Igf1	Genes Involving in Cellular and Developmental Processes: Neurogenesis
	Inhba	TGFβ Superfamily Cytokines: Activin	2.0124
	Inhba	Adhesion and Extracellular Molecules: Other Extracellular Molecules
	Serpine1	Smad Target Genes: TGF-β / Activin Responsive	1.83185
	Serpine1	Adhesion and Extracellular Molecules: Other Extracellular Molecules
	Cdc25a	TGFβ Superfamily Cytokines: GDF	1.71874
	Cdc25a	Smad Target Genes: TGF-β / Activin Responsive
	Tgfbr2	Receptors	1.66504
	Bmp5	TGFβ Superfamily Cytokines: BMP	1.61087
	Bmp5	Adhesion and Extracellular Molecules: Other Extracellular Molecules
	Bmp5	Genes Involving in Cellular and Developmental Processes: Embryonic Development
	Bmp5	Genes Involving in Cellular and Developmental Processes: Skeletal Development
	Inha	TGFβ Superfamily Cytokines: Activin	1.54984
	Inha	Adhesion and Extracellular Molecules: Other Extracellular Molecules
	Inha	Genes Involving in Cellular and Developmental Processes: Apoptosis
	Inha	Genes Involving in Cellular and Developmental Processes: Neurogenesis
	Inha	Genes Involving in Cellular and Developmental Processes: Reproduction
Endothelial Cell Biology
	Il6	Endothelial Cell Activation Extracellular Matrix (ECM) Molecules	4.37786
	Il6	Endothelial Cell Activation Cytokine Activity
	Il6	Endothelial Cell Activation Other Genes Involved in Cell Growth
	Il6	Endothelial Cell Injury Response to Stress
	Il6	Endothelial Cell Injury Other Apoptosis Genes
	Il1b	Endothelial Cell Activation Extracellular Matrix (ECM) Molecules	2.55613
	Il1b	Endothelial Cell Activation Cytokine Activity
	Il1b	Endothelial Cell Activation Other Genes Involved in Cell Growth
	Il1b	Endothelial Cell Injury Response to Stress
	Serpine1	Angiogenesis Other Genes Involved in Angiogenesis	1.83185
	Serpine1	Endothelial Cell Activation Extracellular Matrix (ECM) Molecules
	Serpine1	Endothelial Cell Activation Thrombin Activity
	Thbs1	Angiogenesis Negative Regulation of Angiogenesis	1.82848
	Thbs1	Endothelial Cell Activation Adhesion Molecules
	Thbs1	Endothelial Cell Activation Extracellular Matrix (ECM) Molecules
	Bcl2	Endothelial Cell Injury Anti-Apoptosis	1.67242
	Nos2	Permissibility and Vessel Tone NO System	1.62374
	Nos2	Permissibility and Vessel Tone Oxidoreductase Activity
	Nos2	Endothelial Cell Activation Other Genes Involved in Cell Growth
	Nos2	Endothelial Cell Injury Response to Stress
	Il11	Endothelial Cell Activation Extracellular Matrix (ECM) Molecules	1.57186
	Il11	Endothelial Cell Activation Cytokine Activity
	Il11	Endothelial Cell Activation Other Genes Involved in Cell Growth
	Ccl2	Endothelial Cell Activation Extracellular Matrix (ECM) Molecules	1.56099
	Ccl2	Endothelial Cell Activation Cytokine Activity
	Ccl2	Endothelial Cell Injury Response to Stress
	Ednra	Permissibility and Vessel Tone Endothelin System	1.5358
	Ednra	Permissibility and Vessel Tone Regulation of Blood Pressure
	Ednra	Endothelial Cell Activation Other Genes Involved in Cell Growth
Hematopoietic Stem Cells and Hematopoiesis
	Il25	Cytokines and Growth Factors: Cytokines	2.29138
	Inhba	Cytokines and Growth Factors: Cytokines	2.0124
	Inhba	Cytokines and Growth Factors: Growth Factors
	Inhba	Cell Cycle Regulators: Cell Cycle Arrest
	Inhba	Cell Differentiation: B-Cell Differentiation
	Inhba	Cell Differentiation: Differentiation Regulators for Other Blood Cell Types
	Inhba	Signaling Molecules: Cell Surface Receptors Linked to Signal Transduction
	Notch2	Cell Surface / Cell Lineage Markers	1.98945
	Notch2	Cell Cycle Regulators: Cell Cycle Arrest
	Notch2	Cell Differentiation: Differentiation Regulators for Other Blood Cell Types
	Notch2	Hematopoiesis Regulators
	Notch2	Signaling Molecules: Notch Signaling Pathway
	Notch2	Transcription Factors and Regulators
	Tnfrsf7	Cell Surface / Cell Lineage Markers	1.98635
	Tnfrsf7	Cell Differentiation: B-Cell Differentiation
	Tnfrsf7	Cell Differentiation: T-Cell Differentiation
	Tnfrsf7	Signaling Molecules: Cell Surface Receptors Linked to Signal Transduction
	Cd44	Cell Surface / Cell Lineage Markers	1.74894
	Nos2	Cell Differentiation: T-Cell Differentiation	1.62374
	Il11	Cytokines and Growth Factors: Cytokines	1.57186
	Il11	Cytokines and Growth Factors: Growth Factors
	Il11	Blood Cell Activation: Genes Activating Other Blood Cell Types
	Il11	Cell Differentiation: B-Cell Differentiation
	Il11	Cell Differentiation: Differentiation Regulators for Other Blood Cell Types
	Inha	Cytokines and Growth Factors: Cytokines	1.54984
	Inha	Cytokines and Growth Factors: Growth Factors
	Inha	Cell Cycle Regulators: Cell Cycle Arrest
	Inha	Cell Differentiation: B-Cell Differentiation
	Inha	Cell Differentiation: Differentiation Regulators for Other Blood Cell Types
	Inha	Signaling Molecules: Cell Surface Receptors Linked to Signal Transduction
Inflammatory Response and Autoimmunity
	Il6	Cytokines Other Cytokines	4.37786
	Il6	Acute-Phase Response
	Il6	Humoral Immune Response
	Il22	Cytokines Other Cytokines	2.96362
	Il22	Acute-Phase Response
	Il22	Inflammatory Response
	Ccr2	Cytokine Receptors Chemokine Receptors	2.56147
	Ccr2	Inflammatory Response
	Ccr2	Humoral Immune Response
	Il1b	Cytokines Other Cytokines	2.55613
	Il1b	Inflammatory Response
	Il1b	Humoral Immune Response
	Ccl3	Cytokines Chemokines	2.47255
	Ccl3	Inflammatory Response
	Ccl3	Humoral Immune Response
	Il8rb	Cytokine Receptors Cytokine Receptors	2.24008
	Il8rb	Cytokine Receptors Chemokine Receptors
	Il8rb	Inflammatory Response
	Fasl	Cytokines Other Cytokines	2.12016
	Ccl4	Cytokines Chemokines	2.04536
	Ccl4	Inflammatory Response
	Il1rap	Cytokine Receptors Cytokine Receptors	2.02206
	Il1rap	Inflammatory Response
	Ccl7	Cytokines Chemokines	1.89009
	Ccl7	Inflammatory Response
	Ccl7	Humoral Immune Response
	Tnfsf14	Cytokines Other Cytokines	1.88228
	Cxcl10	Cytokines Other Cytokines	1.84805
	Cxcl10	Inflammatory Response
	Nos2	Inflammatory Response	1.62374
	Ccl2	Cytokines Chemokines	1.56099
	Ccl2	Inflammatory Response
	Ccl2	Humoral Immune Response
	Nr3c1	Inflammatory Response	1.51312
