# Supplementary material for: Transcriptomics and proteomics analyses of the PACAP38 influenced ischemic brain in permanent middle cerebral artery occlusion model mice
Source: J Neuroinflammation. 2012 Nov 23;9:256. doi: 10.1186/1742-2094-9-256 (PMC3526409; doi:10.1186/1742-2094-9-256)
Supplement: Additional file 16 — Table S10. The functionally categorized (pathwayor specific disease states-focused gene classifications) downregulated genes at 24 h. [file 1742-2094-9-256-S16.xlsx]

## Sheet: Suppl Table 10
Supplementary Table 10
Polycomb & Trithorax Complexes
	Snai1	Polycomb Cofactors: Complex Assembly	0.610365
Ubiquitination (Ubiquitylation) Pathway
	Ube2b	Ubiquitin-Conjugating Enzymes (E2): Other Ubiquitin-Conjugating Enzymes (E2)	0.319224
Fatty Acid Metabolism
	Hmgcs1	Ketogenesis	0.614535
	Fabp4	Fatty Acid Transport	0.474056
Cell Cycle
	Mki67	S Phase and DNA Replication	0.589524
	Pmp22	Cell Cycle Checkpoint and Cell Cycle Arrest	0.597369
Drug Metabolism: Phase II
	Ptges	Glutathione Transferases	0.386341
	Sat1	N-Acetyltransferases	0.67709
Homeobox (HOX) Genes
	Pax3	Organ Morphogenesis	0.528003
	Pax3	Brain & Nervous System Development: Nervous System Development
Mitochondria
	Ucp1	Membrane Polarization & Potential	0.508581
	Ucp1	Mitochondrial Transport
Epigenetic Chromatin Modification Enzymes
	Ube2b	Histone Ubiquitination	0.319224
	Setd7	SET Domain Proteins (Histone Methyltransfesase Activity)	0.613252
	Jmjd3	DNA / Histone Demethylases	0.596389
Drug Metabolism
	Mt2	Drug Transporters: Metallothioneins	0.503894
	Hsd17b2	Phase II Metabolizing Enzymes: Dehydrogenases	0.554053
	Alox12	Phase II Metabolizing Enzymes: Lipoxygenases	0.41935
Heat Shock Proteins
	Hspa1a	HSP70 Family Members	0.447653
	Hspb7	Small HSPs	0.534535
	Hspb1	Small HSPs	0.573473
Neurotransmitter Receptors and Regulators
	Drd4	Neurotransmitter Receptors: Dopamine Receptors	0.348158
	Chrng	Neurotransmitter Receptors: Other Neurotransmitter Receptors	0.651212
	Chrna2	Neurotransmitter Receptors: Other Neurotransmitter Receptors	0.517043
Epigenetic Chromatin Remodeling Factors
	Mbd1	Methyl-CpG DNA Binding Domain (MDB) Proteins	0.539241
	Baz1a	Bromodomain Proteins	0.565175
	Chd6	Chromodomain / Helicase / DNA-Binding Domain (CHD) Proteins	0.627586
	Chd7	Chromodomain / Helicase / DNA-Binding Domain (CHD) Proteins	0.639894
Stem Cell Signaling
	Ltbp2	TGFβ Superfamily Signaling Pathway: Receptors & Coreceptors	0.439215
	Smad9	TGFβ Superfamily Signaling Pathway: Transcription Factors & Cofactors	0.567849
	Fgfr2	Fibroblast Growth Factor (FGF) Signaling Pathway: Receptors	0.474269
	Sufu	Hedgehog Signaling Pathway: Transcription Factors & Cofactors	0.536231
Stress Response to Cellular Damage
	Hmox1	Molecular Chaperones: Heat Shock Proteins	0.424526
	Hspa1a	Molecular Chaperones: Heat Shock Proteins	0.447653
	Cyp1b1	Xenobiotic Metabolism: Cytochrome P450s	0.493164
	Hspb1	Molecular Chaperones: Heat Shock Proteins	0.573473
Amino Acid Metabolism I
	Hmgcs1	Leucine Metabolism	0.614535
	Cyp1b1	Tryptophan Metabolism	0.493164
	Auh	Leucine Metabolism	0.574451
	Sat1	Arginine Metabolism	0.67709
	Odc1	Proline Metabolism	0.549298
Amino Acid Metabolism II
	Hdc	Histidine Metabolism	0.368077
	Tyrp1	Isoleucine Metabolism	0.422323
	Tyrp1	Tyrosine Metabolism
	Th	Isoleucine Metabolism	0.572375
	Th	Tyrosine Metabolism
Drug Transporters
	Aqp1	Aquaporins	0.614524
	Slc16a3	SLC Transporters Involved in Drug Transport	0.35433
	Mvp	Major Vault Protein	0.551342
	Slc7a11	SLC Transporters Involved in Drug Transport	0.476951
	Slc28a2	SLC Transporters Involved in Drug Transport	0.432506
Protein Phosphatases
	Ssh1	Others	0.565383
	Dusp1	Dual Specificity Phosphatases	0.595388
	Dusp16	Dual Specificity Phosphatases	0.473545
	Ptprc	Protein Tyrosine Phosphatases: Receptor Type	0.642186
	Ptpla	Protein Tyrosine Phosphatases: Others	0.572443
Cell Lineage Identification
	Aqp1	Terminal Differentiation: Endoderm: Proximal Tubule Cell	0.614524
	Krt19	Progenitors: Endoderm: Pancreatic Islet Cell	0.322972
	Foxd3	Germ Layers: Ectoderm	0.462162
	Nppa	Terminal Differentiation: Mesoderm: Cardiomyocyte	0.483233
	Dcn	Germ Layers: Mesoderm	0.551121
	Sox7	Germ Layers: Endoderm	0.45595
Nuclear Receptors and Coregulators
	Nr4a1	Steroid Hormone Receptors	0.521514
	Nr4a1	Other Transcription Factors & Regulators
	Nfkb2	Positive Regulators of Transcription	0.586012
	Vdr	Vitamin D Receptors & Related Molecules	0.525751
	Vdr	Steroid Hormone Receptors
	Vdr	Other Transcription Factors & Regulators
Oxidative Stress and Antioxidant Defense
	Il19	Genes Involved in Reactive Oxygen Species (ROS) Metabolism Other Genes Involved in ROS Metabolism	0.378542
	Ptgs2	Antioxidants Glutathione Other Peroxidases	0.57346
	Vim	Genes Involved in Reactive Oxygen Species (ROS) Metabolism Oxygen Tansporters	0.669082
	Duox1	Antioxidants Glutathione Other Peroxidases	0.583549
	Duox1	Genes Involved in Reactive Oxygen Species (ROS) Metabolism Oxidative Stress Responsive Genes
	Fmo2	Genes Involved in Reactive Oxygen Species (ROS) Metabolism Other Genes Involved in ROS Metabolism	0.621113
	Ppp1r15b	Genes Involved in Reactive Oxygen Species (ROS) Metabolism Oxidative Stress Responsive Genes	0.64439
Telomeres & Telomerase
	Igf1	Telomere Regulation: Telomerase Regulation	0.678864
	Smg6	Telomere Maintenance	0.410542
	Myc	Telomere Maintenance	0.649207
	Myc	Telomere Regulation: Telomerase Regulation
	Tgfb1	Telomere Regulation: Telomerase Regulation	0.630078
	Tnks2	Telomere Maintenance	0.593415
	Rassf1	Telomere Regulation: Shelterin Complex Regulation	0.651493
Glycosylation
	B3gnt8	N-Acetylglucosaminyltransferases	0.606405
	B3gnt8	N-Linked Glycosylation
	B3gnt8	O-Linked Glycosylation
	St3gal1	Sialyltransferases	0.348111
	St3gal1	O-Linked Glycosylation
	St3gal1	Glycosphingolipids
	Edem1	Mannosidases	0.616019
	Edem1	N-Linked Glycosylation
Primary Cilia
	Igf1	Cellular Signaling mTOR	0.678864
	Igf1	Cell Cycle
	Fos	Cellular Signaling bRaf/MEK/ERK	0.247145
	Lrp2	Cellular Signaling Hedgehog	0.573387
	Wwtr1	Cilium Morphogenesis	0.6339
	Sufu	Cellular Signaling Hedgehog	0.536231
	Ihh	Cellular Signaling Hedgehog	0.555515
	Mos	Cellular Signaling bRaf/MEK/ERK	0.526519
Unfolded Protein Response
	Htra4	ER Associated Degradation (ERAD)	0.460449
	Cebpb	Transcription Factors	0.498544
	Cebpb	Apoptosis
	Edem1	ER Protein Folding Quality Control	0.616019
	Edem1	ER Associated Degradation (ERAD)
	Insig1	Regulation of Cholesterol Metabolism	0.503775
	Ppp1r15b	Regulation of Translation	0.64439
	Ppp1r15b	Apoptosis
mTOR Signaling
	Igf1	mTOR Upstream Regulators mTORC1 Positive Regulators	0.678864
	Igf1	Cellular Processes Growth Factor Response
	Igfbp3	mTOR Upstream mTORC1 Negative Regulators	0.428157
	Igfbp3	Cellular Processes Growth Factor Response
	Rps6kb1	mTOR Downstream Effectors mTORC1 Positive Regulation	0.634918
	Rps6kb1	mTOR Downstream mTORC2 Positive Regulation
	Rps6kb1	Cellular Processes Translation
	Vegfa	mTOR Downstream Effectors mTORC1 Positive Regulation	0.441206
	Vegfa	Cellular Processes Angiogenesis
Stress & Toxicity
	Il6	Inflammation	0.205108
	Cyp2a5	Oxidative or Metabolic Stress	0.479496
	Il1b	Inflammation	0.237748
	Hmox1	Oxidative or Metabolic Stress	0.424526
	Mt2	Oxidative or Metabolic Stress	0.503894
	Il1a	Inflammation	0.294544
	Cyp1b1	Oxidative or Metabolic Stress	0.493164
	Nfkb1	Inflammation	0.667826
	Egr1	Proliferation and Carcinogenesis	0.588736
Neuroscience Ion Channels & Transporters
	Clca1	Chloride Channel	0.616498
	Kcnd1	Potassium Channel: Voltage-gated Potassium Channels	0.64258
	Slc6a12	Transporters for Other Molecules: Amine Transporters	0.48434
	Slc6a12	Transporters for Other Molecules: Neurotransmitter Transporters
	Clic1	Chloride Channel	0.512031
	Kcnq1	Potassium Channel: Voltage-gated Potassium Channels	0.375604
	Kcnj8	Potassium Channel: Inward rectifier Potassium Channels	0.701155
	Slc6a3	Transporters for Other Molecules: Amine Transporters	0.604963
	Slc6a3	Transporters for Other Molecules: Neurotransmitter Transporters
Stress & Toxicity PathwayFinder
	Il6	Inflammation	0.205108
	Cyp2a5	Oxidative or Metabolic Stress	0.479496
	Il1b	Inflammation	0.237748
	Hmox1	Oxidative or Metabolic Stress	0.424526
	Mt2	Oxidative or Metabolic Stress	0.503894
	Il1a	Inflammation	0.294544
	Cyp1b1	Oxidative or Metabolic Stress	0.493164
	Nfkb1	Inflammation	0.667826
	Egr1	Proliferation and Carcinogenesis	0.588736
Interferon α, β Response
	Ifnb1	Ligands and Receptors	0.31296
	Samsn1	Genes Associated with Intrinsic Interferon Resistance: Signal Transduction	0.498423
	Gch1	Genes Associated with HCV-Induced Interferon Resistance	0.579117
	Vegfa	Genes Associated with Intrinsic Interferon Resistance: Cell Growth	0.441206
	Isg20	Genes Associated with HCV-Induced Interferon Resistance	0.663382
	H2-Q1	Genes Associated with Intrinsic Interferon Resistance: Others	0.659088
	H2-K1	Genes Associated with Intrinsic Interferon Resistance: Others	0.641697
	Irf1	Interferon Responsive Genes with IFN-Responsive Elements	0.619102
	Cav1	Genes Associated with Intrinsic Interferon Resistance: Signal Transduction	0.701796
Drug Metabolism: Phase I Enzymes
	Cyp2a5	Cytochrome P450s	0.479496
	Smg6	Telomere Maintenance	0.410542
	Cyp1b1	Cytochrome P450s	0.493164
	Cyp2a4	Cytochrome P450s	0.458401
	Aldh1a2	Aldehyde Dehydrogenases	0.49252
	Myc	Telomere Maintenance	0.649207
	Tnks2	Telomere Maintenance	0.593415
	Fmo2	Flavin Containing Monooxygenases	0.621113
	Aldh1a3	Aldehyde Dehydrogenases	0.579222
Embryonic Stem Cells
	Foxa2	Selected Embryonic Stem Cell Differentiation / Lineage Markers: Extra-Embryonic Endoderm Markers	0.59661
	Foxd3	Embryonic Stem Cell-Specific Genes: Transcription Factors Maintaining "Stem-ness"	0.462162
	Cdh5	Selected Embryonic Stem Cell Differentiation / Lineage Markers: Endothelial	0.386668
	Eomes	Selected Embryonic Stem Cell Differentiation / Lineage Markers: Trophoblast Markers	0.160087
	Ifitm1	Embryonic Stem Cell-Specific Genes: Signaling Molecules Required for Pluripotency and Self-Renewal	0.678525
	Nes	Selected Embryonic Stem Cell Differentiation / Lineage Markers: Neural	0.429052
	Crabp2	Embryonic Stem Cell-Specific Genes: Signaling Molecules Required for Pluripotency and Self-Renewal	0.37067
	Cd9	Embryonic Stem Cell-Specific Genes: Other Embryonic Stem Cell-Specific Genes	0.641926
	Flt1	Selected Embryonic Stem Cell Differentiation / Lineage Markers: Endothelial	0.66531
Nitric Oxide Signaling Pathway
	Fos	Genes Induced by Nitric Oxide: Cell Cycle Genes	0.247145
	Fos	Genes Induced by Nitric Oxide: Transcription Regulators
	Ptx3	Genes Involved in Nitric Oxide (NO) Biosynthesis: Positive Regulators of NO Biosynthesis	0.479157
	Myc	Genes Induced by Nitric Oxide: Apoptosis Genes	0.649207
	Myc	Genes Induced by Nitric Oxide: Cell Cycle Genes
	Myc	Genes Induced by Nitric Oxide: Transcription Regulators
	Cav1	Genes Involved in Nitric Oxide (NO) Biosynthesis: Negative Regulators of NO Biosynthesis	0.701796
	Egr1	Genes Induced by Nitric Oxide: Transcription Regulators	0.588736
	Ppp1r15b	Genes Involved in Response to Oxidative Stress: Other Genes Involved in Oxidative Stress	0.64439
PI3K-AKT Signaling
	Cd14	Inactivation of Gsk3 and the Accumulation of β-Catenin	0.210705
	Igf1	IGF-1 Signaling Pathway	0.678864
	Fos	IGF-1 Signaling Pathway	0.247145
	Rps6kb1	Genes Involved in the mTOR Signaling Pathway	0.634918
	Rps6kb1	Regulation of eIF4e and p70 S6 Kinase
	Pabpc1	Regulation of eIF4e and p70 S6 Kinase	0.390576
	Nfkb1	Inactivation of Gsk3 and the Accumulation of β-Catenin	0.667826
	Hspb1	AKT and PI3K Family Members and Their Regulators	0.573473
	Raf1	IGF-1 Signaling Pathway	0.533653
Stem Cell Transcription Factors
	Hoxb5	Axis / Symmetry / Segmentation	0.583414
	Hoxb5	Embryonic Development
	Foxa2	Axis / Symmetry / Segmentation	0.59661
	Foxa2	Embryonic Development
	Foxa2	Ectoderm, Endoderm & Mesoderm Formation & Differentiation
	Foxa2	Neurogenesis
	Myc	Organ Morphogenesis	0.649207
	Vdr	Placenta Development	0.525751
	Vdr	Organ Morphogenesis
VEGF Signaling
	Sphk1	Others	0.417217
	Ptgs2	Others	0.57346
	Rac2	Small G-Protein Signaling	0.527326
	Vegfa	Vascular Endothelial & Other Growth Factors & Receptors	0.441206
	Pgf	Vascular Endothelial & Other Growth Factors & Receptors	0.633246
	Cav1	Others	0.701796
	Hspb1	Heat Shock Proteins	0.573473
	Flt1	Vascular Endothelial & Other Growth Factors & Receptors	0.66531
	Raf1	Small G-Protein Signaling	0.533653
Alzheimer’s Disease
	Il1a	Apoptosis: Anti-Apoptosis	0.294544
	Il1a	Cell Cycle Regulators: Other Cell Cycle Genes
	Il1a	Cell Signaling Molecules: Other Signaling Molecules
	A2m	Beta-Amyloid Generation, Oligomerization, Clearance, and Degradation: Other Genes Involved in Beta-Amyloid Metabolism	0.6909
	Casp4	Apoptosis: Induction of Apoptosis	0.490643
	Plat	Beta-Amyloid Generation, Oligomerization, Clearance, and Degradation: Other Peptidases Involved in Beta-Amyloid Degradation	0.641815
	App	Beta-Amyloid Generation, Oligomerization, Clearance, and Degradation: Beta-Amyloid Clearance Through Endocytosis	0.631126
	App	Apoptosis: Other Genes Involved in Apoptosis and Cell Death
	App	Other Genes Involved in Alzheimer's disease: Protease Inhibitors
	Gng4	Cell Signaling Molecules: G-Protein Coupled Receptor Signaling	0.676461
Autophagy
	Tnf	Regulation of Autophagy: Co-Regulators of Autophagy and Apoptosis	0.269004
	Igf1	Regulation of Autophagy: Co-Regulators of Autophagy and Apoptosis	0.678864
	Rps6kb1	Regulation of Autophagy: Autophagy in Response to Other Intracellular Signals	0.634918
	Tgm2	Regulation of Autophagy: Co-Regulators of Autophagy and Apoptosis	0.660747
	Tgfb1	Regulation of Autophagy: Co-Regulators of Autophagy and Apoptosis	0.630078
	Tgfb1	Regulation of Autophagy: Co-Regulators of Autophagy and the Cell Cycle
	Nfkb1	Regulation of Autophagy: Co-Regulators of Autophagy and Apoptosis	0.667826
	Casp8	Regulation of Autophagy: Co-Regulators of Autophagy and Apoptosis	0.652087
	App	Regulation of Autophagy: Co-Regulators of Autophagy and Apoptosis	0.631126
	Cxcr4	Regulation of Autophagy: Co-Regulators of Autophagy and Apoptosis	0.494587
Common Cytokines
	Il1rn	Interleukins	0.327915
	Il19	Interleukins	0.378542
	Tnf	TNF Superfamily	0.269004
	Il1b	Interleukins	0.237748
	Il1a	Interleukins	0.294544
	Gdf15	Bone Morphogenic Proteins (BMPs) and TGF-β Family	0.543781
	Il1f9	Interleukins	0.327453
	Bmp7	Bone Morphogenic Proteins (BMPs) and TGF-β Family	0.514241
	Tnfsf14	TNF Superfamily	0.374633
	Il11	Interleukins	0.185079
Cell Death PathwayFinder
	Tnf	Apoptosis and Autophagy	0.269004
	Igf1	Autophagy	0.678864
	Tnfrsf10b	Apoptosis: Pro-Apoptotic	0.438278
	Birc3	Apoptosis: Anti-Apoptotic	0.452345
	Tnfrsf1a	Apoptosis and Necrosis	0.612839
	Mcl1	Apoptosis: Anti-Apoptotic	0.570873
	Rps6kb1	Autophagy	0.634918
	Pvr	Necrosis	0.564729
	Nfkb1	Autophagy	0.667826
	App	Autophagy	0.631126
MAP Kinase Signaling Pathway
	Dlk1	MKKK	0.704442
	Fos	Genes with Induced Expression	0.247145
	Myc	Activated Transcription Factors	0.649207
	Myc	Genes with Induced Expression
	Egfr	Activated Transcription Factors	0.668606
	Ets1	Activated Transcription Factors	0.531623
	Hspb1	Genes with Induced Expression	0.573473
	Mos	MKKK	0.526519
	Raf1	MKKK	0.533653
	Egr1	Genes with Induced Expression	0.588736
Polycomb & Trithorax Target Genes
	Lox	Cellular Mechanisms: Extracellular Matrix Organization	0.31344
	Cyp1b1	Cellular Mechanisms: Other	0.493164
	Pmp22	Cellular Mechanisms: Differentiation	0.597369
	Cxcl16	Cellular Mechanisms: Signal Transduction	0.576623
	Thbd	Cellular Mechanisms: Other	0.37949
	Trim10	Cellular Mechanisms: Differentiation	0.351336
	Ucp1	Cellular Mechanisms: Differentiation	0.508581
	Rassf1	Cellular Mechanisms: Signal Transduction	0.651493
	Rassf1	Cellular Mechanisms: Cell Cycle
	Atf3	Cellular Functions: Transcription Factors	0.461649
Lipoprotein Signaling
	Hmgcs1	Cholesterol Biosynthesis	0.614535
	Dhcr24	Cholesterol Biosynthesis	0.626812
	Cxcl16	LDL Receptors	0.576623
	Osbpl1a	Other Genes Involved in Cholesterol Metabolism	0.67813
	Insig1	Other Genes Involved in Cholesterol Metabolism	0.503775
	Ldlr	LDL Receptors	0.523675
	Ldlr	Other Genes Involved in Cholesterol Transport
	Ldlr	Cholesterol Absorption
	Ldlr	Cholesterol Homeostasis
	Fdps	Cholesterol Biosynthesis	0.617296
	Idi1	Cholesterol Biosynthesis	0.598676
Obesity
	Il6	Anorectic Genes Neuropeptides and Receptors	0.205108
	Tnf	Anorectic Genes Adipocyte-derived Peptides and Receptors	0.269004
	Il1b	Anorectic Genes Neuropeptides and Receptors	0.237748
	Calca	Anorectic Genes Neuropeptides and Receptors	0.640371
	Il1a	Anorectic Genes Neuropeptides and Receptors	0.294544
	Gh	Anorectic Genes Neuropeptides and Receptors	0.237999
	Lepr	Anorectic Genes Adipocyte-derived Peptides and Receptors	0.632485
	C3	Genes Related to Energy Expenditure Adipocyte-derived Peptides and Receptors	0.668922
	Ucp1	Genes Related to Energy Expenditure Adipocyte-derived Peptides and Receptors	0.508581
	Ucn	Anorectic Genes Neuropeptides and Receptors	0.602936
	Oprm1	Orexigenic Genes Neuropeptides and Receptors	0.616858
Parkinson's Disease
	Dlk1	Others	0.704442
	Th	Mitochondria	0.572375
	Th	Synaptic Vesicles
	Th	Signal Transduction: Dopaminergic
	Casp8	Apoptosis: Pro-Apoptosis	0.652087
	App	Cell Adhesion	0.631126
	App	Apoptosis: Pro-Apoptosis
	App	Signal Transduction: Notch
	Slc18a2	Transporters	0.620116
	Slc6a3	Signal Transduction: Dopaminergic	0.604963
	Slc6a3	Transporters
Stem Cell
	Igf1	Stem Cell Specific Markers: Cytokines and Growth Factors	0.678864
	Cd8b1	Stem Cell Differentiation Markers: Hematopoietic Cell Lineage Markers	0.547098
	Fgf2	Stem Cell Specific Markers: Cell Cycle Regulators	0.405045
	Fgf2	Stem Cell Specific Markers: Cytokines and Growth Factors
	Cd44	Stem Cell Specific Markers: Cell Adhesion Molecules	0.530279
	Cd44	Stem Cell Differentiation Markers: Neural Cell Lineage Markers
	Foxa2	Stem Cell Differentiation Markers: Embryonic Cell Lineage Markers	0.59661
	Myc	Stem Cell Specific Markers: Cell Cycle Regulators	0.649207
	Myc	Signaling Pathways Important for Stem Cell Maintenance: Wnt Pathway
	Col2a1	Stem Cell Differentiation Markers: Mesenchymal Cell Lineage Markers	0.687216
	Wnt1	Signaling Pathways Important for Stem Cell Maintenance: Wnt Pathway	0.5871
Terminal Differentiation Markers
	Aqp1	Kidney (Nephron): Proximal Tubule Cell	0.614524
	Krt19	Liver: Cholangiocyte	0.322972
	Fabp4	Adipocyte	0.474056
	Dll4	Endothelium: Arterial	0.547329
	Cdh5	Endothelium: General	0.386668
	Col2a1	Bone: Osteoblast	0.687216
	Nppa	Muscle: Cardiomyocyte	0.483233
	Tyrp1	Epithelium: Melanocyte	0.422323
	Th	Nervous System: Dopaminergic Neuron	0.572375
	Cxcr4	Bone Marrow: Macrophage	0.494587
	Itgam	Bone Marrow: Monocyte	0.627779
Interferon (IFN) and Receptor
	Il6	Interferons: Other Genes Related to Interferons	0.205108
	Csf3	Interferons: Other Genes Related to Interferons	0.127872
	Osm	Interferons: Other Genes Related to Interferons	0.297589
	Csf2rb1	Interferon Receptors: Other Hematopoietin and Interferon-class (D200-domain) Cytokine Receptors	0.506646
	Ifnb1	Interferons: Ligands for Hematopoietin and Interferon-class (D200-domain) Cytokine Receptors	0.31296
	Il4ra	Interferon Receptors: Other Hematopoietin and Interferon-class (D200-domain) Cytokine Receptors	0.506977
	Il13ra1	Interferon Receptors: Other Hematopoietin and Interferon-class (D200-domain) Cytokine Receptors	0.477971
	Lepr	Interferon Receptors: Other Hematopoietin and Interferon-class (D200-domain) Cytokine Receptors	0.632485
	Il28ra	Interferon Receptors: Other Hematopoietin and Interferon-class (D200-domain) Cytokine Receptors	0.508255
	Ifitm1	Interferon-Inducible Proteins: Other Interferon-Inducible Genes	0.678525
	Irf1	Interferon Regulatory Factors: Transcriptional Regulators	0.619102
Notch Signaling Pathway
	Cd44	Notch Signaling Pathway Target Genes: Others with Unspecified Functions	0.530279
	Wisp1	Other Genes Involved in the Notch Signaling Pathway: Cell Growth and Migration	0.614738
	Wisp1	Genes from Signaling Pathways that Crosstalk with Notch Signaling: Wnt Receptor Signaling Pathway
	Runx1	Other Genes Involved in the Notch Signaling Pathway: Genes Regulating Cell Differentiation	0.507132
	Runx1	Other Genes Involved in the Notch Signaling Pathway: Regulation of Transcription
	Fos	Notch Signaling Pathway Target Genes: Neurogenesis	0.247145
	Fos	Notch Signaling Pathway Target Genes: Regulation of Transcription
	Nfkb2	Notch Signaling Pathway Target Genes: Regulation of Transcription	0.586012
	Sufu	Genes from Signaling Pathways that Crosstalk with Notch Signaling: Sonic Hedgehog (Shh) Pathway	0.536231
	Nfkb1	Notch Signaling Pathway Target Genes: Apoptosis Genes	0.667826
	Nfkb1	Notch Signaling Pathway Target Genes: Regulation of Transcription
Adipogenesis
	Dlk1	Adipogenesis Regulation Adipogenesis Regulation	0.704442
	Cebpd	Adipogenesis Regulation Pro-Adipogenesis	0.461889
	Angpt2	Hormones	0.363347
	Fabp4	PPAR Gamma Targets	0.474056
	Fabp4	Adipogenesis Regulation Pro-Adipogenesis
	Fgf2	Adipogenesis Regulation Pro-Adipogenesis	0.405045
	Cebpb	Adipogenesis Regulation Pro-Adipogenesis	0.498544
	Bmp7	Adipogenesis Regulation Pro-Brown Adipose Tissue	0.514241
	Wnt1	Adipogenesis Regulation Adipogenesis Regulation	0.5871
	Ucp1	Adipogenesis Regulation Pro-Brown Adipose Tissue	0.508581
	Egr2	Adipogenesis Regulation Pro-White Adipose Tissue	0.361329
	Vdr	Adipogenesis Regulation Adipogenesis Regulation	0.525751
Estrogen Receptor Signaling
	Il6	Genes Associated with Breast Cancer Prognosis	0.205108
	Thbs1	Genes Directly Associated with Breast Cancer	0.187027
	Krt19	Genes Directly Associated with Breast Cancer	0.322972
	Krt19	Genes Associated with Breast Cancer Prognosis
	Cd44	Genes Associated with the Response to Chemotherapy	0.530279
	Tgfa	Genes Associated with Breast Cancer Prognosis	0.416868
	Rac2	Genes Directly Associated with Breast Cancer	0.527326
	Egfr	Genes Associated with Breast Cancer Prognosis	0.668606
	Vegfa	Genes Associated with Breast Cancer Prognosis	0.441206
	Pappa	Genes Associated with the Response to Chemotherapy	0.66295
	Hspb1	Genes Associated with the Estrogen Receptor Signaling Pathway	0.573473
	Krt18	Genes Associated with the Estrogen Receptor Signaling Pathway	0.560232
Huntington's Disease
	Aqp1	Transcription Factor Targets: SP1	0.614524
	Aqp1	Ion Transport
	Igf1	Dysregulated Processes: Apoptosis	0.678864
	Cd44	Transcription Factor Targets: SP1	0.530279
	Cd44	Dysregulated Processes: Apoptosis
	Tgm2	Transcription Factor Targets: SP1	0.660747
	Tgm2	Dysregulated Processes: Calcium Signaling / Homeostasis
	C3	Transcription Factor Targets: SP1	0.668922
	C3	Dysregulated Processes: Endocytosis
	Egfr	Huntingtin Cofactors	0.668606
	Egfr	Regulation of Synaptic Transmission
	Egfr	Dysregulated Processes: Apoptosis
	Egfr	Dysregulated Processes: Oxidation / Reduction
Neurogenesis and Neural Stem Cells
	Cxcl1	Cell Proliferation: Negative Regulation of Cell Proliferation	0.136438
	Cxcl1	Growth Factors and Cytokines: Growth Factors
	Cxcl1	Growth Factors and Cytokines: Cytokines
	Cxcl1	Cell Signaling Genes Involved in Neurogenesis: G-protein Coupled Receptor Protein Signaling Pathway
	Fgf2	Cell Proliferation: Positive Regulation of Cell Proliferation	0.405045
	Fgf2	Cell Cycle Genes: Other Regulators of the Cell Cycle
	Fgf2	Growth Factors and Cytokines: Growth Factors
	Pax3	Apoptosis: Other Genes Related to Apoptosis and Cell Death	0.528003
	Pax3	Regulation of Transcription
	Vegfa	Cell Proliferation: Positive Regulation of Cell Proliferation	0.441206
	Vegfa	Regulation of Cell Motility and Cell Migration
	Vegfa	Growth Factors and Cytokines: Growth Factors
	Vegfa	Apoptosis: Other Genes Related to Apoptosis and Cell Death
Wound Healing
	Il6	Inflammatory Cytokines & Chemokines	0.205108
	Cxcl1	Inflammatory Cytokines & Chemokines	0.136438
	Tnf	Growth Factors	0.269004
	Timp1	Extracellular Matrix & Cell Adhesion Remodeling Enzymes	0.316874
	Igf1	Growth Factors	0.678864
	Fgf2	Growth Factors	0.405045
	Mmp9	Extracellular Matrix & Cell Adhesion Remodeling Enzymes	0.327051
	Itga5	Extracellular Matrix & Cell Adhesion Cellular Adhesion	0.473842
	Wisp1	Signal Transduction WNT	0.614738
	Tgfa	Growth Factors	0.416868
	Egfr	Signal Transduction Receptors	0.668606
	Tgfb1	Growth Factors	0.630078
	Tgfb1	Signal Transduction TGFß
	Vegfa	Growth Factors	0.441206
Diabetes
	Il6	Secreted Factors	0.205108
	Tnf	Secreted Factors	0.269004
	Ccr2	Receptors, Transporters & Channels	0.60874
	Hmox1	Metabolic Enzymes	0.424526
	Icam1	Receptors, Transporters & Channels	0.484995
	Tnfrsf1b	Receptors, Transporters & Channels	0.443301
	Pfkfb3	Metabolic Enzymes	0.543546
	Il4ra	Receptors, Transporters & Channels	0.506977
	Enpp1	Metabolic Enzymes	0.591222
	Tnfrsf1a	Receptors, Transporters & Channels	0.612839
	Tgfb1	Secreted Factors	0.630078
	Vegfa	Secreted Factors	0.441206
	Cd28	Receptors, Transporters & Channels	0.57403
	Nfkb1	Transcription Factors	0.667826
	Vamp3	Receptors, Transporters & Channels	0.584451
Hepatotoxicity
	Hmox1	Hepatotoxicity: Up-Regulated	0.424526
	Icam1	Cholestasis	0.484995
	Map3k6	Necrosis: Up-Regulated	0.658063
	Lgr5	Necrosis: Down-Regulated	0.59606
	Krt8	Hepatotoxicity: Up-Regulated	0.60238
	Krt8	Nongenotoxic Hepatocarcinogenicity: Up-Regulated
	Col4a1	Necrosis: Up-Regulated	0.518061
	Cd36	Steatosis: Up-Regulated	0.450298
	Btg2	Hepatotoxicity: Up-Regulated	0.626397
	Btg2	Nongenotoxic Hepatocarcinogenicity: Up-Regulated
	Serpine1	Necrosis: Up-Regulated	0.311944
	S100a8	Phospholipidosis: Up-Regulated	0.132705
	Krt18	Hepatotoxicity: Up-Regulated	0.560232
	Krt18	Nongenotoxic Hepatocarcinogenicity: Up-Regulated
	Avpr1a	Hepatotoxicity: Down-Regulated	0.608952
Antiviral Response
	Il6	Toll-Like Receptor Signaling: Responsive Genes	0.205108
	Tnf	Toll-Like Receptor Signaling: Downstream Signaling	0.269004
	Tnf	RIG-I-Like Receptor Signaling: Downstream Signaling
	Mefv	Nod-Like Receptor Signaling: Receptors and Signaling	0.329842
	Il1b	Toll-Like Receptor Signaling: Responsive Genes	0.237748
	Il1b	Nod-Like Receptor Signaling: Responsive Genes
	Spp1	Toll-Like Receptor Signaling: Downstream Signaling	0.358786
	Cd86	Toll-Like Receptor Signaling: Responsive Genes	0.478185
	Ifnb1	Toll-Like Receptor Signaling: Responsive Genes	0.31296
	Ifnb1	RIG-I-Like Receptor Signaling: Responsive Genes
	Ifnb1	Type-I-Interferon Signaling and Response: Signaling Pathway
	Cd80	Toll-Like Receptor Signaling: Responsive Genes	0.534045
	Fos	Toll-Like Receptor Signaling: Downstream Signaling	0.247145
	Trim25	RIG-I-Like Receptor Signaling: Receptors and Chaperones	0.568652
	Nfkb1	Toll-Like Receptor Signaling: Downstream Signaling	0.667826
	Nfkb1	RIG-I-Like Receptor Signaling: Downstream Signaling
Apoptosis
	Tnf	TNF Ligand Family	0.269004
	Tnf	Anti-Apoptosis
	Tnfrsf10b	TNF Receptor Family	0.438278
	Casp4	Caspase Family	0.490643
	Casp4	CARD Family
	Birc3	IAP Family	0.452345
	Birc3	CARD Family
	Birc3	Anti-Apoptosis
	Tnfrsf1a	TNF Receptor Family	0.612839
	Mcl1	Bcl-2 Family	0.570873
	Mcl1	Anti-Apoptosis
	Traf1	TRAF Family	0.630186
	Nfkb1	Anti-Apoptosis	0.667826
	Casp8	Caspase Family	0.652087
	Casp8	Death Effector Domain Family
	Cd40	TNF Receptor Family	0.532657
Inflammasomes
	Il6	NOD-Like Receptors: Downstream Signaling	0.205108
	Cxcl1	NOD-Like Receptors: Downstream Signaling	0.136438
	Tnf	Inflammasomes: Negative Regulation	0.269004
	Tnf	NOD-Like Receptors: Downstream Signaling
	Mefv	Inflammasomes: Negative Regulation	0.329842
	Il1b	Inflammasomes: Downstream Signaling	0.237748
	Ccl5	NOD-Like Receptors: Downstream Signaling	0.60236
	Ifnb1	NOD-Like Receptors: Downstream Signaling	0.31296
	Birc3	NOD-Like Receptors: Downstream Signaling	0.452345
	Ptgs2	Inflammasomes: Downstream Signaling	0.57346
	Ccl7	NOD-Like Receptors: Downstream Signaling	0.54069
	Tnfsf14	Inflammasomes: Negative Regulation	0.374633
	Irf1	Inflammasomes: Downstream Signaling	0.619102
	Irf1	NOD-Like Receptors: Downstream Signaling
	Nfkb1	NOD-Like Receptors: Downstream Signaling	0.667826
	Casp8	NOD-Like Receptors: Downstream Signaling	0.652087
Cytoskeleton Regulators
	Msn	Cell Projections: Filopodium	0.557153
	Msn	Cell Projections: Microvilli
	Msn	Cell Motility / Migration
	Msn	Cytoskeleton Adaptor Activity
	Ssh1	Actin Filaments: Interacting Proteins	0.565383
	Ssh1	Actin Filaments: Organization & Biogenesis
	Ssh1	Cell Shape, Size, Polarity, Morphogenesis
	Ssh1	Kinases & Phophatases
	Cald1	Actin Filaments: Interacting Proteins	0.63208
	Cald1	Cell Motility / Migration
	Cald1	Calmodulin / Calcineurin
	Iqgap1	Actin Filaments: Organization & Biogenesis	0.664106
	Iqgap1	Calmodulin / Calcineurin
	Iqgap1	G-Protein Signaling
	Ppp1r12b	Cell Projections: Lamellipodium	0.57728
	Ppp1r12b	Kinases & Phophatases
Hedgehog Signaling Pathway
	Lrp2	Genes Involved in Hedgehog Signaling Pathway: Other Genes Invovled in Hedgehog Signaling Pathway	0.573387
	Lrp2	Regulators of Development: Nervous system development
	Bmp7	Genes Involved in Hedgehog Signaling Pathway: Other Genes Invovled in Hedgehog Signaling Pathway	0.514241
	Bmp7	Regulators of Cell Differentiation
	Bmp7	Regulators of Development: Cartilage Development
	Wnt1	Genes Involved in Hedgehog Signaling Pathway: Wnt Receptor Signaling Pathway	0.5871
	Wnt1	Regulators of Cell Differentiation
	Wnt1	Regulators of Development: Other Regulators for Multi-cellular Organism Development
	Sufu	Genes Involved in Hedgehog Signaling Pathway: Sonic Hedgehog (Shh) Pathway	0.536231
	Sufu	Regulators of Development: Skeletal Development
	Wnt16	Genes Involved in Hedgehog Signaling Pathway: Wnt Receptor Signaling Pathway	0.483344
	Wnt16	Regulators of Development: Other Regulators for Multi-cellular Organism Development
	Ihh	Genes Involved in Hedgehog Signaling Pathway: Hedgehog Family Members and Associated Proteins	0.555515
	Ihh	Genes Involved in Hedgehog Signaling Pathway: Other Genes Invovled in Hedgehog Signaling Pathway
	Ihh	Regulators of Cell Differentiation
	Ihh	Regulators of Development: Skeletal Development
Mesenchymal Stem Cell
	Il6	Other Genes Associated with MSC	0.205108
	Csf3	Other Genes Associated with MSC	0.127872
	Tnf	Other Genes Associated with MSC	0.269004
	Il1b	Other Genes Associated with MSC	0.237748
	Igf1	Other Genes Associated with MSC	0.678864
	Icam1	Other Genes Associated with MSC	0.484995
	Fgf2	Stemness Markers	0.405045
	Gdf15	MSC Differentiation Markers: Gene involved in Tenogenesis (Tendon Development)	0.543781
	Cd44	MSC-Specific Markers	0.530279
	Vim	Other Genes Associated with MSC	0.669082
	Itgax	MSC Differentiation Markers: Gene involved in Chondrogenesis	0.463031
	Bmp7	Other Genes Associated with MSC	0.514241
	Tgfb1	MSC Differentiation Markers: Gene involved in Myogenesis	0.630078
	Nes	Other Genes Associated with MSC	0.429052
	Vegfa	Other Genes Associated with MSC	0.441206
	Ptprc	Other Genes Associated with MSC	0.642186
WNT Signaling Pathway
	Fosl1	Developmental Processes: Cell Growth & Profileration	0.289537
	Fosl1	Cell Cycle
	Wisp1	Developmental Processes: Cell Growth & Profileration	0.614738
	Myc	WNT Signaling Target Genes	0.649207
	Myc	Developmental Processes: Cell Growth & Profileration
	Myc	Cell Cycle
	Myc	Cellular Homeostasis
	Sfrp4	WNT Signaling Pathways: Canonical	0.53971
	Sfrp4	WNT Signaling Negative Regulation
	Wnt1	WNT Signaling Pathways: Canonical	0.5871
	Wnt1	WNT Signaling Pathways: Wnt/Ca+2
	Wnt1	Developmental Processes: Cell Fate
	Wnt1	Cell Migration
	Wnt16	WNT Signaling Pathways: Canonical	0.483344
	Wnt16	WNT Signaling Pathways: Wnt/Ca+2
	Fbxw2	WNT Signaling Negative Regulation	0.523552
Synaptic Plasticity
	Tnf	Immediate-Early Response Genes (IEGs)	0.269004
	Tnf	Cell Adhesion
	Timp1	Extracellular Matrix & Proteolytic Processing	0.316874
	Cebpd	Immediate-Early Response Genes (IEGs)	0.461889
	Igf1	Long Term Depression (LTD)	0.678864
	Synpo	Late Response Genes	0.432414
	Synpo	Postsynaptic Density
	Nr4a1	Immediate-Early Response Genes (IEGs)	0.521514
	Cebpb	Immediate-Early Response Genes (IEGs)	0.498544
	Fos	Immediate-Early Response Genes (IEGs)	0.247145
	Plat	Long Term Depression (LTD)	0.641815
	Klf10	Immediate-Early Response Genes (IEGs)	0.593822
	Junb	Immediate-Early Response Genes (IEGs)	0.497581
	Egr2	Immediate-Early Response Genes (IEGs)	0.361329
	Nfkb1	Immediate-Early Response Genes (IEGs)	0.667826
	Grm4	Neuronal Receptors	0.666202
	Egr1	Immediate-Early Response Genes (IEGs)	0.588736
Necrosis
	Tnf	Necrosis: Regulation of Necrosis	0.269004
	Tnf	Apoptosis: Pro-Apoptosis
	Tnf	Apoptosis: Anti-Apoptosis
	Tnfrsf1b	Death Receptor Signaling	0.443301
	Tnfrsf1b	Apoptosis: Anti-Apoptosis
	Tnfrsf10b	Death Domain Receptors	0.438278
	Tnfrsf10b	Apoptosis: Pro-Apoptosis
	Ripk3	Necrosis: Other Necrosis Genes	0.519294
	Ripk3	Potential Necrosis Genes: RIPK1 Interactors
	Ripk3	Apoptosis: Pro-Apoptosis
	Eda2r	Death Receptor Signaling	0.638133
	Tnfrsf1a	Apoptosis: Anti-Apoptosis	0.612839
	Cybb	Reactive Oxygen Species (ROS) Activity	0.54094
	Cybb	Mitochondrial Genes
	Pvr	Necrosis: Required for TNF-Induced Necrosis	0.564729
	Nfkb1	Potential Necrosis Genes: RIPK1 Interactors	0.667826
	Nfkb1	Apoptosis: Anti-Apoptosis
p53 Signaling Pathway
	Il6	Cell Growth, Proliferation and Differentiation: Cytokines	0.205108
	Il6	Cell Motility and Adhesion: Extracellular Matrix (ECM) Proteins
	Tnf	Apoptosis: Induction of Apoptosis	0.269004
	Tnf	Cell Growth, Proliferation and Differentiation: Cytokines
	Tnf	Cell Growth, Proliferation and Differentiation: Regulation of Cell Proliferation
	Tnfrsf10b	Apoptosis: Other Genes Related to Apoptosis	0.438278
	Mcl1	Apoptosis: Regulation of Apoptosis	0.570873
	Myc	Apoptosis: Induction of Apoptosis	0.649207
	Myc	Cell Growth, Proliferation and Differentiation: Regulation of Cell Proliferation
	Myc	Transcription Factors
	Traf1	Apoptosis: Other Genes Related to Apoptosis	0.630186
	Btg2	Apoptosis: Regulation of Apoptosis	0.626397
	Btg2	Cell Growth, Proliferation and Differentiation: Cell Differentiation
	Rev3l	DNA Repair	0.655675
	Nfkb1	Apoptosis: Other Genes Related to Apoptosis	0.667826
	Nfkb1	Transcription Factors
	Egr1	Cell Growth, Proliferation and Differentiation: Other Genes Related to Cell Growth, Proliferation, and Differentiation	0.588736
Skeletal Muscle: Myogenesis & Myopathy
	Il6	Skeletal Muscle Autocrine Signaling	0.205108
	Tnf	Skeletal Muscle Wasting/Atrophy Dystrophy	0.269004
	Il1b	Skeletal Muscle Wasting/Atrophy Dystrophy	0.237748
	Igf1	Skeletal Myogenesis	0.678864
	Igf1	Skeletal Muscle Hypertrophy
	Igf1	Skeletal Muscle Autocrine Signaling
	Fgf2	Skeletal Muscle Autocrine Signaling	0.405045
	Mmp9	Skeletal Muscle Wasting/Atrophy Dystrophy	0.327051
	Igfbp3	Skeletal Myogenesis	0.428157
	Rps6kb1	Skeletal Muscle Contractility Other	0.634918
	Rps6kb1	Skeletal Myogenesis
	Rps6kb1	Skeletal Muscle Hypertrophy
	Rps6kb1	Skeletal Muscle Wasting/Atrophy Autophagy
	Pax3	Skeletal Myogenesis	0.528003
	Cast	Skeletal Myogenesis	0.600884
	Tgfb1	Skeletal Muscle Autocrine Signaling	0.630078
	Cav1	Skeletal Myogenesis	0.701796
	Nfkb1	Skeletal Muscle Wasting/Atrophy Dystrophy	0.667826
Signal Transduction PathwayFinder
	Cxcl1	NFκB Pathway	0.136438
	Ccl2	LDL Pathway	0.406599
	Il1a	NFκB Pathway	0.294544
	Icam1	NFκB Pathway	0.484995
	Icam1	Phospholipase C Pathway
	Igfbp3	p53 Pathway	0.428157
	Il4ra	Jak-Stat Pathway	0.506977
	Wisp1	Wnt Pathway	0.614738
	Ptgs2	Phospholipase C Pathway	0.57346
	Fos	Mitogenic Pathway	0.247145
	Fos	CREB Pathway
	Fos	Calcium and Protein Kinase C Pathway
	Myc	Wnt Pathway	0.649207
	Wnt1	Hedgehog Pathway	0.5871
	Odc1	Calcium and Protein Kinase C Pathway	0.549298
	Vegfa	Wnt Pathway	0.441206
	Irf1	Jak-Stat Pathway	0.619102
	Egr1	CREB Pathway	0.588736
	Egr1	Phospholipase C Pathway
Cell Surface Markers
	Il1r2	B-cell Surface Markers: Mature B-cells	0.295876
	Il1r2	Monocyte and Macrophage Cell Surface Markers: Other Monocyte and Macrophage Surface Markers
	Cd244	Natural Killer (NK) Cell Surface Markers	0.607309
	H2-Q10	B-cell Surface Markers: Other B-cell Surface Markers	0.308778
	Selp	Endothelial Cell Surface Markers	0.283685
	Cd8b1	T-cell surface markers: Cytotoxic T-cells	0.547098
	Cd86	B-cell Surface Markers: Activated B-cells	0.478185
	Cd86	Monocyte and Macrophage Cell Surface Markers: Other Monocyte and Macrophage Surface Markers
	Cd86	Dendritic Cell Surface Markers
	Cd80	B-cell Surface Markers: Activated B-cells	0.534045
	Cd72	B-cell Surface Markers: Mature B-cells	0.519359
	Krt8	Epithelial Cell Surface Markers	0.60238
	Klrd1	T-cell surface markers: Other T-cell Surface Markers	0.427217
	Klrd1	Natural Killer (NK) Cell Surface Markers
	Myh9	Smooth Muscle Cell Surface Markers	0.63544
	Cd28	B-cell Surface Markers: Activated B-cells	0.57403
	Cd28	T-cell surface markers: Other T-cell Surface Markers
	S100a8	Monocyte and Macrophage Cell Surface Markers: Other Monocyte and Macrophage Surface Markers	0.132705
	Cd24a	B-cell Surface Markers: Mature B-cells	0.583158
	Krt18	Epithelial Cell Surface Markers	0.560232
Neurotoxicity
	Arg1	Up-Regulated: Nitric Oxide Response	0.297158
	Angptl4	Up-Regulated: Other	0.593852
	Cd8b1	Up-Regulated: Signal Transduction	0.547098
	Mmp9	Up-Regulated: Development	0.327051
	Tnfrsf10b	Up-Regulated: Apoptosis	0.438278
	Tnfrsf10b	Up-Regulated: Metabolism (Regulation & Mechanism)
	Tnfrsf10b	Up-Regulated: Signal Transduction
	Slc16a3	Up-Regulated: Metabolism (Regulation & Mechanism)	0.35433
	Slc16a3	Up-Regulated: Nitric Oxide Response
	Heph	Up-Regulated: Development	0.548988
	Heph	Up-Regulated: Ion Transpor
	Col12a1	Down-Regulated: Other	0.5014
	Gch1	Up-Regulated: Apoptosis	0.579117
	Gch1	Up-Regulated: Nitric Oxide Response
	Pappa	Up-Regulated: Other	0.66295
	Nfkb1	Up-Regulated: Metabolism (Regulation & Mechanism)	0.667826
	Egln3	Down-Regulated: Other	0.644284
	Ywhae	Up-Regulated: Apoptosis	0.595084
	Ywhae	Up-Regulated: Development
	Ywhae	Up-Regulated: Metabolism (Regulation & Mechanism)
	Ywhae	Up-Regulated: Signal Transduction
Th17 for Autoimmunity & Inflammation
	Mmp3	Matrix Metalloproteinases	0.408738
	Il6	Cytokines	0.205108
	Cxcl1	Chemokines	0.136438
	Cxcl2	Chemokines	0.0566454
	Csf3	Cytokines	0.127872
	Ccl2	Chemokines	0.406599
	Tnf	Cytokines	0.269004
	Mmp13	Matrix Metalloproteinases	0.247541
	Il1b	Cytokines	0.237748
	Tbx21	Signaling Pathway Molecules and Transcriptional Factors	0.151198
	Icam1	Surface Molecules	0.484995
	Socs3	Signaling Pathway Molecules and Transcriptional Factors	0.470682
	Mmp9	Matrix Metalloproteinases	0.327051
	Clec7a	Signaling Pathway Molecules and Transcriptional Factors	0.527907
	Cebpb	Signaling Pathway Molecules and Transcriptional Factors	0.498544
	Il17rb	Cytokine Receptors	0.480604
	Tgfb1	Cytokines	0.630078
	Ccl7	Chemokines	0.54069
	Isg20	Surface Molecules	0.663382
	Cd28	Surface Molecules	0.57403
	Nfkb1	Signaling Pathway Molecules and Transcriptional Factors	0.667826
Cellular Senescence
	Thbs1	Senescence Responses: Cytoskeleton Related	0.187027
	Thbs1	Senescence Responses: Cell Adhesion
	Igf1	Senescence Initiators: Insulin Growth Factor (IGF) Related	0.678864
	Cd44	Senescence Responses: Cell Adhesion	0.530279
	Igfbp3	Senescence Initiators: p53/pRb Signaling (Cell cycle)	0.428157
	Igfbp3	Senescence Initiators: Interferon Related
	Igfbp3	Senescence Initiators: Insulin Growth Factor (IGF) Related
	Igfbp3	Senescence Responses: p53 Effectors
	Myc	Senescence Initiators: p53/pRb Signaling (Cell cycle)	0.649207
	Myc	Senescence Responses: p53 Effectors
	Vim	Senescence Responses: Cytoskeleton Related	0.669082
	Tgfb1	Senescence Initiators: p53/pRb Signaling (Cell cycle)	0.630078
	Tgfb1	Senescence Responses: Cell Adhesion
	Ets1	Senescence Pathway	0.531623
	Col3a1	Senescence Responses: Cell Adhesion	0.525179
	Nfkb1	Senescence Initiators: Interferon Related	0.667826
	Aldh1a3	Senescence Initiators: p53/pRb Signaling (Cell cycle)	0.579222
	Aldh1a3	Senescence Initiators: Interferon Related
	Aldh1a3	Senescence Initiators: Oxidative Stress
	Aldh1a3	Senescence Responses: p53 Effectors
	Egr1	Senescence Initiators: Interferon Related	0.588736
Tumor Metastasis
	Mmp3	Extracellular Matrix Proteins: Matrix Metalloproteinases	0.408738
	Mmp13	Extracellular Matrix Proteins: Matrix Metalloproteinases	0.247541
	Plaur	Cell Growth and Proliferation Genes: Receptors	0.252299
	Il1b	Cell Cycle Genes: Regulation of the Cell Cycle	0.237748
	Il1b	Cell Growth and Proliferation Genes: Cytokines and Chemokines
	Igf1	Cell Growth and Proliferation Genes: Growth Factors and Hormones	0.678864
	Mmp9	Extracellular Matrix Proteins: Matrix Metalloproteinases	0.327051
	Cd44	Cell Adhesion Genes: Transmembrane Receptors	0.530279
	Il8rb	Cell Growth and Proliferation Genes: Receptors	0.279758
	Myc	Cell Growth and Proliferation Genes: Regulation of Cell Proliferation	0.649207
	Myc	Apoptosis genes: Induction of Apoptosis
	Myc	Transcription Factors and Regulators: Transcription Factors
	Col4a2	Extracellular Matrix Proteins: Other ECM Proteins	0.561536
	Tgfb1	Cell Cycle Genes: Regulation of the Cell Cycle	0.630078
	Tgfb1	Cell Growth and Proliferation Genes: Regulation of Cell Proliferation
	Tgfb1	Cell Growth and Proliferation Genes: Growth Factors and Hormones
	Ccl7	Cell Growth and Proliferation Genes: Cytokines and Chemokines	0.54069
	Kiss1	Cell Growth and Proliferation Genes: Regulation of Cell Proliferation	0.563657
	Vegfa	Cell Cycle Genes: Regulation of the Cell Cycle	0.441206
	Vegfa	Cell Growth and Proliferation Genes: Growth Factors and Hormones
	Cxcr4	Cell Growth and Proliferation Genes: Receptors	0.494587
T Cell Activation
	Rgs1	B-cell Activation: Other Genes Involved in B-cell Activation	0.340036
	Spp1	T-cell Activation: T-Cell Proliferation	0.358786
	Cd8b1	T-cell Activation: Regulators of T-Cell Activation	0.547098
	Gadd45g	T-cell Activation: T-Cell Differentiation	0.510569
	Cd93	Other Genes Related to Immune Cell Activation: Macrophage Activation	0.433201
	Tlr6	Other Genes Related to Immune Cell Activation: Macrophage Activation	0.620525
	Tnfsf14	T-cell Activation: Regulators of T-Cell Activation	0.374633
	Tnfsf14	T-cell Activation: T-Cell Proliferation
	Cd28	B-cell Activation: Antigen Dependent B-Cell Activation	0.57403
	Cd28	T-cell Activation: T-Cell Proliferation
	Cd28	T-cell Activation: Genes Involved in Th1 / Th2 Differentiation
	H2-Aa	T-cell Activation: T-Cell Differentiation	0.567764
	Relb	Other Genes Related to Immune Cell Activation: Dendritic Cell Differentiation	0.585852
	Ptprc	B-cell Activation: B-Cell Proliferation	0.642186
	Ptprc	B-cell Activation: B-cell Differentiation
	Ptprc	T-cell Activation: T-Cell Proliferation
	Ptprc	T-cell Activation: T-Cell Differentiation
	Ptprc	Other Genes Related to Immune Cell Activation: Thymocyte Cell Differentiation
	Il11	B-cell Activation: B-cell Differentiation	0.185079
	Cxcr4	T-cell Activation: T-Cell Proliferation	0.494587
	Egr1	Other Genes Related to Immune Cell Activation: Thymocyte Cell Differentiation	0.588736
	Blr1	B-cell Activation: Other Genes Involved in B-cell Activation	0.259246
T-cell Anergy and Immune Tolerance
	Il6	Cytokines, Receptors and their related Proteins	0.205108
	Sell	Other Genes involved in T-cell Anergy	0.210105
	Lgals3	Other Genes involved in T-cell Anergy	0.471302
	Ccl3	Cytokines, Receptors and their related Proteins	0.237298
	Tbx21	Transcriptional Regulators	0.151198
	Il1a	Cytokines, Receptors and their related Proteins	0.294544
	Icam1	Other Genes involved in T-cell Anergy	0.484995
	Tnfrsf10b	TNF Superfamily Members and their Receptors	0.438278
	Ptgs2	Cytokines, Receptors and their related Proteins	0.57346
	Fos	Transcriptional Regulators	0.247145
	Eomes	Transcriptional Regulators	0.160087
	Tgfb1	T-Cell Regulators	0.630078
	Tgfb1	Cytokines, Receptors and their related Proteins
	Tgfb1	Transcriptional Regulators
	Tnfrsf18	TNF Superfamily Members and their Receptors	0.549572
	Tnfsf14	T-Cell Regulators	0.374633
	Tnfsf14	Cytokines, Receptors and their related Proteins
	Tnfsf14	TNF Superfamily Members and their Receptors
	Cd28	T-Cell Regulators	0.57403
	Egr2	Transcriptional Regulators	0.361329
	Nfkb1	Transcriptional Regulators	0.667826
	Cd40	B-Cell Regulators	0.532657
	Itch	Other Genes involved in T-cell Anergy	0.603148
T Helper Cell Differentiation
	Tnf	Cytokines & Receptors	0.269004
	Tnf	T Helper 1 Subtype Markers
	Ccl11	Cytokines & Receptors	0.257103
	Ccl11	T Helper 2 Subtype Markers
	Il1r2	Cytokines & Receptors	0.295876
	Il1r2	Epigenetically Regulated Genes: Conventional Versus Regulatory T Cells
	Fosl1	Transcription Factors	0.289537
	Tbx21	Epigenetically Regulated Genes: Th1 Cells	0.151198
	Il18rap	Cytokines & Receptors	0.322317
	Il18rap	Epigenetically Regulated Genes: Th1 Cells
	Il4ra	Cytokines & Receptors	0.506977
	Il4ra	T Helper 2 Subtype Markers
	Runx1	Transcription Factors	0.507132
	Nr4a1	Transcription Factors	0.521514
	Nr4a1	Epigenetically Regulated Genes: Inducible and Natural Regulatory T (iTreg and nTreg) Cells
	Cebpb	T Helper 2 Subtype Markers	0.498544
	Cebpb	Transcription Factors
	Il13ra1	Cytokines & Receptors	0.477971
	Il13ra1	T Helper 2 Subtype Markers
	Tlr6	T Helper 1 Subtype Markers	0.620525
	Uts2	Epigenetically Regulated Genes: Conventional Versus Regulatory T Cells	0.31665
	Irf1	T Helper 1 Subtype Markers	0.619102
	Chd7	Epigenetically Regulated Genes: Conventional Versus Regulatory T Cells	0.639894
Insulin Signaling Pathway
	Cebpb	Primary Target Genes for Insulin Signaling	0.498544
	Cebpb	Target genes for PPARγ
	Cebpb	Protein Metabolism Other Protein Metabolism Genes
	Cebpb	Transcription Factors and Regulators
	Cebpb	Cell Growth and Differentiation Cell Differentiation
	Prl	Primary Target Genes for Insulin Signaling	0.0291799
	Fos	MAPK Pathway Target Genes	0.247145
	Fos	Primary Target Genes for Insulin Signaling
	Fos	Transcription Factors and Regulators
	Ucp1	PI-3 Kinase Pathway Target Genes	0.508581
	Ucp1	MAPK Pathway Target Genes
	Ucp1	Protein Metabolism Other Protein Metabolism Genes
	Vegfa	PI-3 Kinase Pathway Target Genes	0.441206
	Vegfa	Cell Growth and Differentiation Cell Cycle
	Vegfa	Cell Growth and Differentiation Cell Proliferation
	Vegfa	Cell Growth and Differentiation Growth Factors and Receptors
	Serpine1	PI-3 Kinase Pathway Target Genes	0.311944
	Serpine1	Protein Metabolism Other Protein Metabolism Genes
	Ldlr	Lipid Metabolism Cholesterol Metabolism	0.523675
	Ldlr	Lipid Metabolism Lipid Transport
	Ldlr	Protein Metabolism Other Protein Metabolism Genes
	Raf1	MAPK Pathway Components	0.533653
	Raf1	Lipid Metabolism Other Lipid Metabolism Genes
	Raf1	Protein Metabolism Protein Amino Acid Phosphorylation
Chemokines & Receptors
	Cxcl1	Chemokine (C-X-C motif) Ligands	0.136438
	Cxcl2	Chemokine (C-X-C motif) Ligands	0.0566454
	Ccl2	Chemokine (C-C motif) Ligands	0.406599
	Tnf	Other Chemokines and Related Genes	0.269004
	Trem1	Other Chemokines and Related Genes	0.151577
	Ccl11	Chemokine (C-C motif) Ligands	0.257103
	Ccr2	Chemokine (C-C motif) Receptors	0.60874
	Ccl5	Chemokine (C-C motif) Ligands	0.60236
	Ccl6	Chemokine (C-C motif) Ligands	0.420596
	Il1a	Other Chemokines and Related Genes	0.294544
	Il8rb	Other Chemokines and Related Genes	0.279758
	Ccr7	Chemokine (C-C motif) Receptors	0.397733
	Tnfrsf1a	Other Chemokines and Related Genes	0.612839
	Cxcl13	Chemokine (C-X-C motif) Ligands	0.381843
	Cxcl4	Chemokine (C-X-C motif) Ligands	0.317195
	Inhbb	Other Chemokines and Related Genes	0.587289
	Ccl4	Chemokine (C-C motif) Ligands	0.270512
	Ccrl2	Chemokine (C-C motif) Receptors	0.437018
	Ccl7	Chemokine (C-C motif) Ligands	0.54069
	Tnfsf14	Other Chemokines and Related Genes	0.374633
	Nfkb1	Other Chemokines and Related Genes	0.667826
	Ccl9	Chemokine (C-C motif) Ligands	0.376584
	Cxcr4	Chemokine (C-X-C motif) Receptors	0.494587
	Blr1	Chemokine (C-X-C motif) Receptors	0.259246
Angiogenesis
	Il6	Other factors involved in angiogenesis: Cytokines and chemokines	0.205108
	Csf3	Other factors involved in angiogenesis: Cytokines and chemokines	0.127872
	Ccl2	Other factors involved in angiogenesis: Cytokines and chemokines	0.406599
	Tnf	Other factors involved in angiogenesis: Cytokines and chemokines	0.269004
	Ccl11	Other factors involved in angiogenesis: Cytokines and chemokines	0.257103
	Thbs1	Angiogenic factors: Adhesion molecules	0.187027
	Timp1	Other factors involved in angiogenesis: Proteases, inhibitors and other matrix proteins	0.316874
	Il1b	Other factors involved in angiogenesis: Cytokines and chemokines	0.237748
	Mmp19	Angiogenic factors: Proteases, inhibitors and other matrix proteins	0.406513
	Igf1	Other factors involved in angiogenesis: Other growth factors and receptors	0.678864
	Fgf2	Angiogenic factors: Growth factors and receptors	0.405045
	Mmp9	Other factors involved in angiogenesis: Proteases, inhibitors and other matrix proteins	0.327051
	Tnfaip2	Angiogenic factors: Transcription factors and others	0.389448
	Sphk1	Other factors involved in angiogenesis: Transcription factors and others	0.417217
	Cdh5	Other factors involved in angiogenesis: Adhesion molecules	0.386668
	Tgfa	Other factors involved in angiogenesis: Other growth factors and receptors	0.416868
	Tgfb1	Other factors involved in angiogenesis: Other growth factors and receptors	0.630078
	Vegfa	Angiogenic factors: Growth factors and receptors	0.441206
	Pgf	Angiogenic factors: Growth factors and receptors	0.633246
	Col18a1	Angiogenic factors: Growth factors and receptors	0.631653
	Col18a1	Angiogenic factors: Adhesion molecules
	Lama5	Other factors involved in angiogenesis: Adhesion molecules	0.590839
	Flt1	Angiogenic factors: Growth factors and receptors	0.66531
	Plxdc1	Other factors involved in angiogenesis: Other growth factors and receptors	0.638369
EGF / PDGF Signaling
	Fos	Metabolism: DNA Metabolism	0.247145
	Fos	Metabolism: Protein Metabolism
	Fos	Response to Stimulus: Response to Other Stimuli
	Fos	Transcription Factors & Regulators
	Rps6kb1	Intracellular Signaling Molecules: Other Intracellular Signaling Molecules	0.634918
	Rps6kb1	Metabolism: Protein Metabolism
	Egfr	Epidermal Growth Factor Receptor Signaling Pathway	0.668606
	Egfr	Intracellular Signaling Molecules: ERK1 / ERK2 MAPK Signaling Pathway
	Egfr	Intracellular Signaling Molecules: MAPKKK Cascade
	Egfr	Cell Survival & Growth: Cell Cycle
	Egfr	Cell Survival & Growth: Cell Motility
	Egfr	Cell Survival & Growth: Cell Proliferation
	Egfr	Metabolism: DNA Metabolism
	Egfr	Metabolism: Protein Metabolism
	Egfr	Response to Stimulus: Response to Other Stimuli
	Egfr	Actin and Calcium Ion Homeostasis
	Nfkb1	Intracellular Signaling Molecules: AKT Signaling Pathway	0.667826
	Nfkb1	Cell Survival & Growth: Apoptosis
	Nfkb1	Response to Stimulus: Response to Wounding
	Nfkb1	Transcription Factors & Regulators
	Raf1	Intracellular Signaling Molecules: ERK1 / ERK2 MAPK Signaling Pathway	0.533653
	Raf1	Cell Survival & Growth: Apoptosis
	Raf1	Cell Survival & Growth: Cell Proliferation
	Raf1	Metabolism: Lipid Metabolism
	Raf1	Metabolism: Protein Metabolism
	Egr1	Transcription Factors & Regulators	0.588736
Inflammatory Cytokines & Receptors
	Cxcl1	Chemokine Genes	0.136438
	Ccl2	Chemokine Genes	0.406599
	Tnf	Cytokine Genes	0.269004
	Ccl11	Chemokine Genes	0.257103
	Il1r2	Cytokine Receptors	0.295876
	Ccr2	Chemokine Receptors	0.60874
	Il1b	Cytokine Genes	0.237748
	Spp1	Cytokine Genes	0.358786
	Ccl3	Chemokine Genes	0.237298
	Ccl5	Chemokine Genes	0.60236
	Ccl6	Chemokine Genes	0.420596
	Il1a	Cytokine Genes	0.294544
	Il8rb	Chemokine Receptors	0.279758
	Il8rb	Other Genes Involved in Inflammatory Response
	Ccr7	Chemokine Receptors	0.397733
	Il13ra1	Cytokine Receptors	0.477971
	Cxcl13	Chemokine Genes	0.381843
	Cxcl4	Chemokine Genes	0.317195
	Ccl4	Chemokine Genes	0.270512
	C3	Other Genes Involved in Inflammatory Response	0.668922
	Tgfb1	Cytokine Genes	0.630078
	Ccl7	Chemokine Genes	0.54069
	Itgb2	Cytokine Genes	0.662683
	Ccl9	Chemokine Genes	0.376584
	Il11	Cytokine Genes	0.185079
	Itgam	Cytokine Genes	0.627779
	Blr1	Other Genes Involved in Inflammatory Response	0.259246
Dendritic and Antigen Presenting Cell
	Il6	Cytokines, Chemokines and Their Receptors	0.205108
	Cxcl1	Cytokines, Chemokines and Their Receptors	0.136438
	Cxcl2	Cytokines, Chemokines and Their Receptors	0.0566454
	Ccl2	Cytokines, Chemokines and Their Receptors	0.406599
	Tnf	Cytokines, Chemokines and Their Receptors	0.269004
	Ccl11	Cytokines, Chemokines and Their Receptors	0.257103
	Ccr2	Cytokines, Chemokines and Their Receptors	0.60874
	Ccl3	Cytokines, Chemokines and Their Receptors	0.237298
	Ccl5	Cytokines, Chemokines and Their Receptors	0.60236
	Cd86	Antigen Presentation	0.478185
	Tlr2	Cell Surface Receptors	0.423457
	Icam1	Antigen Uptake	0.484995
	Cd44	Antigen Uptake	0.530279
	Cd80	Antigen Presentation	0.534045
	Nfkb2	Signal Transduction	0.586012
	Ccl4	Cytokines, Chemokines and Their Receptors	0.270512
	Cd36	Cell Surface Receptors	0.450298
	Ccl7	Cytokines, Chemokines and Their Receptors	0.54069
	Itgb2	Signal Transduction	0.662683
	Cd28	Antigen Presentation	0.57403
	Fcer1g	Antigen Presentation	0.644868
	Nfkb1	Signal Transduction	0.667826
	Cd40	Antigen Presentation	0.532657
	Cd40	Cell Surface Receptors
	Relb	Signal Transduction	0.585852
	Cxcr4	Cytokines, Chemokines and Their Receptors	0.494587
	Itgam	Signal Transduction	0.627779
Fibrosis
	Mmp3	Extracellular Matrix & Cell Adhesion: Remodeling Enzymes	0.408738
	Tnf	Inflammatory Cytokines & Chemokines	0.269004
	Thbs1	Signal Transduction: TGFß Superfamily	0.187027
	Timp1	Extracellular Matrix & Cell Adhesion: Remodeling Enzymes	0.316874
	Timp1	Epithelial-to-Mesenchymal Transition
	Mmp13	Extracellular Matrix & Cell Adhesion: Remodeling Enzymes	0.247541
	Ccr2	Inflammatory Cytokines & Chemokines	0.60874
	Il1b	Inflammatory Cytokines & Chemokines	0.237748
	Lox	Extracellular Matrix & Cell Adhesion: Remodeling Enzymes	0.31344
	Il1a	Inflammatory Cytokines & Chemokines	0.294544
	Edn1	Growth Factors	0.442121
	Mmp9	Epithelial-to-Mesenchymal Transition	0.327051
	Cebpb	Signal Transduction: Transcription Factors	0.498544
	Myc	Signal Transduction: Transcription Factors	0.649207
	Snai1	Pro-Fibrotic	0.610365
	Bmp7	Anti-Fibrotic	0.514241
	Bmp7	Signal Transduction: TGFß Superfamily
	Bmp7	Epithelial-to-Mesenchymal Transition
	Tgfb1	Epithelial-to-Mesenchymal Transition	0.630078
	Dcn	Signal Transduction: TGFß Superfamily	0.551121
	Mmp8	Extracellular Matrix & Cell Adhesion: Remodeling Enzymes	0.09584
	Vegfa	Growth Factors	0.441206
	Col3a1	Epithelial-to-Mesenchymal Transition	0.525179
	Mmp14	Extracellular Matrix & Cell Adhesion: Remodeling Enzymes	0.674661
	Cav1	Signal Transduction: TGFß Superfamily	0.701796
	Nfkb1	Signal Transduction: Transcription Factors	0.667826
	Cxcr4	Inflammatory Cytokines & Chemokines	0.494587
Transcription Factors
	Cebpb	Other Transcription Factors	0.498544
	Fos	EGF Signaling Pathway	0.247145
	Fos	IGF-1 Signaling Pathway
	Fos	Insulin Signaling Pathway
	Fos	PDGF Signaling Pathway
	Fos	G-Protein-Coupled Receptor Signaling Pathways
	Fos	Toll-like Receptor Signaling Pathway
	Fos	T-Cell Receptor Signaling Pathway
	Fos	B-Cell Receptor Signaling Pathway
	Fos	EPO Signaling Pathway
	Fos	TPO Signaling Pathway
	Fos	MAPK Signaling Pathway: Other MAPK Signaling Pathways
	Myc	TGFβ / BMP Signaling Pathway	0.649207
	Myc	Wnt Signaling Pathway
	Myc	MAPK Signaling Pathway: Erk1 / Erk2 Signaling Pathway
	Myc	MAPK Signaling Pathway: p38 Signaling Pathway
	Myc	JAK / STAT Signaling Pathway
	Smad9	TGFβ / BMP Signaling Pathway	0.567849
	Junb	Other Transcription Factors	0.497581
	Ets1	Other Transcription Factors	0.531623
	Irf1	Other Transcription Factors	0.619102
	Nfkb1	Toll-like Receptor Signaling Pathway	0.667826
	Nfkb1	T-Cell Receptor Signaling Pathway
	Nfkb1	B-Cell Receptor Signaling Pathway
	Nfkb1	MAPK Signaling Pathway: Other MAPK Signaling Pathways
	Nfkb1	NFkB Signaling Pathway
	Atf3	Other Transcription Factors	0.461649
	Egr1	Other Transcription Factors	0.588736
G Protein Coupled Receptors
	Ccr2	Chemokine & Cytokine Receptors	0.60874
	Fpr1	Formyl Peptide Receptors	0.278423
	P2ry2	Purinergic (P2Y) Receptors	0.395494
	Gprc5a	Orphan G Protein-Coupled Receptors	0.329024
	Gipr	Others	0.522362
	Lgr5	Leucine-Rich Repeat-Containing G Protein-Coupled Receptors	0.59606
	Il8rb	Chemokine & Cytokine Receptors	0.279758
	Gprc5c	Orphan G Protein-Coupled Receptors	0.540112
	Ltb4r1	Leukotriene B4 & Thromboxane Receptors	0.506944
	Ccr7	Chemokine & Cytokine Receptors	0.397733
	Ptgir	Prostaglandin Receptors	0.452332
	Drd4	Dopamine Receptors	0.348158
	Emr4	Others	0.386981
	Lepr	Others	0.632485
	Gpr171	Orphan G Protein-Coupled Receptors	0.27611
	Gpr97	Orphan G Protein-Coupled Receptors	0.34206
	Ccrl2	Chemokine & Cytokine Receptors	0.437018
	Htr2b	Serotonin (5-Hydroxytryptamine) Receptors	0.461965
	Cysltr2	Cysteinyl Leukotriene Receptors	0.55912
	Ednra	Endothelin Receptors	0.590064
	Gpr115	Orphan G Protein-Coupled Receptors	0.602987
	Gpr68	Orphan G Protein-Coupled Receptors	0.499808
	Rxfp2	Relaxin/Insulin-Like Family Peptide Receptors	0.593153
	Gpr84	Orphan G Protein-Coupled Receptors	0.661808
	Oprm1	Opioid Receptors	0.616858
	Avpr1a	Arginine Vasopressin Receptors	0.608952
	Cxcr4	Chemokine & Cytokine Receptors	0.494587
	Grm4	Metabotropic Glutamate Receptors	0.666202
	Npsr1	Neuropeptide Receptors	0.603681
G-Protein-Coupled Receptor Signaling PathwayFinder
	Tnf	Pathways Related to G-Protein-Coupled Receptor Protein Signaling: MAPKKK Cascade	0.269004
	Tnf	Pathways Related to G-Protein-Coupled Receptor Protein Signaling: NO-cGMP Pathway
	Tnf	Pathways Related to G-Protein-Coupled Receptor Protein Signaling: I?B Kinase / NF?B Cascade
	Il1r2	Pathways Related to G-Protein-Coupled Receptor Protein Signaling: G-Protein Signaling, Coupled to cAMP Nucleotide Second Messenger (cAMP / PKA）	0.295876
	Il1r2	Pathways Related to G-Protein-Coupled Receptor Protein Signaling: PKC Pathway (Ca2+, MEK, etc.)
	Il1b	Pathways Related to G-Protein-Coupled Receptor Protein Signaling: Rho Pathway	0.237748
	Il1b	Pathways Related to G-Protein-Coupled Receptor Protein Signaling: I?B Kinase / NF?B Cascade
	Icam1	Pathways Related to G-Protein-Coupled Receptor Protein Signaling: I?B Kinase / NF?B Cascade	0.484995
	Edn1	G-Protein-Coupled Receptors (GPCR): Other G-Protein Coupled Receptors	0.442121
	Edn1	Pathways Related to G-Protein-Coupled Receptor Protein Signaling: G-Protein Signaling, Coupled to cAMP Nucleotide Second Messenger (cAMP / PKA）
	Edn1	Pathways Related to G-Protein-Coupled Receptor Protein Signaling: G-Protein Signaling, Coupled to IP3 Second Messenger (PLC)
	Mmp9	Pathways Related to G-Protein-Coupled Receptor Protein Signaling: PKC Pathway (Ca2+, MEK, etc.)	0.327051
	Ptgs2	Pathways Related to G-Protein-Coupled Receptor Protein Signaling: Rho Pathway	0.57346
	Ptgs2	Pathways Related to G-Protein-Coupled Receptor Protein Signaling: I?B Kinase / NF?B Cascade
	Fos	Pathways Related to G-Protein-Coupled Receptor Protein Signaling: PKC Pathway (Ca2+, MEK, etc.)	0.247145
	Fos	Pathways Related to G-Protein-Coupled Receptor Protein Signaling: Rho Pathway
	Myc	Pathways Related to G-Protein-Coupled Receptor Protein Signaling: PKC Pathway (Ca2+, MEK, etc.)	0.649207
	Ucp1	Pathways Related to G-Protein-Coupled Receptor Protein Signaling: G-Protein Signaling, Coupled to cAMP Nucleotide Second Messenger (cAMP / PKA）	0.508581
	Ucp1	Pathways Related to G-Protein-Coupled Receptor Protein Signaling: MAPKKK Cascade
	Junb	Pathways Related to G-Protein-Coupled Receptor Protein Signaling: PKC Pathway (Ca2+, MEK, etc.)	0.497581
	Vegfa	Pathways Related to G-Protein-Coupled Receptor Protein Signaling: G-Protein Signaling, Coupled to cAMP Nucleotide Second Messenger (cAMP / PKA）	0.441206
	Serpine1	Pathways Related to G-Protein-Coupled Receptor Protein Signaling: PKC Pathway (Ca2+, MEK, etc.)	0.311944
	Serpine1	Pathways Related to G-Protein-Coupled Receptor Protein Signaling: Rho Pathway
	Grm4	G-Protein-Coupled Receptors (GPCR): Metabotropic Glutamate, GABA-B-like Receptors	0.666202
	Grm4	Pathways Related to G-Protein-Coupled Receptor Protein Signaling: G-Protein Signaling, Coupled to cAMP Nucleotide Second Messenger (cAMP / PKA）
	Grm4	Pathways Related to G-Protein-Coupled Receptor Protein Signaling: Metabotropic Glutamate Receptor Pathway
	Grm4	Pathways Related to G-Protein-Coupled Receptor Protein Signaling: MAPKKK Cascade
	Egr1	Pathways Related to G-Protein-Coupled Receptor Protein Signaling: Calcium Signaling Pathway (PKC, NFAT, etc.)	0.588736
	Egr1	Pathways Related to G-Protein-Coupled Receptor Protein Signaling: PKC Pathway (Ca2+, MEK, etc.)
Growth Factor
	Il6	Apoptosis Regulators	0.205108
	Cxcl1	Other Growth Factors	0.136438
	Csf3	Other Growth Factors	0.127872
	Il1b	Other Growth Factors	0.237748
	Spp1	Apoptosis Regulators	0.358786
	Spp1	Cell Differentiation
	Igf1	Apoptosis Regulators	0.678864
	Igf1	Cell Differentiation
	Igf1	Development Controllers: Nervous System Development
	Igf1	Morphogenic Factors
	Il1a	Other Growth Factors	0.294544
	Fgf2	Angiogenic Growth Factors	0.405045
	Fgf2	Cell Differentiation
	Fgf2	Development Controllers: Lung Development
	Inhbb	Other Growth Factors	0.587289
	Bmp7	Cell Differentiation	0.514241
	Bmp7	Development Controllers: Cartilage Development
	Bmp7	Morphogenic Factors
	Tgfa	Angiogenic Growth Factors	0.416868
	Tgfb1	Development Controllers: Skeletal Development	0.630078
	Tgfb1	Morphogenic Factors
	Vegfa	Angiogenic Growth Factors	0.441206
	Vegfa	Apoptosis Regulators
	Vegfa	Cell Differentiation
	Vegfa	Development Controllers: Lung Development
	Pgf	Angiogenic Growth Factors	0.633246
	Pgf	Cell Differentiation
	Pgf	Development Controllers: Others
	Il11	Other Growth Factors	0.185079
Nephrotoxicity
	Timp1	Up-Regulated: Proliferation	0.316874
	Timp1	Up-Regulated: Tissue Remodeling
	Timp1	Up-Regulated: Extracellular Matrix
	Lcn2	Up-Regulated: Other	0.485476
	Lgals3	Up-Regulated: Extracellular Matrix	0.471302
	Spp1	Up-Regulated: Tissue Remodeling	0.358786
	Hmox1	Up-Regulated: Apoptosis	0.424526
	Hmox1	Up-Regulated: Metal Ion Binding
	Hmox1	Up-Regulated: Oxidative Stress
	Hmox1	Up-Regulated: Proliferation
	Angptl4	Up-Regulated: Apoptosis	0.593852
	Angptl4	Up-Regulated: Extracellular Matrix
	Ccl3	Up-Regulated: Extracellular Matrix	0.237298
	Ccl3	Up-Regulated: Cytoskeleton
	Cyr61	Down-Regulated: Extracellular Matrix	0.287241
	Tnfrsf12a	Up-Regulated: Apoptosis	0.423419
	Socs3	Up-Regulated: Apoptosis	0.470682
	Cd44	Up-Regulated: Apoptosis	0.530279
	Cd44	Up-Regulated: Extracellular Matrix
	Igfbp3	Down-Regulated: Apoptosis	0.428157
	Igfbp3	Down-Regulated: Proliferation
	A2m	Up-Regulated: Other	0.6909
	Mt1	Up-Regulated: Metal Ion Binding	0.567752
	Vim	Up-Regulated: Cytoskeleton	0.669082
	Odc1	Down-Regulated: Proliferation	0.549298
	Btg2	Up-Regulated: Apoptosis	0.626397
	Btg2	Up-Regulated: Proliferation
	Fmo2	Down-Regulated: Xenobiotic Metabolism	0.621113
	Cd24a	Up-Regulated: Apoptosis	0.583158
	Cd24a	Up-Regulated: Proliferation
	Atf3	Up-Regulated: Proliferation	0.461649
Cardiotoxicity
	Il6	Up-Regulated: Angiogenesis	0.205108
	Il6	Up-Regulated: Signal Transduction
	Il6	Up-Regulated: Development
	Il6	Up-Regulated: Metabolism (Regulation & Mechanism):
	Il6	Up-Regulated: Migration / Motility
	Plunc	Up-Regulated: Other	0.0650445
	Cd14	Up-Regulated: Other	0.210705
	Fosl1	Up-Regulated: Cell Cycle	0.289537
	Fosl1	Up-Regulated: Metabolism (Regulation & Mechanism):
	Fosl1	Up-Regulated: Migration / Motility
	Timp1	Up-Regulated: Development	0.316874
	Timp1	Up-Regulated: Metabolism (Regulation & Mechanism):
	Tubb6	Up-Regulated: Other	0.283716
	Ch25h	Up-Regulated: Metabolism (Regulation & Mechanism):	0.561107
	Spp1	Up-Regulated: Development	0.358786
	Mt1	Up-Regulated: Other	0.567752
	Rps6kb1	Down-Regulated: Muscle Contraction	0.634918
	Rps6kb1	Down-Regulated: Signal Transduction
	Rps6kb1	Down-Regulated: Development
	Rps6kb1	Down-Regulated: Migration / Motility
	Vim	Down-Regulated: Other	0.669082
	Ucp1	Up-Regulated: Development	0.508581
	Pvr	Up-Regulated: Migration / Motility	0.564729
	Btg2	Up-Regulated: Development	0.626397
	Btg2	Up-Regulated: Metabolism (Regulation & Mechanism):
	Ccl7	Up-Regulated: Migration / Motility	0.54069
	Vegfa	Down-Regulated: Angiogenesis	0.441206
	Serpine1	Up-Regulated: Angiogenesis	0.311944
	Col3a1	Down-Regulated: Development	0.525179
	Abhd2	Up-Regulated: Migration / Motility	0.545267
	Egr1	Up-Regulated: Development	0.588736
	Egr1	Up-Regulated: Metabolism (Regulation & Mechanism):
Tumor Necrosis Factor (TNF) Ligand and Receptor\n
	Tnf	TNF Superfamily Members: Genes Involved in the Induction of Apoptosis	0.269004
	Tnf	TNF Superfamily Members: Genes Involved in the Inflammatory Response
	Tnf	TNF Superfamily Members: Genes involved in the NF-kappaB Signaling Pathway
	Tnf	Genes Involved in the TNFR1 Signaling Pathway: Genes Involved in the Induction of Apoptosis
	Tnf	Genes Involved in the TNFR1 Signaling Pathway: Genes Involved in the Inflammatory Response
	Tnf	Genes Involved in the TNFR1 Signaling Pathway: Genes Involved in the NF-kappaB Signaling Pathway
	Tnf	Genes Involved in the TNFR1 Signaling Pathway: Genes Involved in the JNK Signaling Pathway
	Tnf	Genes Involved in the TNFR1 Signaling Pathway: Transcription Regulators
	Lmnb1	Genes Involved in the TNFR1 Signaling Pathway: Other Genes Involved in the TNFR1 Signaling Pathway	0.660317
	Tnfrsf12a	TNF Receptor Superfamily Members: Other Apoptosis Genes	0.423419
	Tnfrsf1b	TNF Receptor Superfamily Members: Other Apoptosis Genes	0.443301
	Tnfrsf1b	TNF Receptor Superfamily Members: Genes Involved in the Inflammatory Response
	Tnfrsf1b	Genes Involved in the TNFR2 Signaling Pathway: Apoptosis
	Tnfrsf1b	Genes Involved in the TNFR2 Signaling Pathway: Genes Involved in the Inflammatory Response
	Tnfrsf10b	TNF Receptor Superfamily Members: Genes Involved in Caspase Activation	0.438278
	Eda2r	TNF Receptor Superfamily Members: Other TNF Receptor Superfamily Members	0.638133
	Tnfrsf1a	TNF Receptor Superfamily Members: Other Apoptosis Genes	0.612839
	Tnfrsf1a	TNF Receptor Superfamily Members: Genes Involved in the Inflammatory Response
	Tnfrsf1a	Genes Involved in the TNFR1 Signaling Pathway: Other Apoptosis Genes
	Tnfrsf1a	Genes Involved in the TNFR1 Signaling Pathway: Genes Involved in the Inflammatory Response
	Tnfrsf1a	Genes Involved in the TNFR1 Signaling Pathway: Genes Involved in the NF-kappaB Signaling Pathway
	Tnfrsf1a	Genes Involved in the TNFR1 Signaling Pathway: Transcription Regulators
	Traf1	Genes Involved in the TNFR2 Signaling Pathway: Apoptosis	0.630186
	Tnfaip3	Genes Involved in the TNFR2 Signaling Pathway: Apoptosis	0.442306
	Tnfrsf18	TNF Receptor Superfamily Members: Other TNF Receptor Superfamily Members	0.549572
	Tnfsf14	TNF Superfamily Members: Other TNF Superfamily Members	0.374633
	Nfkb1	Genes Involved in the TNFR2 Signaling Pathway: Apoptosis	0.667826
	Nfkb1	Genes Involved in the TNFR2 Signaling Pathway: Transcription Regulators
	Casp8	Genes Involved in the TNFR1 Signaling Pathway: Caspases	0.652087
	Casp8	Genes Involved in the TNFR1 Signaling Pathway: Other Apoptosis Genes
	Cd40	TNF Receptor Superfamily Members: Other TNF Receptor Superfamily Members	0.532657
	Dusp1	Genes Involved in the TNFR2 Signaling Pathway: Other Genes Involved in the TNFR2 Signaling Pathway	0.595388
Fibrosis
	Mmp3	Extracellular Matrix & Cell Adhesion Remodeling Enzymes	0.408738
	Mmp3	Epithelial-to-Mesenchymal Transition
	Tnf	Inflammatory Cytokines & Chemokines	0.269004
	Thbs1	Signal Transduction TGFß Superfamily	0.187027
	Timp1	Extracellular Matrix & Cell Adhesion Remodeling Enzymes	0.316874
	Timp1	Epithelial-to-Mesenchymal Transition
	Mmp13	Extracellular Matrix & Cell Adhesion Remodeling Enzymes	0.247541
	Ccr2	Inflammatory Cytokines & Chemokines	0.60874
	Il1b	Inflammatory Cytokines & Chemokines	0.237748
	Lox	Extracellular Matrix & Cell Adhesion Remodeling Enzymes	0.31344
	Ccl3	Pro-Fibrotic	0.237298
	Ccl3	Inflammatory Cytokines & Chemokines
	Il1a	Inflammatory Cytokines & Chemokines	0.294544
	Edn1	Growth Factors	0.442121
	Mmp9	Epithelial-to-Mesenchymal Transition	0.327051
	Cebpb	Signal Transduction Transcription Factors	0.498544
	Myc	Signal Transduction Transcription Factors	0.649207
	Snai1	Pro-Fibrotic	0.610365
	Snai1	Epithelial-to-Mesenchymal Transition
	Plat	Extracellular Matrix & Cell Adhesion Remodeling Enzymes	0.641815
	Bmp7	Anti-Fibrotic	0.514241
	Bmp7	Signal Transduction TGFß Superfamily
	Bmp7	Epithelial-to-Mesenchymal Transition
	Tgfb1	Signal Transduction TGFß Superfamily	0.630078
	Tgfb1	Epithelial-to-Mesenchymal Transition
	Dcn	Signal Transduction TGFß Superfamily	0.551121
	Mmp8	Extracellular Matrix & Cell Adhesion Remodeling Enzymes	0.09584
	Vegfa	Growth Factors	0.441206
	Serpine1	Epithelial-to-Mesenchymal Transition	0.311944
	Col3a1	Epithelial-to-Mesenchymal Transition	0.525179
	Mmp14	Extracellular Matrix & Cell Adhesion Remodeling Enzymes	0.674661
	Cav1	Signal Transduction TGFß Superfamily	0.701796
	Nfkb1	Signal Transduction Transcription Factors	0.667826
	Cxcr4	Inflammatory Cytokines & Chemokines	0.494587
JAK / STAT Signaling Pathway
	Mmp3	Genes Induced by STAT Proteins: Stat3	0.408738
	Saa3	Genes Induced by STAT Proteins: Stat3	0.462972
	Saa3	Immune Response: Acute-Phase Response
	Socs3	Negative Regulators of the JAK/ STAT Pathway	0.470682
	Socs3	Cell Growth and / or Maintenance: Cell Growth
	Osm	Genes Induced by STAT Proteins: Stat5	0.297589
	Osm	Cell Growth and / or Maintenance: Cell Growth
	Osm	Immune Response: Other Genes Involved in the Immune Response
	Il4ra	Receptors that Bind and Activate JAK Proteins	0.506977
	Il4ra	Genes Induced by STAT Proteins: Stat6
	Il4ra	Immune Response: Other Genes Involved in the Immune Response
	A2m	Genes Induced by STAT Proteins: Stat3	0.6909
	F2	Immune Response: Acute-Phase Response	0.474906
	Csf2rb2	Receptors that Bind and Activate JAK Proteins	0.563386
	Prl	STAT Protein Nuclear Translocation	0.0291799
	Myc	Transcription Factors or Regulators that Interact with STAT Proteins: Other Transcription Factors and Regulators	0.649207
	Myc	Genes Induced by STAT Proteins: Stat3
	Myc	Genes Induced by STAT Proteins: Stat4
	Myc	Apoptosis
	Myc	Cell Growth and / or Maintenance: Cell Proliferation
	Egfr	Receptors that Bind and Activate JAK Proteins	0.668606
	Egfr	Cell Growth and / or Maintenance: Cell Growth
	Junb	Transcription Factors or Regulators that Interact with STAT Proteins: Other Transcription Factors and Regulators	0.497581
	Junb	Genes Induced by STAT Proteins: Stat3
	Junb	Cell Growth and / or Maintenance: Cell Cycle
	Irf1	Transcription Factors or Regulators that Interact with STAT Proteins: Positive Regulation of Transcription	0.619102
	Irf1	Genes Induced by STAT Proteins: Stat1
	Irf1	Genes Induced by STAT Proteins: Stat3
	Irf1	Genes Induced by STAT Proteins: Stat4
	Irf1	Genes Induced by STAT Proteins: Stat5
	Irf1	Immune Response: Inflammatory Response
	Nfkb1	Transcription Factors or Regulators that Interact with STAT Proteins: Negative Regulation of Transcription	0.667826
	Nfkb1	Apoptosis
	Nfkb1	Immune Response: Inflammatory Response
Neurotrophin and Receptors
	Il6	Cell Growth and Differentiation: Growth Factors and Receptors	0.205108
	Il6	Cell Growth and Differentiation: Cytokines and Receptors
	Il6	Apoptosis: Other Apoptosis Genes
	Il6	Immune response: Acute-phase response
	Il1b	Cell Growth and Differentiation: Growth Factors and Receptors	0.237748
	Il1b	Cell Growth and Differentiation: Cell Cycle
	Il1b	Cell Growth and Differentiation: Cell Proliferation
	Il1b	Cell Growth and Differentiation: Cytokines and Receptors
	Il1b	Immune response: Inflammatory response
	Fgf2	Neurogenesis: Gliogenesis	0.405045
	Fgf2	Cell Growth and Differentiation: Growth Factors and Receptors
	Fgf2	Cell Growth and Differentiation: Cell Cycle
	Fgf2	Cell Growth and Differentiation: Cell Proliferation
	Fgf2	Cell Growth and Differentiation: Cell Differentiation
	Fos	Neurogenesis: Other Neurogenesis Genes	0.247145
	Fos	Transcription factors and regulators: Other transcription factors and regulators
	Myc	Cell Growth and Differentiation: Cell Proliferation	0.649207
	Myc	Apoptosis: Caspase Activation
	Myc	Apoptosis: Induction of Apoptosis
	Myc	Transcription factors and regulators: Other transcription factors and regulators
	Tgfa	Cell Growth and Differentiation: Growth Factors and Receptors	0.416868
	Tgfa	Cell Growth and Differentiation: Cell Cycle
	Tgfa	Cell Growth and Differentiation: Cell Proliferation
	Tgfb1	Cell Growth and Differentiation: Growth Factors and Receptors	0.630078
	Tgfb1	Cell Growth and Differentiation: Cell Cycle
	Tgfb1	Cell Growth and Differentiation: Cell Proliferation
	Tgfb1	Immune response: Inflammatory response
	Ucn	Neurotrophins and Receptors	0.602936
	Hspb1	Apoptosis: Other Apoptosis Genes	0.573473
	Cd40	Neurotrophins and Receptors	0.532657
	Cd40	Apoptosis: Other Apoptosis Genes
	Cxcr4	Neurogenesis: Central Nervous System Development	0.494587
	Cxcr4	Cell Growth and Differentiation: Cell Proliferation
	Cxcr4	Cell Growth and Differentiation: Cytokines and Receptors
Extracellular Matrix and Adhesion Molecules
	Mmp3	Extracellular Matrix Proteins (ECM): ECM Proteases	0.408738
	Thbs1	Cell Adhesion Molecules: Other Adhesion Molecules	0.187027
	Thbs1	Extracellular Matrix Proteins (ECM): Other ECM Molecules
	Timp1	Extracellular Matrix Proteins (ECM): Basement Membrane Constituents	0.316874
	Timp1	Extracellular Matrix Proteins (ECM): ECM Protease Inhibitors
	Mmp12	Extracellular Matrix Proteins (ECM): ECM Proteases	0.217486
	Mmp13	Extracellular Matrix Proteins (ECM): ECM Proteases	0.247541
	Sell	Cell Adhesion Molecules: Transmembrane Molecules	0.210105
	Spp1	Cell Adhesion Molecules: Cell-Matrix Adhesion	0.358786
	Spp1	Extracellular Matrix Proteins (ECM): Other ECM Molecules
	Selp	Cell Adhesion Molecules: Transmembrane Molecules	0.283685
	Adamts1	Extracellular Matrix Proteins (ECM): ECM Proteases	0.37181
	Icam1	Cell Adhesion Molecules: Transmembrane Molecules	0.484995
	Icam1	Cell Adhesion Molecules: Cell-Cell Adhesion
	Mmp9	Extracellular Matrix Proteins (ECM): ECM Proteases	0.327051
	Itga5	Cell Adhesion Molecules: Transmembrane Molecules	0.473842
	Itga5	Cell Adhesion Molecules: Cell-Matrix Adhesion
	Cd44	Cell Adhesion Molecules: Transmembrane Molecules	0.530279
	Col4a1	Extracellular Matrix Proteins (ECM): Basement Membrane Constituents	0.518061
	Col4a1	Extracellular Matrix Proteins (ECM): Collagens and ECM Structural Constituents
	Tgfbi	Cell Adhesion Molecules: Other Adhesion Molecules	0.557871
	Tgfbi	Extracellular Matrix Proteins (ECM): Other ECM Molecules
	Col4a2	Extracellular Matrix Proteins (ECM): Basement Membrane Constituents	0.561536
	Col4a2	Extracellular Matrix Proteins (ECM): Collagens and ECM Structural Constituents
	Col2a1	Extracellular Matrix Proteins (ECM): Collagens and ECM Structural Constituents	0.687216
	Itgax	Cell Adhesion Molecules: Cell-Matrix Adhesion	0.463031
	Mmp8	Extracellular Matrix Proteins (ECM): ECM Proteases	0.09584
	Itgb2	Cell Adhesion Molecules: Transmembrane Molecules	0.662683
	Itgb2	Cell Adhesion Molecules: Cell-Matrix Adhesion
	Entpd1	Cell Adhesion Molecules: Transmembrane Molecules	0.671498
	Entpd1	Extracellular Matrix Proteins (ECM): Basement Membrane Constituents
	Col3a1	Extracellular Matrix Proteins (ECM): Collagens and ECM Structural Constituents	0.525179
	Mmp14	Cell Adhesion Molecules: Transmembrane Molecules	0.674661
	Mmp14	Extracellular Matrix Proteins (ECM): ECM Proteases
	Itgam	Cell Adhesion Molecules: Transmembrane Molecules	0.627779
	Itgam	Cell Adhesion Molecules: Cell-Matrix Adhesion
Hematopoietic Stem Cells and Hematopoiesis
	Cd14	Signaling Molecules: Cell Surface Receptors Linked to Signal Transduction	0.210705
	Spp1	Cytokines and Growth Factors: Cytokines	0.358786
	Spp1	Cytokines and Growth Factors: Growth Factors
	Spp1	Cell Differentiation: Differentiation Regulators for Other Blood Cell Types
	Cd86	Cell Surface / Cell Lineage Markers	0.478185
	Cd86	Blood Cell Activation: T-Cell Activation
	Cd86	Cell Differentiation: T-Cell Differentiation
	Cd86	Transcription Factors and Regulators
	Il1a	Cytokines and Growth Factors: Cytokines	0.294544
	Il1a	Cytokines and Growth Factors: Growth Factors
	Il1a	Cell Cycle Regulators: Other Regulators of the Cell Cycle
	Mmp9	Hematopoiesis Regulators	0.327051
	Cd44	Cell Surface / Cell Lineage Markers	0.530279
	Cd80	Cell Surface / Cell Lineage Markers	0.534045
	Cd80	Blood Cell Activation: T-Cell Activation
	Cd80	Cell Differentiation: T-Cell Differentiation
	Cd80	Transcription Factors and Regulators
	Runx1	Transcription Factors and Regulators	0.507132
	Blnk	Cell Differentiation: B-Cell Differentiation	0.442386
	Trim10	Hematopoiesis Regulators	0.351336
	Vegfa	Cytokines and Growth Factors: Growth Factors	0.441206
	Vegfa	Cell Cycle Regulators: Other Regulators of the Cell Cycle
	Ets1	Transcription Factors and Regulators	0.531623
	Il31ra	Cell Surface / Cell Lineage Markers	0.607888
	Il31ra	Blood Cell Activation: Genes Activating Other Blood Cell Types
	Il31ra	Cell Differentiation: Differentiation Regulators for Other Blood Cell Types
	Il31ra	Hematopoiesis Regulators
	Il31ra	Signaling Molecules: JAK / STAT Cascade
	Il31ra	Transcription Factors and Regulators
	Ptprc	Cell Surface / Cell Lineage Markers	0.642186
	Ptprc	Signaling Molecules: Cell Surface Receptors Linked to Signal Transduction
	Il11	Cytokines and Growth Factors: Cytokines	0.185079
	Il11	Cytokines and Growth Factors: Growth Factors
	Il11	Blood Cell Activation: Genes Activating Other Blood Cell Types
	Il11	Cell Differentiation: B-Cell Differentiation
	Il11	Cell Differentiation: Differentiation Regulators for Other Blood Cell Types
Hypertension
	Calca	Vasodilation	0.640371
	Calca	Blood Pressure Regulation
	Edn1	Vasoconstriction	0.442121
	Edn1	Smooth Muscle Contraction
	Edn1	Blood Pressure Regulation
	Edn1	Nitric Oxide Metabolism
	Edn1	Hypoxia Response
	Sphk1	Second-Messenger-Mediated Signaling	0.417217
	Sphk1	Lipid Metabolism
	Ptgir	Cyclic-GMP Synthesis & Signaling	0.452332
	Ptgir	Second-Messenger-Mediated Signaling
	Ptgs2	Vasoconstriction	0.57346
	Ptgs2	Smooth Muscle Contraction
	Ptgs2	Blood Pressure Regulation
	Clic1	Ion Transport	0.512031
	Edn2	Vasoconstriction	0.47398
	Edn2	Smooth Muscle Contraction
	Edn2	Blood Pressure Regulation
	Uts2	Smooth Muscle Contraction	0.31665
	Uts2	Blood Pressure Regulation
	Gch1	Vasodilation	0.579117
	Gch1	Blood Pressure Regulation
	Gch1	Nitric Oxide Metabolism
	Clic4	Ion Transport	0.54446
	Kcnj8	Vasodilation	0.701155
	Ednra	Vasoconstriction	0.590064
	Ednra	Smooth Muscle Contraction
	Ednra	Hypoxia Response
	Cav1	Vasoconstriction	0.701796
	Cav1	Smooth Muscle Contraction
	Cav1	Nitric Oxide Metabolism
	Cav1	Hypoxia Response
	Avpr1a	Vasoconstriction	0.608952
	Avpr1a	Blood Pressure Regulation
	Adm	Vasodilation	0.295815
	Adm	Vasoconstriction
	Adm	Hypoxia Response
Hypoxia Signaling Pathway
	Il6	Response to Stress: Immune Response	0.205108
	Il6	Apoptosis: Other Apoptosis Genes
	Il6	Protein Metabolism: Protein Biosynthesis
	Il6	Protein Metabolism: Protein Binding
	Il6	Extracellular Matrix (ECM)-Related Molecules: Other Extracellular Molecules
	Il6	Cell Growth: Growth Factors
	Hmox1	Response to Stress: Other Genes Related to Stress Response	0.424526
	Hmox1	Hemoglobin Complex Associated Genes
	Hmox1	Oxidoreductase: Other Oxidoreductase Genes
	Angptl4	Response to Stress: Response to Hypoxia	0.593852
	Angptl4	Apoptosis: Anti-apoptosis
	Angptl4	Extracellular Matrix (ECM)-Related Molecules: Other Extracellular Molecules
	Angptl4	Metabolism: Lipid Metabolism
	Il1a	Response to Stress: Immune Response	0.294544
	Il1a	Signal Transduction
	Il1a	Extracellular Matrix (ECM)-Related Molecules: Other Extracellular Molecules
	Il1a	Cell Growth: Cell Cycle
	Il1a	Cell Growth: Cell Proliferation
	Il1a	Cell Growth: Growth Factors
	Ptx3	Response to Stress: Other Genes Related to Stress Response	0.479157
	Ptx3	Extracellular Matrix (ECM)-Related Molecules: Other Extracellular Molecules
	Ptx3	Metabolism: Carbohydrate Metabolism
	Ptx3	Metabolism: Other Metabolism Genes
	Tgfb1	Response to Stress: Immune Response	0.630078
	Tgfb1	Protein Metabolism: Protein Amino Acid Phosphorylation
	Tgfb1	Protein Metabolism: Protein Binding
	Tgfb1	Extracellular Matrix (ECM)-Related Molecules: Other Extracellular Molecules
	Tgfb1	Cell Growth: Cell Cycle
	Tgfb1	Cell Growth: Cell Proliferation
	Tgfb1	Cell Growth: Growth Factors
	Th	Oxidoreductase: Other Oxidoreductase Genes	0.572375
	Th	Metabolism: Other Metabolism Genes
	Vegfa	Apoptosis: Anti-apoptosis	0.441206
	Vegfa	Extracellular Matrix (ECM)-Related Molecules: Other Extracellular Molecules
	Vegfa	Cell Growth: Cell Cycle
	Vegfa	Cell Growth: Cell Proliferation
	Vegfa	Cell Growth: Growth Factors
	Iqgap1	Signal Transduction	0.664106
	Iqgap1	Cardiac Excitation-Contraction (E-C) Coupling
	Adm	Extracellular Matrix (ECM)-Related Molecules: Other Extracellular Molecules	0.295815
Toll-Like Receptor Signaling Pathway
	Il6	Pathogen-Specific Responses: Bacterial	0.205108
	Il6	Pathogen-Specific Responses: Viral
	Il6	Downstream Pathways and Target Genes: JAK/STAT Pathway
	Il6	Downstream Pathways and Target Genes: Cytokine-Mediated Signaling Pathway
	Csf3	Downstream Pathways and Target Genes: Cytokine-Mediated Signaling Pathway	0.127872
	Ccl2	Downstream Pathways and Target Genes: Cytokine-Mediated Signaling Pathway	0.406599
	Tnf	Pathogen-Specific Responses: Viral	0.269004
	Tnf	Downstream Pathways and Target Genes: NFκB Pathway
	Tnf	Downstream Pathways and Target Genes: JNK/p38 Pathway
	Tnf	Downstream Pathways and Target Genes: Cytokine-Mediated Signaling Pathway
	Cd14	Pathogen-Specific Responses: Bacterial	0.210705
	Cd14	Adaptors & TLR Interacting Proteins
	Clec4e	Pathogen-Specific Responses: Fungal/Parasitic	0.25115
	Il1b	Pathogen-Specific Responses: Bacterial	0.237748
	Il1b	Downstream Pathways and Target Genes: NFκB Pathway
	Il1b	Downstream Pathways and Target Genes: Cytokine-Mediated Signaling Pathway
	Il1b	Regulation of Adaptive Immunity
	Cd86	Regulation of Adaptive Immunity	0.478185
	Tlr2	Toll-Like Receptors	0.423457
	Tlr2	Pathogen-Specific Responses: Bacterial
	Tlr2	Pathogen-Specific Responses: Fungal/Parasitic
	Tlr2	TLR Signaling: MYD88-Dependent
	Hspa1a	Pathogen-Specific Responses: Bacterial	0.447653
	Hspa1a	Pathogen-Specific Responses: Fungal/Parasitic
	Ifnb1	Pathogen-Specific Responses: Viral	0.31296
	Ifnb1	Downstream Pathways and Target Genes: Interferon Regulatory Factor (IRF) Pathway
	Cd80	Regulation of Adaptive Immunity	0.534045
	Cebpb	Downstream Pathways and Target Genes: Cytokine-Mediated Signaling Pathway	0.498544
	Tnfrsf1a	Pathogen-Specific Responses: Bacterial	0.612839
	Tnfrsf1a	Downstream Pathways and Target Genes: NFκB Pathway
	Tnfrsf1a	Downstream Pathways and Target Genes: Cytokine-Mediated Signaling Pathway
	Fos	Pathogen-Specific Responses: Bacterial	0.247145
	Fos	Downstream Pathways and Target Genes: JNK/p38 Pathway
	Tlr6	Toll-Like Receptors	0.620525
	Tlr6	Pathogen-Specific Responses: Bacterial
	Tlr6	TLR Signaling: MYD88-Dependent
	Nfkb2	Downstream Pathways and Target Genes: NFκB Pathway	0.586012
	Tnfaip3	Downstream Pathways and Target Genes: NFκB Pathway	0.442306
	Irf1	Downstream Pathways and Target Genes: Interferon Regulatory Factor (IRF) Pathway	0.619102
	Nfkb1	Downstream Pathways and Target Genes: NFκB Pathway	0.667826
	Casp8	Downstream Pathways and Target Genes: NFκB Pathway	0.652087
Molecular Toxicology PathwayFinder
	Il6	Cholestasis	0.205108
	Il6	Immunotoxicity
	Tnf	Apoptosis	0.269004
	Tnf	Cholestasis
	Tnf	Immunotoxicity
	Il1b	Cholestasis	0.237748
	Il1b	Immunotoxicity
	Cd86	Immunotoxicity	0.478185
	Il1a	Immunotoxicity	0.294544
	Icam1	Cholestasis	0.484995
	Htra4	ER Stress & Unfolded Protein Response	0.460449
	Hspa1a	Heat Shock Response	0.447653
	Cd44	Immunotoxicity	0.530279
	Tnfrsf10b	Apoptosis	0.438278
	Sc4mol	Phospholipidosis	0.612788
	Birc3	Apoptosis	0.452345
	F2	Immunotoxicity	0.474906
	Cd80	Immunotoxicity	0.534045
	Dhcr24	Oxidative Stress & Antioxidant Response	0.626812
	Tnfrsf1a	Apoptosis	0.612839
	Tnfrsf1a	Necrosis
	Ptgs2	Immunotoxicity	0.57346
	Mki67	Immunotoxicity	0.589524
	Ahsg	Immunotoxicity	0.601388
	Mcl1	Apoptosis	0.570873
	Itgax	Immunotoxicity	0.463031
	Cd36	Steatosis	0.450298
	C3	Immunotoxicity	0.668922
	Tgfb1	Cholestasis	0.630078
	Hspb7	Heat Shock Response	0.534535
	Trim10	Immunotoxicity	0.351336
	Ucp1	Mitochondrial Energy Metabolism	0.508581
	Duox1	Oxidative Stress & Antioxidant Response	0.583549
	Fmo2	Cytochrome P450s & Phase I Drug Metabolism	0.621113
	Edem1	ER Stress & Unfolded Protein Response	0.616019
	S100a8	Phospholipidosis	0.132705
	Nfkb1	Immunotoxicity	0.667826
	Casp8	Apoptosis	0.652087
	Hspb1	Heat Shock Response	0.573473
	Cd40	Apoptosis	0.532657
	Cd40	Immunotoxicity
	Ptprc	Immunotoxicity	0.642186
	Ppp1r15b	Oxidative Stress & Antioxidant Response	0.64439
Th1-Th2-Th3
	Il6	CD4+T Cell Markers	0.205108
	Il6	Other Immune Response Genes
	Tnf	TH1 Cytokines and Related Genes	0.269004
	Tnf	Other Immune Response Genes
	Ccl11	TH2 Cytokines and Related Genes	0.257103
	Ccl11	Other Immune Response Genes
	Ccr2	TH2 Cytokines and Related Genes	0.60874
	Ccr2	Other Immune Response Genes
	Spp1	Immune Cell Activation: T-cell Activation	0.358786
	Spp1	T-helper 1 Type Immune Response
	Ccl5	TH2 Cytokines and Related Genes	0.60236
	Ccl5	Other Immune Response Genes
	Ccl5	Transcription Factors and Regulators: Transcription Factor Activity
	Tbx21	TH1 Cytokines and Related Genes	0.151198
	Tbx21	Immune Cell Activation: B-cell Activation
	Tbx21	Transcription Factors and Regulators: Transcription Factor Activity
	Cd86	CD4+T Cell Markers	0.478185
	Socs3	CD4+T Cell Markers	0.470682
	Il4ra	TH2 Cytokines and Related Genes	0.506977
	Il4ra	Other Immune Response Genes
	Cd80	CD4+T Cell Markers	0.534045
	Cebpb	TH2 Cytokines and Related Genes	0.498544
	Cebpb	Transcription Factors and Regulators: Transcription Factor Activity
	Il13ra1	TH2 Cytokines and Related Genes	0.477971
	Tlr6	T-helper 1 Type Immune Response	0.620525
	Junb	TH2 Cytokines and Related Genes	0.497581
	Junb	Transcription Factors and Regulators: Transcription Factor Activity
	Ccl7	TH2 Cytokines and Related Genes	0.54069
	Ccl7	Other Immune Response Genes
	Cd28	TH1 Cytokines and Related Genes	0.57403
	Cd28	Immune Cell Activation: T-cell Activation
	Irf1	TH1 Cytokines and Related Genes	0.619102
	Irf1	T-helper 1 Type Immune Response
	Irf1	Transcription Factors and Regulators: Positive Regulation of Transcription
	Irf1	Transcription Factors and Regulators: Transcription Factor Activity
	Nfkb1	T-helper 1 Type Immune Response	0.667826
	Nfkb1	Transcription Factors and Regulators: Negative Regulation of Transcription
	Nfkb1	Transcription Factors and Regulators: Transcription Factor Activity
	Nfkb1	Transcription Factors and Regulators: Transcriptional Repressor Activity
	Cd40	TH1 Cytokines and Related Genes	0.532657
	Cd40	Immune Cell Activation: B-cell Activation
	Ptprc	CD4+T Cell Markers	0.642186
	Ptprc	Immune Cell Activation: T-cell Activation
	Ptprc	Immune Cell Activation: B-cell Activation
NFκB Signaling Pathway
	Il6	NFkB Responsive Genes: Cytokines	0.205108
	Il6	NFkB Responsive Genes: Ligands and Receptors
	Il6	Other Factors Involved in the NFκB Pathway: Ligands and Receptors
	Csf3	NFkB Responsive Genes: Cytokines	0.127872
	Csf3	NFkB Responsive Genes: Other Extracellular and Membrane Molecules
	Csf3	Other Factors Involved in the NFκB Pathway: Other Extracellular and Membrane Molecules
	Ccl2	Other Factors Involved in the NFκB Pathway: Ligands and Receptors	0.406599
	Ccl2	Other Factors Involved in the NFκB Pathway: Inflammatory Response
	Tnf	Activation of the NFκB Pathway: Ligands and Receptors	0.269004
	Tnf	NFkB Responsive Genes: Cytokines
	Il1b	Other Factors Involved in the NFκB Pathway: Ligands and Receptors	0.237748
	Il1b	Other Factors Involved in the NFκB Pathway: Inflammatory Response
	Bcl3	Other Factors Involved in the NFκB Pathway: Others	0.542772
	Il1a	Other Factors Involved in the NFκB Pathway: Ligands and Receptors	0.294544
	Il1a	Other Factors Involved in the NFκB Pathway: Inflammatory Response
	Tlr2	Activation of the NFκB Pathway: Ligands and Receptors	0.423457
	Tlr2	Activation of the NFκB Pathway: Inflammatory Response
	Icam1	NFkB Responsive Genes: Other Extracellular and Membrane Molecules	0.484995
	Icam1	Other Factors Involved in the NFκB Pathway: Other Extracellular and Membrane Molecules
	Tnfrsf1b	Other Factors Involved in the NFκB Pathway: Ligands and Receptors	0.443301
	Tnfrsf1b	Other Factors Involved in the NFκB Pathway: Inflammatory Response
	Tnfrsf1a	Other Factors Involved in the NFκB Pathway: Ligands and Receptors	0.612839
	Tnfrsf1a	Other Factors Involved in the NFκB Pathway: Inflammatory Response
	Fos	Other Factors Involved in the NFκB Pathway: Transcription Factors	0.247145
	Tlr6	Activation of the NFκB Pathway: Ligands and Receptors	0.620525
	Tlr6	Activation of the NFκB Pathway: Inflammatory Response
	Nfkb2	Other Factors Involved in the NFκB Pathway: Transcription Factors	0.586012
	Nalp12	Other Factors Involved in the NFκB Pathway: Others	0.449575
	C3	NFkB Responsive Genes: Acute Phase Response Proteins	0.668922
	C3	NFkB Responsive Genes: Other Extracellular and Membrane Molecules
	C3	Other Factors Involved in the NFκB Pathway: Other Extracellular and Membrane Molecules
	C3	Other Factors Involved in the NFκB Pathway: Inflammatory Response
	Htr2b	Other Factors Involved in the NFκB Pathway: Ligands and Receptors	0.461965
	Tnfaip3	Other Factors Involved in the NFκB Pathway: Others	0.442306
	Tnfsf14	Activation of the NFκB Pathway: Ligands and Receptors	0.374633
	Irf1	NFkB Responsive Genes: Cytokines	0.619102
	Irf1	NFkB Responsive Genes: Transcription Factors
	Irf1	Other Factors Involved in the NFκB Pathway: Transcription Factors
	Nfkb1	Activation of the NFκB Pathway: Transcription Factors	0.667826
	Casp8	Other Factors Involved in the NFκB Pathway: Others	0.652087
	Cd40	Other Factors Involved in the NFκB Pathway: Ligands and Receptors	0.532657
	Relb	Other Factors Involved in the NFκB Pathway: Transcription Factors	0.585852
	Raf1	Other Factors Involved in the NFκB Pathway: Ligands and Receptors	0.533653
	Raf1	Other Factors Involved in the NFκB Pathway: Kinases
	Egr1	Other Factors Involved in the NFκB Pathway: Transcription Factors	0.588736
Cell Motility
	Plaur	Receptors	0.252299
	Igf1	Growth Factors	0.678864
	Fgf2	Chemotaxis	0.405045
	Fgf2	Growth Factors
	Msn	Rho Family GTPases: Rho Signaling	0.557153
	Msn	Adhesion: Cell-Cell Adhesion
	Msn	Adhesion: Leukocyte Adhesion & Rolling
	Msn	Cellular Projections: Filopodia
	Msn	Cellular Projections: Invasive Projections
	Myh9	Chemotaxis	0.63544
	Myh9	Adhesion: Cell-Cell Adhesion
	Myh9	Integrin-Mediated Signaling
	Myh9	Cellular Projections: Stress Fibers
	Myh9	Cellular Projections: Membrane Blebs
	Myh9	Cellular Projections: Invasive Projections
	Myh9	Cellular Projections: Membrane Ruffles
	Myh9	Cell Polarity
	Myh9	Proteolysis
	Vim	Rho Family GTPases: Rho Signaling	0.669082
	Rac2	Chemotaxis	0.527326
	Rac2	Rho Family GTPases: Rac Signaling
	Rac2	Cellular Projections: Invasive Projections
	Rac2	Cellular Projections: Membrane Ruffles
	Rhoc	Rho Family GTPases: Rho Signaling	0.576097
	Rhoc	Cellular Projections: Stress Fibers
	Egfr	Receptors	0.668606
	Egfr	Adhesion: Cell-Cell Adhesion
	Egfr	Cellular Projections: Filopodia
	Egfr	Cellular Projections: Lammelipodia
	Tgfb1	Chemotaxis	0.630078
	Tgfb1	Growth Factors
	Tgfb1	Adhesion: Cell-Cell Adhesion
	Tgfb1	Cellular Projections: Invasive Projections
	Itgb2	Chemotaxis	0.662683
	Itgb2	Receptors
	Itgb2	Adhesion: Cell-Cell Adhesion
	Itgb2	Adhesion: Cell-Matrix Adhesion
	Itgb2	Adhesion: Leukocyte Adhesion & Rolling
	Itgb2	Integrin-Mediated Signaling
	Vegfa	Chemotaxis	0.441206
	Vegfa	Growth Factors
	Vegfa	Cellular Projections: Invasive Projections
	Mmp14	Adhesion: Cell-Matrix Adhesion	0.674661
	Mmp14	Cellular Projections: Invasive Projections
	Mmp14	Proteolysis
	Cav1	Adhesion: Focal Adhesion	0.701796
TGFβ / BMP Signaling Pathway
	Il6	TGFβ Superfamily Cytokines: GDF	0.205108
	Il6	Smad Target Genes: TGF-β / Activin Responsive
	Il6	Adhesion and Extracellular Molecules: Other Extracellular Molecules
	Il6	Genes Involving in Cellular and Developmental Processes: Apoptosis
	Igf1	TGFβ Superfamily Cytokines: GDF	0.678864
	Igf1	Smad Target Genes: TGF-β / Activin Responsive
	Igf1	Adhesion and Extracellular Molecules: Other Extracellular Molecules
	Igf1	Genes Involving in Cellular and Developmental Processes: Apoptosis
	Igf1	Genes Involving in Cellular and Developmental Processes: Neurogenesis
	Igfbp3	TGFβ Superfamily Cytokines: GDF	0.428157
	Igfbp3	Receptors
	Igfbp3	Smad Target Genes: TGF-β / Activin Responsive
	Igfbp3	Adhesion and Extracellular Molecules: Other Extracellular Molecules
	Igfbp3	Genes Involving in Cellular and Developmental Processes: Apoptosis
	Runx1	Molecules regulating signaling of TGF-β superfamily	0.507132
	Runx1	Transcription Factors and Regulators
	Runx1	Genes Involving in Cellular and Developmental Processes: Neurogenesis
	Ltbp2	TGFβ Superfamily Cytokines: GDF	0.439215
	Fos	Smad Target Genes: TGF-β / Activin Responsive	0.247145
	Fos	Transcription Factors and Regulators
	Fos	Genes Involving in Cellular and Developmental Processes: Neurogenesis
	Tgfbi	Smad Target Genes: TGF-β / Activin Responsive	0.557871
	Tgfbi	Adhesion and Extracellular Molecules: Adhesion Molecules
	Tgfbi	Adhesion and Extracellular Molecules: Extracellular Matrix Structural Constituents
	Myc	TGFβ Superfamily Cytokines: GDF	0.649207
	Myc	Smad Target Genes: TGF-β / Activin Responsive
	Myc	Transcription Factors and Regulators
	Myc	Genes Involving in Cellular and Developmental Processes: Apoptosis
	Inhbb	TGFβ Superfamily Cytokines: Activin	0.587289
	Inhbb	Adhesion and Extracellular Molecules: Other Extracellular Molecules
	Inhbb	Genes Involving in Cellular and Developmental Processes: Reproduction
	Plat	Smad Target Genes: TGF-β / Activin Responsive	0.641815
	Plat	Adhesion and Extracellular Molecules: Other Extracellular Molecules
	Bmp7	TGFβ Superfamily Cytokines: BMP	0.514241
	Bmp7	Adhesion and Extracellular Molecules: Other Extracellular Molecules
	Bmp7	Genes Involving in Cellular and Developmental Processes: Embryonic Development
	Tgfb1	TGFβ Superfamily Cytokines: TGF-β	0.630078
	Tgfb1	Adhesion and Extracellular Molecules: Extracellular Matrix Structural Constituents
	Tgfb1	Genes Involving in Cellular and Developmental Processes: Muscle Development
	Junb	Smad Target Genes: TGF-β / Activin Responsive	0.497581
	Junb	Smad Target Genes: BMP Responsive
	Junb	Transcription Factors and Regulators
	Serpine1	Smad Target Genes: TGF-β / Activin Responsive	0.311944
	Serpine1	Adhesion and Extracellular Molecules: Other Extracellular Molecules
	Col3a1	Smad Target Genes: TGF-β / Activin Responsive	0.525179
	Col3a1	Adhesion and Extracellular Molecules: Extracellular Matrix Structural Constituents
	Cdkn2b	Smad Target Genes: TGF-β / Activin Responsive	0.63343
	Cdkn2b	Molecules regulating signaling of TGF-β superfamily
Epithelial to Mesenchymal Transition (EMT)
	Mmp3	Genes Up-Regulated During EMT	0.408738
	Mmp3	Extracellular Matrix & Cell Adhesion
	Il1rn	Genes Down-Regulated During EMT	0.327915
	Timp1	Genes Up-Regulated During EMT	0.316874
	Timp1	Cell Growth & Proliferation
	Timp1	Extracellular Matrix & Cell Adhesion
	Tfpi2	Genes Down-Regulated During EMT	0.384888
	Spp1	Genes Down-Regulated During EMT	0.358786
	Spp1	Extracellular Matrix & Cell Adhesion
	Krt19	Genes Down-Regulated During EMT	0.322972
	Krt19	Signaling Pathways: Estrogen Receptor
	Mmp9	Genes Up-Regulated During EMT	0.327051
	Mmp9	Extracellular Matrix & Cell Adhesion
	Itga5	Genes Up-Regulated During EMT	0.473842
	Itga5	Extracellular Matrix & Cell Adhesion
	Itga5	Signaling Pathways: Integrin-Mediated
	Ahnak	Genes Up-Regulated During EMT	0.526129
	Msn	Genes Up-Regulated During EMT	0.557153
	Msn	Migration & Motility
	Krt7	Cytoskeleton	0.517524
	Vim	Genes Up-Regulated During EMT	0.669082
	Vim	Migration & Motility
	Vim	Cytoskeleton
	Snai1	Genes Up-Regulated During EMT	0.610365
	Snai1	Differentiation & Development
	Snai1	Morphogenesis
	Bmp7	Differentiation & Development	0.514241
	Bmp7	Cell Growth & Proliferation
	Bmp7	Extracellular Matrix & Cell Adhesion
	Bmp7	Signaling Pathways: TGFβ / BMP
	Egfr	Cell Growth & Proliferation	0.668606
	Egfr	Migration & Motility
	Egfr	Extracellular Matrix & Cell Adhesion
	Egfr	Signaling Pathways: Receptor Tyrosine Kinase
	Tgfb1	Morphogenesis	0.630078
	Tgfb1	Cell Growth & Proliferation
	Tgfb1	Migration & Motility
	Tgfb1	Extracellular Matrix & Cell Adhesion
	Tgfb1	Signaling Pathways: TGFβ / BMP
	F11r	Differentiation & Development	0.64287
	F11r	Extracellular Matrix & Cell Adhesion
	Serpine1	Genes Up-Regulated During EMT	0.311944
	Serpine1	Extracellular Matrix & Cell Adhesion
	Col3a1	Genes Up-Regulated During EMT	0.525179
	Col3a1	Differentiation & Development
	Col3a1	Extracellular Matrix & Cell Adhesion
	Col3a1	Signaling Pathways: Integrin-Mediated
	Col3a1	Signaling Pathways: TGFβ / BMP
	Steap1	Genes Up-Regulated During EMT	0.621505
	Cald1	Genes Up-Regulated During EMT	0.63208
	Cald1	Migration & Motility
	Col5a2	Genes Up-Regulated During EMT	0.480683
	Col5a2	Differentiation & Development
	Col5a2	Extracellular Matrix & Cell Adhesion
Innate and Adaptive Immune Response
	Il6	IL-1R / TLR Members and Related Genes: Cytokines	0.205108
	Il6	Septic Shock: Cytokines and Growth Factors
	Il1rn	IL-1R / TLR Members and Related Genes: Inflammatory Response	0.327915
	Il1rn	Septic Shock: Inflammatory Response
	Ccl2	Host Defense to Bacteria: Inflammatory Response	0.406599
	Ccl2	Host Defense to Bacteria: Cytokines, Chemokines, and their Receptors
	Tnf	IL-1R / TLR Members and Related Genes: Inflammatory Response	0.269004
	Tnf	IL-1R / TLR Members and Related Genes: Apoptosis
	Tnf	IL-1R / TLR Members and Related Genes: Cytokines
	Tnf	Septic Shock: Apoptosis
	Tnf	Septic Shock: Cytokines and Growth Factors
	Tnf	Septic Shock: Inflammatory Response
	Trem1	Septic Shock: Other Genes Involved in Septic Shock	0.151577
	Cd14	Host Defense to Bacteria: LSP Receptor	0.210705
	Cd14	Host Defense to Bacteria: Inflammatory Response
	Il1r2	IL-1R / TLR Members and Related Genes: Interleukin-1 Receptors	0.295876
	Il1b	IL-1R / TLR Members and Related Genes: Inflammatory Response	0.237748
	Il1b	IL-1R / TLR Members and Related Genes: Apoptosis
	Il1b	IL-1R / TLR Members and Related Genes: Cytokines
	Il1b	Septic Shock: Apoptosis
	Il1b	Septic Shock: Cytokines and Growth Factors
	Il1b	Septic Shock: Inflammatory Response
	Hmox1	Septic Shock: Other Genes Involved in Septic Shock	0.424526
	Il1a	IL-1R / TLR Members and Related Genes: Inflammatory Response	0.294544
	Il1a	IL-1R / TLR Members and Related Genes: Apoptosis
	Il1a	IL-1R / TLR Members and Related Genes: Cytokines
	Tlr2	IL-1R / TLR Members and Related Genes: Inflammatory Response	0.423457
	Tlr2	Septic Shock: Inflammatory Response
	Camp	Host Defense to Bacteria: Defense Response to Bacteria	0.508712
	Ltf	Host Defense to Bacteria: Defense Response to Bacteria	0.317348
	Il1f9	IL-1R / TLR Members and Related Genes: Cytokines	0.327453
	Ifnb1	IL-1R / TLR Members and Related Genes: Cytokines	0.31296
	Ifnb1	Innate Immune Response: Other Genes Involved in the Innate Immune Response
	Clec7a	Host Defense to Bacteria: Defense Response to Bacteria	0.527907
	Casp4	Septic Shock: Apoptosis	0.490643
	Tnfrsf1a	Septic Shock: Apoptosis	0.612839
	Cybb	Host Defense to Bacteria: Inflammatory Response	0.54094
	Cybb	Host Defense to Bacteria: Antibacterial Humoral Response
	Tlr6	IL-1R / TLR Members and Related Genes: Detection of Pathogens	0.620525
	Tlr6	IL-1R / TLR Members and Related Genes: Inflammatory Response
	Tlr6	IL-1R / TLR Members and Related Genes: Genes Involved in NFκB Signaling
	Tlr6	Host Defense to Bacteria: Detection of Bacteria
	Tlr6	Host Defense to Bacteria: Inflammatory Response
	Tlr6	Host Defense to Bacteria: Defense Response to Bacteria
	Ncf4	Host Defense to Bacteria: Other Genes Involved in the Host Defense Against Bacteria	0.514369
	Nfkb2	Septic Shock: Other Genes Involved in Septic Shock	0.586012
	Il1rap	IL-1R / TLR Members and Related Genes: Interleukin-1 Receptors	0.456147
	Tgfb1	IL-1R / TLR Members and Related Genes: Apoptosis	0.630078
	Serpine1	Septic Shock: Other Genes Involved in Septic Shock	0.311944
	Irf1	Host Defense to Bacteria: Other Genes Involved in the Host Defense Against Bacteria	0.619102
	Nfkb1	IL-1R / TLR Members and Related Genes: Inflammatory Response	0.667826
	Nfkb1	IL-1R / TLR Members and Related Genes: Apoptosis
	Nfkb1	Host Defense to Bacteria: Inflammatory Response
	Nfkb1	Host Defense to Bacteria: Antibacterial Humoral Response
	Nfkb1	Septic Shock: Apoptosis
	Nfkb1	Septic Shock: Inflammatory Response
	Cxcr4	Host Defense to Bacteria: LSP Receptor	0.494587
	Cxcr4	Host Defense to Bacteria: Cytokines, Chemokines, and their Receptors
Osteogenesis
	Csf3	Cell Growth and Differentiation: Growth Factors and Receptors	0.127872
	Csf3	Extracellular Matrix (ECM) Proteins: Other ECM Molecules
	Tnf	Skeletal Development: Osteoclast Differentiation	0.269004
	Igf1	Cell Growth and Differentiation: Growth Factors and Receptors	0.678864
	Igf1	Cell Growth and Differentiation: Cell Differentiation
	Igf1	Extracellular Matrix (ECM) Proteins: Other ECM Molecules
	Icam1	Cell Adhesion Molecules: Cell-cell Adhesion	0.484995
	Fgf2	Cell Growth and Differentiation: Regulation of Cell Cycle	0.405045
	Fgf2	Cell Growth and Differentiation: Cell Proliferation
	Fgf2	Cell Growth and Differentiation: Growth Factors and Receptors
	Fgf2	Cell Growth and Differentiation: Cell Differentiation
	Fgf2	Extracellular Matrix (ECM) Proteins: Other ECM Molecules
	Mmp9	Extracellular Matrix (ECM) Proteins: ECM Proteases	0.327051
	Col12a1	Bone Mineral Metabolism: Phosphate Transport	0.5014
	Col12a1	Extracellular Matrix (ECM) Proteins: Other ECM Molecules
	Col12a1	Cell Adhesion Molecules: Other Cell Adhesion Molecules
	Ahsg	Skeletal Development: Bone Mineralization	0.601388
	Ahsg	Skeletal Development: Ossification
	Ahsg	Extracellular Matrix (ECM) Proteins: ECM Protease Inhibitors
	Col4a1	Bone Mineral Metabolism: Phosphate Transport	0.518061
	Col4a1	Extracellular Matrix (ECM) Proteins: Basement Membrane Constituents
	Col4a1	Extracellular Matrix (ECM) Proteins: Collagens
	Col4a2	Bone Mineral Metabolism: Phosphate Transport	0.561536
	Col4a2	Extracellular Matrix (ECM) Proteins: Basement Membrane Constituents
	Col4a2	Extracellular Matrix (ECM) Proteins: Collagens
	Col2a1	Skeletal Development: Cartilage Condensation	0.687216
	Col2a1	Bone Mineral Metabolism: Phosphate Transport
	Col2a1	Extracellular Matrix (ECM) Proteins: Collagens
	Cd36	Cell Adhesion Molecules: Other Cell Adhesion Molecules	0.450298
	Tgfb1	Skeletal Development: Other Skeletal Development Genes	0.630078
	Tgfb1	Cell Growth and Differentiation: Regulation of Cell Cycle
	Tgfb1	Cell Growth and Differentiation: Cell Proliferation
	Tgfb1	Cell Growth and Differentiation: Growth Factors and Receptors
	Tgfb1	Extracellular Matrix (ECM) Proteins: Other ECM Molecules
	Mmp8	Bone Mineral Metabolism: Calcium Ion Binding and Homeostasis	0.09584
	Mmp8	Extracellular Matrix (ECM) Proteins: ECM Proteases
	Vegfa	Cell Growth and Differentiation: Regulation of Cell Cycle	0.441206
	Vegfa	Cell Growth and Differentiation: Cell Proliferation
	Vegfa	Cell Growth and Differentiation: Growth Factors and Receptors
	Vegfa	Extracellular Matrix (ECM) Proteins: Other ECM Molecules
	Fgfr2	Skeletal Development: Bone Mineralization	0.474269
	Fgfr2	Cell Growth and Differentiation: Cell Proliferation
	Fgfr2	Extracellular Matrix (ECM) Proteins: Other ECM Molecules
	Col3a1	Bone Mineral Metabolism: Phosphate Transport	0.525179
	Col3a1	Extracellular Matrix (ECM) Proteins: Collagens
	Nfkb1	Transcription Factors and Regulators	0.667826
	Vdr	Skeletal Development: Other Skeletal Development Genes	0.525751
	Vdr	Bone Mineral Metabolism: Calcium Ion Binding and Homeostasis
	Vdr	Cell Growth and Differentiation: Growth Factors and Receptors
	Flt1	Cell Growth and Differentiation: Growth Factors and Receptors	0.66531
	Flt1	Extracellular Matrix (ECM) Proteins: Other ECM Molecules
	Col6a2	Bone Mineral Metabolism: Phosphate Transport	0.434554
	Col6a2	Extracellular Matrix (ECM) Proteins: Collagens
	Col6a2	Cell Adhesion Molecules: Other Cell Adhesion Molecules
	Col7a1	Bone Mineral Metabolism: Phosphate Transport	0.597544
	Col7a1	Extracellular Matrix (ECM) Proteins: ECM Protease Inhibitors
	Itgam	Extracellular Matrix (ECM) Proteins: Other ECM Molecules	0.627779
	Itgam	Cell Adhesion Molecules: Cell-matrix Adhesion
Multiple Sclerosis
	Il6	T Cell Activation/Signaling	0.205108
	Il6	Cytokine/Chemokine
	Il6	Inflammation: Regulation
	Il6	Inflammation: Genera
	Tnf	Cytokine/Chemokine	0.269004
	Tnf	Inflammation: Response
	Tnf	Inflammation: Apoptosis: Neuronal
[truncated: 275 more rows]
